# Supplementary material for: A Combined Transcriptomics and Proteomics Approach Reveals the Differences in the Predatory and Defensive Venoms of the Molluscivorous Cone Snail Cylinder ammiralis (Caenogastropoda: Conidae)
Source: MDPI journal article supplement (doi:10.3390/toxins13090642), 2021-09-10

Supplementary Material Figure S1 – Extension of the Fig. 2, including a second panel with details of all the superfamilies included within the “Minor” category

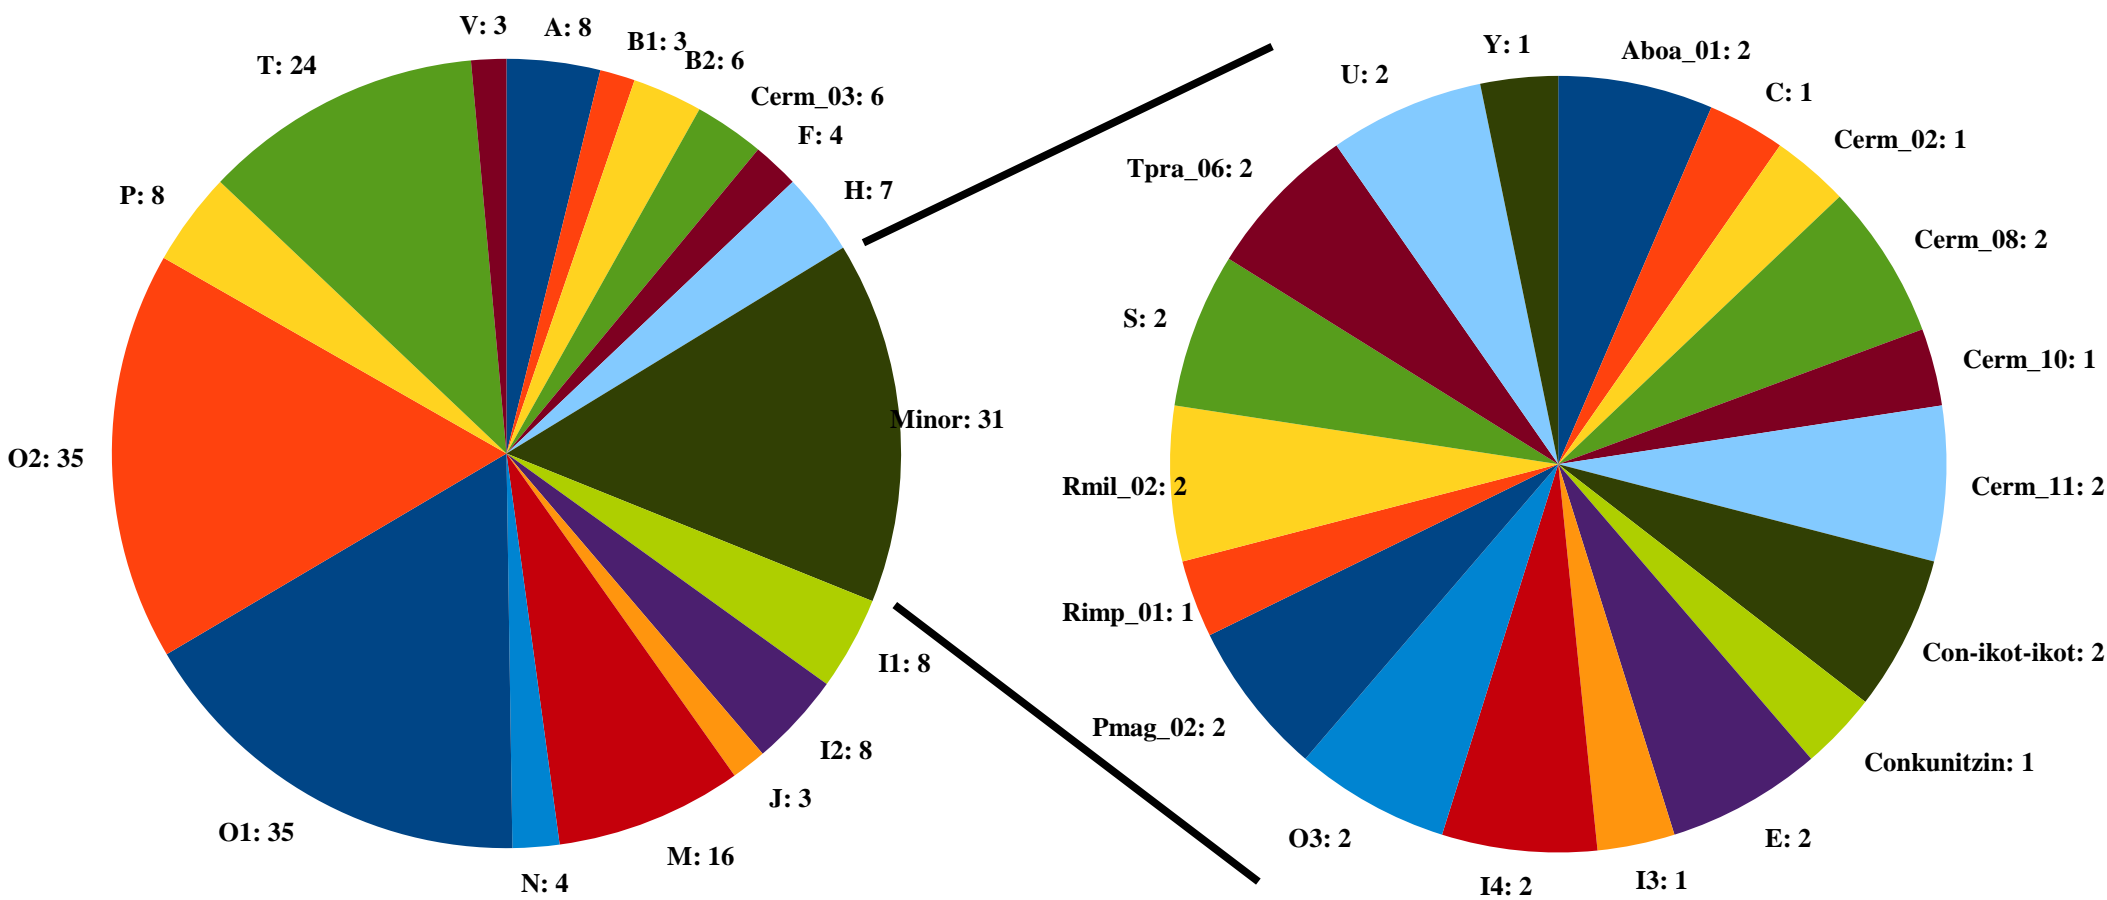

Supplement: s1 [file s1]
