# Supplementary material for: A Combined Transcriptomics and Proteomics Approach Reveals the Differences in the Predatory and Defensive Venoms of the Molluscivorous Cone Snail Cylinder ammiralis (Caenogastropoda: Conidae)
Source: Toxins (Basel). 2021 Sep 10;13(9):642. doi: 10.3390/toxins13090642 (PMC8472973; doi:10.3390/toxins13090642)
Supplement: Supplementary file 1 [file toxins-13-00642-s001.zip]

Archive with 11 entries (11 files):
- Sup. Mat. Fig. S1 - Conotoxins diversity ammiralis expanded.pdf
- Sup. Mat. Fig. S2 - Transcriptome-Abundance_vs_Expression.pdf
- Sup. Mat. Fig. S3 - PCA comparing diet composition accross diets.pdf
- Sup. Mat. File 1.txt
- Sup. Mat. File 2.txt
- Sup. Mat. File 3.txt
- Sup. Mat. Table 1 - OK053A_conotoxins.xlsx
- Sup. Mat. Table 2 - shared and uniques peptides.xlsx
- Sup. Mat. Table 3 - Summary significances among diets.xlsx
- Sup. Mat. Table 4 - mtDNA tree.xlsx
- Sup. Mat. Table 5 - Abundance superfamilies per diet.xlsx
