# Supplementary material for: A Combined Transcriptomics and Proteomics Approach Reveals the Differences in the Predatory and Defensive Venoms of the Molluscivorous Cone Snail Cylinder ammiralis (Caenogastropoda: Conidae)
Source: Toxins (Basel). 2021 Sep 10;13(9):642. doi: 10.3390/toxins13090642 (PMC8472973; doi:10.3390/toxins13090642)
Supplement: Supplementary file 1 [file toxins-13-00642-s001.zip › Sup. Mat. File 2.txt]

Supplementary Material File 2: Alignments of the five conotoxin precursors of Cylinder ammiralis present in ConoServer with
the closest sequences found in the transcriptome. The asterisks represent different ammino acids in a given position


[Superfamily A-1]
[Framework I]

[alpha 4/7]
[                                  /------Signal-------/----------------Pro-------------/ /---CC----C-------C/--]

ammiralisP02945                    -----MFTVFLLVVLATTVVSSTSGRR----AFRGRNAAA--KASGLVGL-TDR RP-ECCSDPRCNSTHPELCGGRR
OK053_009                          MGMRMMFIVFLLVVLATTVVSSTSGRR----AFRGRNAAA--KASGLVGL-TDR RP-ECCSDPRCNSTHPELCGGRR
                                          *
ammiralisP02943                    -----MFTVFLLVVLATTVVSFTSD-R----AFRGRNAAA--KASGLVGL-TDK RQ-ECCSYPACNLDHPELCG---
OK053_010                          MGMRIMFTVFLLVVLATTVVSFTSD-R----AFRGRNAAA--KASGLVGL-TDK RQ-ECCSYPACNLDHPELCG---


[Superfamily O1-3]
[Delta]
[Framework VI/VII]
[                                  /----Signal-----------/-------------Pro----------------/ /C------C----------CC----C----C-]

ammiralisP03028                    -MKLTCVMIVAVLFLTAWTFATA-DDPRNGLGNLFSNAHHEMKNPEASKLN-KR-W -CKQSGEMCNL-LD-Q--NCCEGY-CIVLVCT-
OK053_211                          -----------------WTCATA-DDSGNGLENLFSNAHHEMKNPEASKLN-KR-W -CKQSGEMCNL-LD-Q--NCCEGY-CIVLVCT-
                                                      *      **   *
ammiralisP03063                    -MKLTCVMIIAVLFLTAWTFATA-DDSGNGLENLFSKAHHEMKNPKASKLN-KR-- -CTQSGELCDV-ID-P--DCCNNF-CIIFFCI-
OK053_193                          ----TCMMIIAVLFLTAWTFATA-DDSGNGLENLFSKAHHEMKNPKASKLN-KR-- -CTQSGELCDV-ID-P--DCCNKF-CIIFFCI-
                                         *                                                                        *
ammiralisP03100                    -MKLTCLMIVAVLFLTAWTFVTAVPDSSNALENLYLKAHHEMNNPEDSELN-KR-- -CYDGGTSCN----TG-NQCCSGW-CI-FLCL-
OK053_208                          -MKLTCMMIIAVLFLTAWTFVTAVPDSSNALENLYLKAHHEMNNPEDSELN-KR-- -CYDGGTSCN----TG-NQCCSGW-CI-FVCL-
                                         *  *                                                                            *
