# Supplementary material for: A Combined Transcriptomics and Proteomics Approach Reveals the Differences in the Predatory and Defensive Venoms of the Molluscivorous Cone Snail Cylinder ammiralis (Caenogastropoda: Conidae)
Source: Toxins (Basel). 2021 Sep 10;13(9):642. doi: 10.3390/toxins13090642 (PMC8472973; doi:10.3390/toxins13090642)
Supplement: Supplementary file 1 [file toxins-13-00642-s001.zip › Sup. Mat. File 3.txt]

>OK053_135 J superfamily
MASVQSVTCCCFLWLMLSVQLVTPSPPGTAHLPRDTRDVPEIVLELMCPMLCPNGFGGEYCTCTKKRDMVSSRISRKRSMAM*
>OK053_139 J superfamily
MASVQSVTCCCFLWLMLSVQLVTPSPPGTAHLPRDGTDRDIPNDDESAVCYFLCLMGINLDECNCPEKRDLVFTDQ*
>OK053_178 M superfamily
LKMGVVLFIFLVLFPLATLQLDADQPVERYAENKQLLNPDERRGILLPALRKFCCDSNWCHISDCECCYG*
>OK053_190 O1 superfamily
MKLTCMMIVAVLFLTAWTFATADDPRNGLGNLFSNAHHEMKNPEASKLNKRWCKQSGEMCNFTDQNCCDGYCILLFCT*
>OK053_191 O1 superfamily
MKLTCMMIVAVLFLTAWTFATADDSSNGLENLFSKAHHEMKNPEASKLNKRCVDQ
>OK053_205 O1 superfamily
WTCATADDSGNGLENLFSNAHHEMKNPEASKLNKRCKEADEPCSIFSLDRCCSGVCFGICMS*
>OK053_207 O1 superfamily
MKLTCMMIIAVLFLTAWTFATADDSSNGLENLSSKAHHKMKNPKASKLNKR
>OK053_208 O1 superfamily
MKLTCMMIIAVLFLTAWTFVTAVPDSSNALENLYLKAHHEMNNPEDSELNKRCYDGGTSCNTGNQCCSGWCIFVCL*
>OK053_210 O1 superfamily
MKLTCMMIIAVLFLTAWTFATADDPRNGLGNLFSNAHHEMKNPEASKLNKRCKQADEPCSILSLDQCCSGVCFGICI*
>OK053_211 O1 superfamily
WTCATADDSGNGLENLFSNAHHEMKNPEASKLNKRWCKQSGEMCNLLDQNCCEGYCIVLVCT*
>OK053_212 O1 superfamily
WTCATADDSGNGLENLFSNAHHEMKNPEASKLNKRCKQADEPCSILSLDQCCSGVCFGICI*
>OK053_213 O1 superfamily
MKLTCMMIIAVLFLTAWTFATADDPRNGLGNLFSNAHHEMKNPEASKLNKRWCKQSGEMCNFTDQNCCDGYCILLFCT*
>OK053_253 O2 superfamily
MQKLIILLLVAAVLMSTQAVLQEKRPKEKIKFLSKKKTDAEKQQKRLCPDYTEPCSHAHECCSWNCHNGHCTG*
>OK053_263 O2 superfamily
MGKLTILVLVAAALLSTQIMVQGDGDQPADRDAVPRDNIPGGTSEKFMNVLQRRECPWKPWCG*
>OK053_269 O2 superfamily
MGKLTILFLVAAALLSTQIMVQGDGDQPADRDAVPRDNKPGGTSGQFMTFLRQVRCRMTPLCR*
>OK053_273 O2 superfamily
MEKLTILLLVAALLLSIQAVNQEKHQRAKINLLSKRKPPAERWWRWGGCMAWFGKCSKDSECCSNSCDITRCELMRFPPDW*
>OK053_274 O2 superfamily
MEKLTILLLVAAVLMSTQALNQEQHQRAKINLLSKRKPPAERWWRWGGCMAWFGRCTKDSECCSNSCDITRCELMRFPPDW*
>OK053_292 O2 superfamily
MEKLTILLLVAAILMSTQALVERAGENRSKENIKFLLKRKRAADRGMW
>OK053_295 O2 superfamily
MEKLTILLLVAAVLMSTQALFQEKRTMKKIDFLSKGKADAEKQRKRNCSDDWQYCESPSDCCSWDCDVVCSG*
>OK053_296 O2 superfamily
MEKLTILLLVAAVLMSTQALVERAGENRSKENIKFLLKRKRAADRGMWGDCKDGLTTCFAPSECCSEDCEGSCTMW*
