# Supplementary material for: A Combined Transcriptomics and Proteomics Approach Reveals the Differences in the Predatory and Defensive Venoms of the Molluscivorous Cone Snail Cylinder ammiralis (Caenogastropoda: Conidae)
Source: Toxins (Basel). 2021 Sep 10;13(9):642. doi: 10.3390/toxins13090642 (PMC8472973; doi:10.3390/toxins13090642)
Supplement: Supplementary file 1 [file toxins-13-00642-s001.zip › Sup. Mat. Table 1 - OK053A_conotoxins.xlsx]

## Sheet: 1-Venom_composition
Supplementary Material Table 1: List of conotoxins, hormones, and venom-related proteins found in the venom gland transcriptome of Cylinder ammiralis
Code	Superfam	Superfamily	Sequence	Stop codon	Complete	Contig name
OK053_002	A	A-1	MGMRMMFIMFLFVVLATTVVSFTSDRASDDRNAAPNGKACDLIALIVRG	No	0	>TRINITY_DN23932_c2_g1_i3_Frame_R3
OK053_003	A	A-1	MGMRMMFIVFLLVVFASSVTLDHAYHDRYAAVVDRASALLAQAVLRGCCSNPPCALNNPDCR	*	1	>TRINITY_DN23932_c2_g1_i4_Frame_R3
OK053_004	A	A-1	MGMRMMFIMFLFVVLATTVVSLTLDRASDDTDVAAEIMSGLIALAIDSCCSDSDCNANHPDMCS	*	1	>TRINITY_DN23932_c2_g1_i5_Frame_R3
OK053_005	A	A-1	MRMMFIMFLFVVLATTVVSFTSDRVSDGRSAAANDKAPDLISQTVRDDCCHNAPCRFNNPDICG	*	1	>TRINITY_DN23932_c2_g1_i9_Frame_R2
OK053_006	A	A-1	MGMRMMFIMFLFVVLATTVVSFTSDRASDGRNAAANVKAPDLIALTVRNDCCHNAPCRNNHPGICG	*	1	>TRINITY_DN23932_c2_g1_i11_Frame_R3
OK053_007	A	A-1	MGVRMMFIMFVFVVLATTVVSFTSDRASDGRNAAANVKAPDLIALTVRNDCCHNAPCRNNHPGICG	*	1	>TRINITY_DN23932_c2_g1_i13_Frame_R3
OK053_009	A	A-1	MGMRMMFIVFLLVVLATTVVSSTSGRRAFRGRNAAAKASGLVGLTDRRPECCSDPRCNSTHPELCGGRR	*	1	>TRINITY_DN25124_c2_g1_i10_Frame_R1
OK053_010	A	A-1	MGMRIMFTVFLLVVLATTVVSFTSDRAFRGRNAAAKASGLVGLTDKRQECCSYPACNLDHPELCG	*	1	>TRINITY_DN25124_c2_g1_i12_Frame_R1
OK053_072	Aboa_01	Aboa_01	MTRNMKMTFSGFVLIVLVTTVVGLPDHRGEVSDNLSHCRLPEFRLCLLECWIEDERYCFPGCTFGILLEHGFHTIRPDCNVFKFCYYRCILLGKTEAHCWNGTAASVTGDKADLDTC	*	1	>TRINITY_DN24433_c0_g1_i4_Frame_F2
OK053_074	Aboa_01	Aboa_01	MTMYMKTMFGGFVLVVLVITVVGTSGHRGEFPNNLIHCRLPEFRFCLIRCWIEEERNCYSNCTFEIGKNLGIHTHGFDCTVFKVCYYRCYLFGRPEAHCWNKAAETVTGEVAELDVC	*	1	>TRINITY_DN24433_c0_g1_i8_Frame_F2
OK053_014	B1	B1 (Conantokin)	MQLYTHLYLLVPLVTFYLILGTGTLGDGGALTERRSADVTALKPEPVLLQKSAARSTSDNGKDRLTQMRRIFIKRGNTARGYEDDAEDVEYIGDLEEL	*	1	>TRINITY_DN23168_c0_g1_i2_Frame_R2
OK053_015	B1	B1 (Conantokin)	MQLYTHLYLLVPLVTFYLILGTGTLGDGGALTERRSADATALKPEPILLQKSAARSTDDNGKDTLTQMKRTLKKRGNVATDREEILETIRELNESGKR	*	1	>TRINITY_DN23168_c0_g1_i3_Frame_R2
OK053_017	B1	B1 (Conantokin)	MQLYTHLYLLVPLVTFYLILGTGTLGDGGALTERRSADATALKPEPVLLQKSAARSTDDNGKDRLTQMRRIFIKRGNTARGYEEDREVAETVRELDEHGKR	*	1	>TRINITY_DN23168_c0_g1_i5_Frame_R2
OK053_018	B2	B2	MLRLIIAAVLASACLAYPQRRDGAPANAAPNLQPFNGEMAMPNMQPMHALPMSMSGMSSPQLMPLNPNLGMGFKRENLEKRRQHSQFSDDNKSPFDSEDGLGNFMNFMKENGNNLPFANMDSAATDLGHFEPSAENEDGKFRFFDKEQ	*	1	>TRINITY_DN24274_c5_g1_i1_Frame_R3
OK053_019	B2	B2	MLRLIIAAVLASACLAFPQRRDGAPANVDPNLQPFGGVIPNMQPMQGMTGMPSPQFLPFNPNFAVGLKRENLEKRRHNPQFSDNNQSPFGSEGDLDSFMNFMKENGNNLPFADVNSAATDLGHFEPSDENEAGKFRFFDKEQ	*	1	>TRINITY_DN24274_c5_g1_i2_Frame_R3
OK053_020	B2	B2	MLRLIIAAVLASACLAYPQRRDGAPAEATNLQGFGPGMMQPMPDMQGMQPMQPMQPMPAGQFLPFNPNYFAGYKRAADENPEKRRLPSKFNEDKSSFEPEGGLGDFMNFMKETGNSLPFANIEGPAAGLGNFETSAENSQEDGKFRFFDKEQ	*	1	>TRINITY_DN24274_c5_g1_i3_Frame_R3
OK053_021	B2	B2	MLRLITAAVLVSACLAYPQKKEDAPPDTANLQGFGQPMPAMPNMQGMQMPGMQMPGMPMQNPFLPFGMGFKRDLDEDLEKRKHHSKFNEGNNSPFGSEADPESFMNFMKGNGDNFPFANMDSADTADLGNFQPSENEDGKFRFFDKEQ	*	1	>TRINITY_DN24274_c5_g2_i1_Frame_R3
OK053_022	B2	B2	KRHHSQCNEDNISPFNTEEGLGNFMKFMDNGNNLPFANMDSDDLGLDSFQPSAENEEGKFRFFDGQL	*	0	>TRINITY_DN24274_c5_g3_i1_Frame_R3
OK053_023	B2	B2	MLRLIIAAVLVCACLAYPQKRDGAPADAANLQGFDQGMMAMPNMQPMQPMPMMGMQGQFMPFNPGFGAMGYKRDLDEDLEQKRHHSQFNEDNISPFNTEEGLGNFMNFMDNGNNLPFANVDSDDLGLDSFQPSAENEEGKFRFFDGQQ	*	1	>TRINITY_DN25017_c3_g2_i1_Frame_R3
OK053_025	C	C	MQTAYWVVMMMMMVWITAPLSEGGKLNDVIRGLVPDDLTLQRMFKSLFSHRLSGGTYSRVDTCIWKVCPQSP	*	1	>TRINITY_DN39632_c0_g1_i1_Frame_F1
OK053_026	Cerm_02	Cerm_02	MRFLLLLCIVVLLTPFRETEARLPEKSFRQRQAHPFQRIQRCPWCGMSCCSPNYCQGVTCTIVG	*	1	>TRINITY_DN2749_c0_g1_i1_Frame_F2
OK053_029	Cerm_03	Cerm_03-3	MKMSATLIVLLVLGLSFTDGALHRTINGRGASGPHNRDAMGQLIPRGKCGDRCPSGICNVDGTCRD	*	1	>TRINITY_DN18623_c0_g1_i1_Frame_R3
OK053_140	Cerm_03	Cerm_03-5	MKLTVMFIVFLMLTMPMASAEISRRTIDGGEAGVLAGDRATNKNALLQQRLCPTSCSSCSNC	*	1	>TRINITY_DN23080_c0_g1_i1_Frame_F1
OK053_141	Cerm_03	Cerm_03-5	MKLSVMFIVFLMLTMPMTCAGISRSATNGGEADVRAHDKAANLMALLQERMCPPLCKPSCTNCG	*	1	>TRINITY_DN23080_c0_g2_i1_Frame_F3
OK053_142	Cerm_03	Cerm_03-6	MQPSVMLVVLLMLTMPFINGLMPRTATRRKDVAPNDRHAVDSQKLKRFCPNPCQSCPSPGECVRPYTGHTFFLHLR	*	1	>TRINITY_DN23224_c0_g1_i1_Frame_F1
OK053_143	Cerm_03	Cerm_03-6	MQPSVMLVVLLMLTMPFINGLMPRTATRRKDVAPNDRHAVDSQKLKRFCPNPCQSCPSPGECVLPNSYAFILRLR	*	1	>TRINITY_DN23224_c0_g1_i2_Frame_F1
OK053_144	Cerm_03	Cerm_03-6	MHLSVMLVVLLLTMPLFNGFVHNTIAGRKTVVPKDDSAEYPKIRRCPTTCTSCNPPGTCQT	*	1	>TRINITY_DN34600_c0_g1_i1_Frame_R2
OK053_031	Cerm_08	Cerm_08	MMLFMFAAIIFTMASSTVNAHICEQNEDLCATLIDGVTTEICDCPNGACPRGNDYKITVGSVSLYTCQQISAFDDCTRGQHLVDDDFTQIYCKCSNGMYTVGGSQGIVCV	*	1	>TRINITY_DN23359_c12_g1_i2_Frame_F1
OK053_032	Cerm_08	Cerm_08	MKLFIFAAIIVAMATAEQCPNNRAVCAWQDQEGVNCDCIGTSCTKDSAHSINAAGSTLYTCQEISAFRECVGSEAALNSDFSQMNCRCASGVYTISGTAVVCG	*	1	>TRINITY_DN23359_c12_g1_i4_Frame_F2
OK053_035	Cerm_10	Cerm_10	MKFSTFVMVLMAAVLLTGILETEARRSFTARLKAKRFDQDDYLERVEEICEGTNRDCRGQPDGTTCCRNSHCSQGVCYLNF	*	1	>TRINITY_DN21510_c0_g1_i1_Frame_R3
OK053_036	Cerm_11	Cerm_11	MEFCRVVAVALIVTLVMTIDSVPADQTETGRVSLREDDRFPCASDQCACLPEEGSTTSWVCQSIQASRDDCVNDECITEDEWGGRR	*	1	>TRINITY_DN18271_c0_g1_i1_Frame_F3
OK053_037	Cerm_11	Cerm_11	MEFRRLVTVALLLALVLSIDSMPADQTETGRVSLREGNEFPCNSDQCACLPKEGSSTSYQCQSTSASTDDCFNDECITEDEW	*	1	>TRINITY_DN21363_c0_g1_i2_Frame_R2
OK053_042	Con-ikot-ikot	Con-ikot-ikot-2	MAMNMWMTISVCVVVVMATTVVGSTPLQERGLSLDERRAIGCCAWQVYDCLVQRGHYWYICYSWASWICTRGLSDRCCPGLERCIRRCVSGYRNVCYYHCIFESC	*	1	>TRINITY_DN18330_c0_g1_i1_Frame_R2
OK053_043	Con-ikot-ikot	Con-ikot-ikot-2	MAMNMWMTISVCVVVVMATTVVGSTPSQEQGLSLDKRRNVGCCAWEVYDCLIQRRSHFYICYSWASWICTRDLSDGCCPRLGRCIRRCVWGDRDLCYYHCIVARC	*	1	>TRINITY_DN18330_c0_g1_i2_Frame_R2
OK053_048	Conkunitzin	Conkunitzin-5	MATFNIVLAALFASVILVDFAVQARRCHPPCEYGERCVSANRRERRHRHNNVCVPVRCLFQARRGRCLNFDRRYHFNTLTMSCTRVHTGACYGRNNRFSSSENCELTCAPRR	*	1	>TRINITY_DN20321_c0_g1_i1_Frame_F2
OK053_089	E	E-2	MMTRVFFAMFFLMALTEGWPRLYDSDCVRGRNMHITCFKDQTCGLTVKRNGRLNCSLTCSCRRGESCLHGEYIDWDSRGLKVHICPKPWF	*	1	>TRINITY_DN24091_c4_g1_i4_Frame_R1
OK053_090	E	E-2	MMTRVFLVMFFLLVLTEGWPRLIDSDCERGRNMHITCFKDQSCGLIVKRNGRLSCSLNCKCRRNESCLPSEEVDWDHRDMKIVICPKPWF	*	1	>TRINITY_DN24091_c4_g1_i7_Frame_R1
OK053_093	F	F-1	MQRGAVLLVVVAFLALWPQAGAEPYDLNDPDVKAMINDGRKLMDTCAEANHYIDDRWSTYSIVYFEDKGLYHRMLAELVPCLNAFLRTRQEAP	*	1	>TRINITY_DN24074_c5_g1_i1_Frame_F1
OK053_094	F	F-1	MQRGAVLLVVVAFLALWSQAAAEEYDLNDPDVLAIVDEGQKLMHACSIANKYTYDPWWKLNILAFKEMRVYHSMMSDMVTCLNHFSRRRHEEH	*	1	>TRINITY_DN24074_c5_g1_i2_Frame_F2
OK053_095	F	F-1	MQRGAVLLVVVAFLALWSQAAADVYDLMDPDVLAMIDVGKKMMHACSIANKHIDDPWWMLDVLDFKEKSVYYTMMSDLVTCLNHFFRIRFEEP	*	1	>TRINITY_DN24074_c5_g1_i4_Frame_F2
OK053_096	F	F-1	MQRGAVLLGVVAFLGLLPQAAAKVYNLHETEVWAVVAYSKRLMNACAIANSLMDDLWLVVDDKELEERS	No	0	>TRINITY_DN24074_c5_g1_i6_Frame_F2
OK053_105	H	H-1a	MNTAGRLLLLCLALSLVFESLGIPVADDVEADRDTDPDEKDPSVHNSLKDVYGDCGGELCKFGCCKTDDGERKCQHFGCR	*	1	>TRINITY_DN24534_c3_g1_i3_Frame_F2
OK053_106	H	H-1a	MNTAGRLLLLCLALSLVFESLGIPVADDVEADRDTDPDDKDASVHNSWRVEMDCGGVPCKFGCCIEDRCREIGCD	*	1	>TRINITY_DN24534_c3_g1_i8_Frame_F2
OK053_097	H	H-2a	MRTSGRLLLLCLAVGLLLESQAHPIADAGDANRDVGSDRTSVELSKMLEGWQAEKGQRKATARKPVYVYPPGGRSFY	*	1	>TRINITY_DN24241_c3_g1_i1_Frame_F1
OK053_099	H	H-2a	ADAGDATRDVGSDRTSVKLSKMLKRWQAEKGQRKASAHDEEGAFYIFDPNRRSFY	*	0	>TRINITY_DN24241_c3_g1_i3_Frame_F3
OK053_100	H	H-2a	MRTSGRLLLLCLAVGLLLESQAHPNADAGDATRDVGSDRTSVELSKMLKRWQAEKGQRKASAHDEEGSFYIFDPNRRSFY	*	1	>TRINITY_DN24241_c3_g1_i4_Frame_F1
OK053_102	H	H-2a	ADAGDATRDVGSDRTSVKLSKMLKRWQAEKGQRKATARGKKNFYVVPPAGSRSFY	*	0	>TRINITY_DN24241_c3_g1_i6_Frame_F3
OK053_107	H	H-2b	MRTSSQLLFLCVSMGLVFALLGHPIADVRDAAGGADSEERSMQGSQTVEEKEASSS	No	0	>TRINITY_DN50723_c0_g1_i1_Frame_F3
OK053_110	I1	I1-2	MKLCVTFLLILVILPSVTGEESSERTLSGDTLTGDRRTCSDRGHACVHESDCCAQLCCMDKKCALTMPPCNYY	*	1	>TRINITY_DN25014_c0_g1_i2_Frame_F1
OK053_111	I1	I1-2	MKLCVTFLLILVILPSVTGEESSERTLSGDTLTGDRRTCSNKGQECGDNSDCCWHLCCVDNKCAHLILLCNL	*	1	>TRINITY_DN25014_c0_g1_i3_Frame_F1
OK053_113	I1	I1-2	MKLCVTFLLILVILPSVTGEESSERTLSGAALRGDRGTCSGRGQECKHDSDCCGHLCCAGITCQFTYIPCK	*	1	>TRINITY_DN25014_c0_g1_i5_Frame_F1
OK053_114	I1	I1-2	MKLCVTFLLLLVILPTVTGEKSSERTLSGAKGDRRRCVTVGERCEQFSNCCGGMCCLSHVCVITAIPCAF	*	1	>TRINITY_DN25014_c0_g1_i7_Frame_F1
OK053_115	I1	I1-2	MKLCVTFLLILVILPSLTGEESSERTLSGAALRDEWGTCSHIRQGCKHDSDCCGHLCCAGITCQFTYIPCK	*	1	>TRINITY_DN25014_c0_g1_i8_Frame_F1
OK053_116	I1	I1-2	MKLCVTFLLILVILPSLTGEESSERTLSGAALRGDRGMCSDIGQGCGQDSDCCGDMCCVVQRCVMTIITCTF	*	1	>TRINITY_DN25014_c0_g1_i10_Frame_F1
OK053_118	I1	I1-2	MKLCVTFLLILVILPSVTGEKSGERTLRGDSLVGDWGTCSDRGQECKHDYDCCDDLCCTGITCQFTYFSCK	*	1	>TRINITY_DN25014_c0_g1_i13_Frame_F1
OK053_119	I1	I1-2	MKLCVTFLLILVILPSMTGEKSSKHTLSGAILRGNRERCLHRGEQCRRANACCMNMCCHDLKCESMPGECPPF	*	1	>TRINITY_DN25014_c0_g1_i15_Frame_F1
OK053_121	I2	I2-1	MVRVTSVSCFLLVIVFLNLVVPTNACAGNEQSCNTREDCCEPLNCCNNACDFPCRIVGKRAKYREFFRQR	*	1	>TRINITY_DN24506_c7_g1_i1_Frame_F2
OK053_122	I2	I2-1	MVRVTSVSCFLLVIVSLNLVVLTNACAPPGSSCNHTDNKCCISACCSGACVLPCRRPGKRAKLLEFFRQR	*	1	>TRINITY_DN24506_c7_g1_i4_Frame_F1
OK053_123	I2	I2-1	MVRVTSVSCFLLVIVFLNLIVPTTTNDCIPEGSHCGVSSSCCKSTCCMETCQDPCRYTWKRAKLQELFRQR	*	1	>TRINITY_DN24506_c7_g1_i5_Frame_F2
OK053_124	I2	I2-1	MVRVTSVSCFLLVIVSLNLVVLTNACIPEGSPCSTGNSCCHKSCCRWTCNLPCLIPGKRAKLLEFFRQR	*	1	>TRINITY_DN24506_c7_g1_i6_Frame_F2
OK053_125	I2	I2-1	MMFRLTSVSCFLLVIVLLNLVVLTDACGAAGLPCPLNDPCCADMDCCGDVCLLNCEKRGRRQVPLKLFGQR	*	1	>TRINITY_DN24506_c7_g2_i1_Frame_F1
OK053_126	I2	I2-1	MFRVTSVSCFLLVIVLLNLAALTDACHPEGTPCTNDEQCCLMECCFWSCSSNCEKRGRRQALMALFGQR	*	1	>TRINITY_DN24506_c7_g2_i2_Frame_F2
OK053_127	I2	I2-1	MFRVTSVSCFLLVIVLLNLAALTDACHLEGALCENDADCCLLECCLWRCASNCEKRGRRQALMALFGQR	*	1	>TRINITY_DN24506_c7_g2_i3_Frame_F2
OK053_120	I2	I2-2	MMCRLTSLCCLLVIVFLNSAAGGIPCVGSGGVCSSHVWCCDSLDVCCELPGPSMCTPEAACESVGSALGRRAQYTRFFRR	*	1	>TRINITY_DN23766_c1_g1_i1_Frame_R3
OK053_128	I3	I3	MKLFWAIVVILMLLPLRTGVETSDNHASRSATALRDRLLRPKRCYGSLHECENTDECCTGYCCVKAGYC	No	0	>TRINITY_DN9097_c0_g1_i1_Frame_F1
OK053_130	I4	I4	MSGHTSVNFLLLSIVALGMVATVICSCDSEFSSEFCEQPEESCSCSTHTCCHWSRKDQCMKPQRCISAQKGNGRRRLTHMQK	*	1	>TRINITY_DN25128_c1_g1_i1_Frame_R3
OK053_131	I4	I4	GHTSVSFLLLSIVALGMVATVICSCNPYISSETCEHPEENCSCPNTSCCELYPRKNQCMSEEMCYIARLPPGSRGLTRMQKRFLRMPRHLAD	*	0	>TRINITY_DN25128_c1_g1_i2_Frame_R1
OK053_135	J	J-1	MASVQSVTCCCFLWLMLSVQLVTPSPPGTAHLPRDTRDVPEIVLELMCPMLCPNGFGGEYCTCTKKRDMVSSRISRKRSMAM	*	1	>TRINITY_DN25054_c3_g1_i2_Frame_F2
OK053_138	J	J-1	MTSVQSVTCCCFLWLMLSVQLVTPSSPGTAHLPRDGSDRESRDFFLDILCTFFCFDKLGFDFGGEFCDCSEVSDFGLLPDQ	*	1	>TRINITY_DN25054_c3_g1_i10_Frame_F1
OK053_139	J	J-1	MASVQSVTCCCFLWLMLSVQLVTPSPPGTAHLPRDGTDRDIPNDDESAVCYFLCLMGINLDECNCPEKRDLVFTDQ	*	1	>TRINITY_DN25054_c3_g1_i12_Frame_F1
OK053_169	M	M-2	LTICLLLFSLNAVPLDGDQPAYQPAERLLDDISSENNPFYDPAKRCCMTCFGCTPCCG	*	0	>TRINITY_DN24842_c1_g1_i10_Frame_R3
OK053_172	M	M-2	ICLLLFSLNAVPLDGDQPADQPAERLQDNISSKHHPIFDAVRGCCHPSTCHMRKGCSRCCS	*	0	>TRINITY_DN24842_c1_g1_i18_Frame_R3
OK053_173	M	M-2	LLFPLTALPLDGDQPADQAAERMQAEQHPLFDQKRRCCRFPCPDTCRHLCCG	*	0	>TRINITY_DN24842_c1_g1_i23_Frame_R2
OK053_183	M	M-2	LTICLLLFSLTAVPLDGDQHADQLAERLQDRLPTENHPLYDPVKRCCNDSECDYSCWPCCIFS	*	0	>TRINITY_DN25165_c4_g1_i9_Frame_F3
OK053_150	M	M-3a	MMLKMGVVLFVFLVLFPLATLQLNADQHVERYAENKQLLSPYERREIILHALGTRCCSWDVCDHPSCTCCSG	*	1	>TRINITY_DN24479_c0_g1_i5_Frame_R3
OK053_151	M	M-3a	LQLDADQPVERDAENKQDLNADERMTLLLEDGCCTRPRCTGACSCCQD	*	0	>TRINITY_DN24479_c0_g1_i7_Frame_R2
OK053_153	M	M-3a	LQLDADQPVERDAENKQDLNADERMTLLLYALGEDGCCTRPRCTGACSCCQD	*	0	>TRINITY_DN24479_c0_g1_i9_Frame_R2
OK053_154	M	M-3a	MMLKLRVVLFILLVLFPLTTLQLDADQPVERYVENKENLNPDERREIILPALR	No	0	>TRINITY_DN24479_c0_g1_i10_Frame_R3
OK053_155	M	M-3a	MMLKMGVVLFVFLVLFPLATLQLNADQHVKRYAENKQDLHPNERTGFILPAMRRRCCSLRRCEPHCHCCVQRH	*	1	>TRINITY_DN24479_c0_g1_i11_Frame_R3
OK053_160	M	M-3a	FLVLFPLATLQLDADKPVERYAENKQLLSPDERREIILHALGTRCCSWDVCDHPSCTCCG	*	0	>TRINITY_DN24479_c0_g1_i17_Frame_R2
OK053_174	M	M-3a	LDADQTVERYAENKQLLNPDERSGILLPALKKFCCDSDWCHLPECLCCNR	*	0	>TRINITY_DN24934_c7_g2_i14_Frame_F2
OK053_175	M	M-3a	QPVERYAENKQLLNPDERRGILLPALRQRVCCPFGGCHELCQCCEG	*	0	>TRINITY_DN24994_c3_g2_i7_Frame_F1
OK053_178	M	M-3a	LKMGVVLFIFLVLFPLATLQLDADQPVERYAENKQLLNPDERRGILLPALRKFCCDSNWCHISDCECCYG	*	0	>TRINITY_DN24994_c3_g3_i2_Frame_F1, >TRINITY_DN24994_c3_g2_i13_Frame_F3-TRINITY_DN24994_c3_g2_i11_Frame_F1
OK053_162	M	M-3b-WF	MSKLGVVLCIFLVLFPMATLQLDGDQTADRHADQRGQDLTEQQRNSKRVLKKRDWEYHAHPKPNSFWTLV	*	1	>TRINITY_DN24770_c3_g1_i2_Frame_F3
OK053_163	M	M-3b-WF	MSKLGVVLCIFLVLFPMATLQMDADQTADRHADERDQDLADQYRNLMRVLKRGWTHHVKVEPNSFWSLV	*	1	>TRINITY_DN24770_c3_g1_i4_Frame_F3
OK053_164	M	M-3b-WF	MSKLGVVLCIFLVLFPMATLQLDGDRTADRHADERGQDLAEQYGNLKHVMKRSSEHRAHHTHPHDNSFWTLV	*	1	>TRINITY_DN24770_c3_g1_i5_Frame_F1
OK053_185	N	N-1	MMSTLKMLLLTLLLLLPLATFDSDGQAIPGGGIPSAVNSRVRGDEKSGRSLEKRCSSGKTCGSVGPVLCCPRSDC	No	0	>TRINITY_DN23761_c2_g1_i2_Frame_R1
OK053_187	N	N-1	MSTLKMMLLILLLLLPMATFDSDGQAIPGGGIPSAVNSRVRGDEKSGRSLEKRCSSGKTCGSVGPVLCCPRSDC	No	0	>TRINITY_DN23761_c2_g1_i5_Frame_R2
OK053_188	N	N-1	MSTLKMLLLTLLLLLPLATFDSDGQAIPGSGIPGAVSSRVRRLLGGDKKSGRSLEKRCSSGKTCGNMGLVVCCPRSDCYCSVVNNGNFRKPVCVCP	*	1	>TRINITY_DN23761_c2_g1_i6_Frame_R2
OK053_189	N	N-1	MMSTLKMLLLTLLLLLPLATFDSDGQAIPGSGIPGAVSSRVRRLLGGDEKSGRSLEKRCSSGKTCGNVGPVVCCPRSDCYCSVVNNGNFRKPVCVCP	*	1	>TRINITY_DN23761_c2_g1_i7_Frame_R1
OK053_222	O1	O1-2	MKLTCVLIITVLFLTASQLITAHYSSDKRQYRAARLRDEMRNFKDARACGKEGERCLIRPCCPDLTCSGIIGGKCES	*	1	>TRINITY_DN24428_c3_g2_i1_Frame_F2
OK053_223	O1	O1-2	MKLTCVLIISVLFLTASQLITADFSRDKRQYRAARLRDEMRNFKGARDCGEQGQGCYTRPCCPNLVCRGGGTGGGVCQP	*	1	>TRINITY_DN24428_c3_g2_i2_Frame_F2
OK053_225	O1	O1-2	MKLTCVVIVAVLLLTTCHLITADDSRSTQKHRALRSETKLSMSTRCKGKGASCLRTAYDCCTGSCNRGRCG	*	1	>TRINITY_DN24428_c3_g3_i2_Frame_F2
OK053_226	O1	O1-2	MKLTCVVIVAVLFLTACQLITADDSRSTQKHRALRSTIKHSMLTRYCTPHGGHCGYHNDCCSHQCNINRNKCE	*	1	>TRINITY_DN24428_c3_g3_i3_Frame_F2
OK053_227	O1	O1-2	MKLTRVLIIAVLFLTACQLITSDYPRDEYRAVTSRFGVRNSKGSRECRESGQGCTRTAPCCPGLNCYGTRAGGRCS	*	1	>TRINITY_DN24428_c3_g4_i1_Frame_F2
OK053_228	O1	O1-2	MKLTCVLIIAVLFLTACQLTTAETYSRGRQKHRARRSTDKNSKWTRECTDSGGACNSHDQCCNEFCSTATRTCI	*	1	>TRINITY_DN24428_c3_g4_i2_Frame_F2
OK053_229	O1	O1-2	MKLTCVMIVAVLFLTACQLTTAEISSRGKQKHRVLRSADKNPKWTRECTRPGGACYYDSHCCRHVCHEVFNTCM	*	1	>TRINITY_DN24428_c3_g4_i3_Frame_F2
OK053_190	O1	O1-3	MKLTCMMIVAVLFLTAWTFATADDPRNGLGNLFSNAHHEMKNPEASKLNKRWCKQSGEMCNFTDQNCCDGYCILLFCT	*	1	>TRINITY_DN23678_c3_g1_i1_Frame_F2, >TRINITY_DN24303_c0_g1_i9_Frame_F2
OK053_191	O1	O1-3	MKLTCMMIVAVLFLTAWTFATADDSSNGLENLFSKAHHEMKNPEASKLNKRCVDQ	No	0	>TRINITY_DN23678_c3_g1_i4_Frame_F2
OK053_192	O1	O1-3	MKLTCMMLVAVLFLTAWTFVTANVSRNGLENLFPEERHEMMNPEAAKLNNRDCVKAGTACGFPKPEPACCSSWCIFVCT	*	1	>TRINITY_DN23678_c3_g3_i1_Frame_F2
OK053_193	O1	O1-3	TCMMIIAVLFLTAWTFATADDSGNGLENLFSKAHHEMKNPKASKLNKRCTQSGELCDVIDPDCCNKFCIIFFCI	*	0	>TRINITY_DN23710_c2_g1_i1_Frame_F3
OK053_194	O1	O1-3	MKMTYILIVAVLFLTAWTSVTAGDFKNKLKNLSLKARKEVENPKASKLHQKACVNRGDPCQRTVRCCSRRCGVNSCA	*	1	>TRINITY_DN23710_c2_g1_i2_Frame_F1
OK053_195	O1	O1-3	MKMTYILIVAVLFLTAWTSVTAGDFKNKLKNLSLKARKEVENPKASKLHQKGCVQTGGSCPSTTGCCNGLCNVDKCT	*	1	>TRINITY_DN23710_c2_g1_i3_Frame_F1
OK053_196	O1	O1-3	MKMTYILIVAVLFLTAWTFVTADDSGNGLENLFSKAHHEMKNPEASKLNKRCVDQFDPCDMIRHTCCVGVCFLMACI	*	1	>TRINITY_DN23710_c2_g1_i4_Frame_F1
OK053_198	O1	O1-3	KMKNPKASKLNKRCRLGAESCEVFSQNCCQGTCVFICLP	*	0	>TRINITY_DN23710_c2_g1_i7_Frame_F3
OK053_200	O1	O1-3	TCMMIIAVLFLTAWTFATADDSGNGLENLFSKAHHEMKNPEASKLNKRCVDQFDPCDMIRHTCCVGVCFLMACI	*	0	>TRINITY_DN23710_c2_g1_i10_Frame_F3
OK053_201	O1	O1-3	LFLTAWTFVTADHSKYGVENLFSEARDEMMNPEASKLDNKRGCIAHGKACVLPIITNALCCTGFCLFVCV	*	0	>TRINITY_DN23710_c4_g1_i1_Frame_R2
OK053_205	O1	O1-3	WTCATADDSGNGLENLFSNAHHEMKNPEASKLNKRCKEADEPCSIFSLDRCCSGVCFGICMS	*	0	>TRINITY_DN24303_c0_g1_i1_Frame_F2
OK053_206	O1	O1-3	WTCATADDSGNGLENLFSNAHHEMKNPEASNLNKRCAPFLHLCTFFFPNCCNGYCVQFICL	*	0	>TRINITY_DN24303_c0_g1_i2_Frame_F2
OK053_207	O1	O1-3	MKLTCMMIIAVLFLTAWTFATADDSSNGLENLSSKAHHKMKNPKASKLNKR	No	0	>TRINITY_DN24303_c0_g1_i3_Frame_F2
OK053_208	O1	O1-3	MKLTCMMIIAVLFLTAWTFVTAVPDSSNALENLYLKAHHEMNNPEDSELNKRCYDGGTSCNTGNQCCSGWCIFVCL	*	1	>TRINITY_DN24303_c0_g1_i7_Frame_F3
OK053_210	O1	O1-3	MKLTCMMIIAVLFLTAWTFATADDPRNGLGNLFSNAHHEMKNPEASKLNKRCKQADEPCSILSLDQCCSGVCFGICI	*	1	>TRINITY_DN24303_c0_g1_i10_Frame_F2
OK053_211	O1	O1-3	WTCATADDSGNGLENLFSNAHHEMKNPEASKLNKRWCKQSGEMCNLLDQNCCEGYCIVLVCT	*	0	>TRINITY_DN24303_c0_g1_i11_Frame_F2
OK053_212	O1	O1-3	WTCATADDSGNGLENLFSNAHHEMKNPEASKLNKRCKQADEPCSILSLDQCCSGVCFGICI	*	0	>TRINITY_DN24303_c0_g1_i12_Frame_F2
OK053_213	O1	O1-3	MKLTCMMIIAVLFLTAWTFATADDPRNGLGNLFSNAHHEMKNPEASKLNKRWCKQSGEMCNFTDQNCCDGYCILLFCT	*	1	>TRINITY_DN24303_c0_g1_i14_Frame_F1
OK053_214	O1	O1-3	MKLTCMMIVAVLFLTAWTLVMADDSNNGLANLFSKSRDEMEDPEAAKLEKKECQEKWDYCPIPFFGSRYCCYGLFCTLFFCA	*	1	>TRINITY_DN24303_c0_g3_i1_Frame_F2
OK053_215	O1	O1-3	MKLTCMMIVAVLFLTAWTLVMADDSNNGLANLFSKSRDEMEDPEASKLEKRDCHERWDWCPASLLGVIYCCEGLICFIAFCI	*	1	>TRINITY_DN24303_c0_g3_i3_Frame_F2
OK053_216	O1	O1-3	MKLTCMMIVAVLFLTAWTLVMADDSNNGLANHFLKSRDEMEDPEASKLEKRACSKKWEYCIVPILGFVYCCPGLICGPFVCV	*	1	>TRINITY_DN24303_c0_g3_i4_Frame_F2
OK053_217	O1	O1-3	MKLTCMMIVAVLFLTAWTLVMADDSNNGLANHFLKSRDEMEDPEASKLEKRACSKKWEYCIVPIIGFIYCCPGLICGPFVCV	*	1	>TRINITY_DN24303_c0_g3_i5_Frame_F2
OK053_218	O1	O1-3	MKLTCMMIVAVLFLTAWTLVMADDSNNGLANLFSKSRDEMEDTEASKLEKRDCHERWDWCPASLLGVIYCCEGLICFIAFCI	*	1	>TRINITY_DN24303_c0_g3_i6_Frame_F2
OK053_231	O1	O1-3	LTCMMIVAVLFLTAWTFVTAITRNGLENLFPKAHHEMKNPEASKLNKRCVPYEGPCNWLTQNCCDATCVVFWCL	*	0	>TRINITY_DN24728_c1_g1_i1_Frame_R1
OK053_241	O1	O1-3	MIVAVLFLTAWTFVTAVPHSSYVLENLYLKALHETENHEASKLNVRDDECEPPGDFCGFFKIGPPCCSGWCFLWCA	*	1	>TRINITY_DN25152_c0_g1_i1_Frame_R3
OK053_242	O1	O1-3	MIVAVLFLTAWTFVTAVPHSSYALENLYLKARHEMENPEASKLNTRDDCEPPGNFCGMIKIGPPCCSGWCFFACA	*	1	>TRINITY_DN25152_c0_g1_i3_Frame_R3
OK053_202	O1	O1-9	MKVSSVLIVAMLTLTAGQLVSASSHYSKEVQIPSSVRSADEVDNSENLSKRKCVEQGKICGLILFSTSCCGKLCLFGFCIL	*	1	>TRINITY_DN23795_c8_g2_i3_Frame_R3
OK053_203	O1	O1-9	MKVSSVLIVAMLTLTAGQLVSASSHYSKDVQILPSVRSADEVENSENVRLSKRRCVEQGEVCGLILFSSSCCGQLCLFGFCIL	*	1	>TRINITY_DN23795_c8_g2_i10_Frame_R3
OK053_251	O2	O2-2	KENIKFLLKRKRAADRGMWGKCKDGLTKCLAPSECCSGNCEQNCKMW	*	0	>TRINITY_DN24372_c5_g3_i2_Frame_R1
OK053_252	O2	O2-2	MQKLTILLLVAAVLMSIQALNQGDGVKSPREKINFLSKRKTTAESWWEGECSGWSVYCTSDAECCSGECGNHYCELF	*	1	>TRINITY_DN24372_c5_g3_i3_Frame_R3
OK053_253	O2	O2-2	MQKLIILLLVAAVLMSTQAVLQEKRPKEKIKFLSKKKTDAEKQQKRLCPDYTEPCSHAHECCSWNCHNGHCTG	*	1	>TRINITY_DN24372_c5_g3_i4_Frame_R2
OK053_256	O2	O2-2	ILLLVAAVLMSTQALIQSGAEKRPWENIRFLSKRQASWEVWWEGNCIEWLASCSTDEQCCSGACDAYCTLW	*	0	>TRINITY_DN24372_c5_g3_i7_Frame_R2
OK053_257	O2	O2-2	MQKLTILLLVAAVLILTQALIQGGGEKRLKEKIKFLSKRKTTAESWWEGECLGWSNGCTSPADCCSNSCDHYCEL	*	1	>TRINITY_DN24372_c5_g3_i10_Frame_R2
OK053_260	O2	O2-2	MQKLTILLLVAAVLMSTQALPQGGGEKRPRENIRFLSKRKTNAERWREGSCTSWLATCTHDQQCCTDVCYKRDYCALWDDR	*	1	>TRINITY_DN24372_c5_g3_i16_Frame_R2
OK053_261	O2	O2-2	MQKLTILLLVAAVLMSIQALNQRGGVKRPREMIKYLSKRKTALESWWENECSGWSVYCTKHSECCSDECIGYYCDLW	*	1	>TRINITY_DN24372_c5_g5_i1_Frame_R3
OK053_271	O2	O2-2	LIQEQRQKAKINLFSKREPSAERRQGGKRCIVLGSCTAHAECCSDFCALSECVSLY	*	0	>TRINITY_DN24386_c7_g1_i3_Frame_R2
OK053_272	O2	O2-2	MEKLTILLLVAAVLMSTQALNQEQHQRAKINLLSKRKPPAERWWRWGGCMAWFGKCSKDSECCSNSCDITRCELMRFPPDW	*	1	>TRINITY_DN24386_c7_g1_i6_Frame_R1
OK053_273	O2	O2-2	MEKLTILLLVAALLLSIQAVNQEKHQRAKINLLSKRKPPAERWWRWGGCMAWFGKCSKDSECCSNSCDITRCELMRFPPDW	*	1	>TRINITY_DN24386_c7_g1_i7_Frame_R1
OK053_274	O2	O2-2	MEKLTILLLVAAVLMSTQALNQEQHQRAKINLLSKRKPPAERWWRWGGCMAWFGRCTKDSECCSNSCDITRCELMRFPPDW	*	1	>TRINITY_DN24386_c7_g1_i8_Frame_R2
OK053_275	O2	O2-2	MEKLTILLLVAAVLMSTQALNQEQQQRAKINLLSKRKPPAERWWECSIWFSRCTKDSECCSNSCDKTYCELMPFPPDW	*	1	>TRINITY_DN24386_c7_g1_i10_Frame_R1
OK053_278	O2	O2-2	MEKPTILLLVAAVLMSTQALIEEQRQKAKINLFSKRKPSSERRYSGCKLWGPCTVDAECCSGCGEISCSLLR	*	1	>TRINITY_DN24387_c1_g1_i1_Frame_F2
OK053_279	O2	O2-2	MEKPTILLLVAAVLMSTQALLQEQRQKAKINLFSKREPSAERRRGDKGCIEWGPCTAHAECCSAYCGETECIFLL	*	1	>TRINITY_DN24387_c1_g1_i3_Frame_F2
OK053_281	O2	O2-2	MEKPTILLLVAAVLMSTQTLIQGGGEKRPKEKINFLSKRKTAAESRWEEECSPW	No	0	>TRINITY_DN24387_c1_g1_i8_Frame_F2
OK053_282	O2	O2-2	MEKPTILLLVAAVLMSTQALIQEQRQKAKINLFSKREPSAERRRGDKGCIEWGPCTAHAECCSAYCGETECIFLL	*	1	>TRINITY_DN24387_c1_g1_i9_Frame_F2
OK053_283	O2	O2-2	MENLTILLLVAAVLTSTQALIQGRGERQKAEINFLSKRKSTFWRWWDGDCRTWNAPCNPGVECCFGRCSHRRCVFW	*	1	>TRINITY_DN24582_c0_g1_i1_Frame_R1
OK053_284	O2	O2-2	MENLTILLLVAAVLTSTQALIQGRGERQKAEINFLSKRKSTFWRWWDGDCRTWNAPCNPGVECCTDVCRHGRCVWW	*	1	>TRINITY_DN24582_c0_g1_i3_Frame_R1
OK053_285	O2	O2-2	MEKLTILLLVAAVLMSTQALIQDQRQRAKINLFSKRQPYARDWWEDDGCSVWGPCTVNAECCSGDCHETCIFGWEL	*	1	>TRINITY_DN24582_c0_g1_i10_Frame_R2
OK053_286	O2	O2-2	RWGGCMAWFGKCSKDSECCSNSCDVTRCELYPFPSRY	*	0	>TRINITY_DN24582_c0_g4_i2_Frame_R1
OK053_288	O2	O2-2	LKRKSAADRGMWGECKDGLTTCRAPSECCSEDCEGSCAMW	*	0	>TRINITY_DN24582_c1_g1_i1_Frame_R2
OK053_289	O2	O2-2	MEKLTILLLVAAVLMSTQALIQEQRQKAEINLFSKRKPSAERWWVDSECNSFWGSCTVDADCCFNSCDETYGYCWPSF	*	1	>TRINITY_DN24912_c6_g1_i5_Frame_R1-TRINITY_DN24387_c1_g1_i4_Frame_F1
OK053_290	O2	O2-2	MEKLTILLLVAAVLMSTQAMFQGDGEKSRKAEINFSETRNLARNKQKRCKTYSKYCEADSECCTEQCVRSYCTLFG	*	1	>TRINITY_DN24954_c0_g1_i2_Frame_F2
OK053_291	O2	O2-2	MQKLIILLLVAAVLMSTQALFQEKRTMKKIDFLSKGKADAEKQRKRNCSDDWQYCESPSDCCSWDCDVVCSG	*	1	>TRINITY_DN24954_c0_g1_i4_Frame_F3
OK053_292	O2	O2-2	MEKLTILLLVAAILMSTQALVERAGENRSKENIKFLLKRKRAADRGMW	No	0	>TRINITY_DN24954_c0_g1_i6_Frame_F1
OK053_293	O2	O2-2	MEKLTILLLLAAVLMSTQALIQGGVEKSPKEKIRGFSEIWYTIWRWYHGKCKGWSNGCVRHSECCSYNCKGMYCDI	*	1	>TRINITY_DN24954_c0_g1_i8_Frame_F3
OK053_295	O2	O2-2	MEKLTILLLVAAVLMSTQALFQEKRTMKKIDFLSKGKADAEKQRKRNCSDDWQYCESPSDCCSWDCDVVCSG	*	1	>TRINITY_DN24954_c0_g1_i11_Frame_F3
OK053_296	O2	O2-2	MEKLTILLLVAAVLMSTQALVERAGENRSKENIKFLLKRKRAADRGMWGDCKDGLTTCFAPSECCSEDCEGSCTMW	*	1	>TRINITY_DN24954_c0_g1_i12_Frame_F1
OK053_297	O2	O2-2	MEKLTILLLVAAVLLSTQALNQEKRPKEMINFLSKGKTNAERRKRQCEDVWMPCTSNWECCSLDCEMYCTQIG	*	1	>TRINITY_DN24954_c0_g1_i13_Frame_F2
OK053_298	O2	O2-2	MEKLTILLLVAAVLLSTQVLVQGDEENPLKPMIYFILTGRAIPGNTPKSCDQTGEPCVLNEQCCYGWCTNYGTCY	*	1	>TRINITY_DN24954_c0_g3_i1_Frame_F3
OK053_299	O2	O2-2	VAAVLMSTQTLIQGGGEKRPKEKINILSKRKIPAKRGRNDYCTEWLLPCRRDSECCSNFCLEYSCML	*	0	>TRINITY_DN29629_c0_g1_i1_Frame_F1
OK053_263	O2	O2-WF	MGKLTILVLVAAALLSTQIMVQGDGDQPADRDAVPRDNIPGGTSEKFMNVLQRRECPWKPWCG	*	1	>TRINITY_DN24380_c0_g1_i2_Frame_F1
OK053_267	O2	O2-WF	MGKLTILVLVAAILLSTQVTVQGDRDQPADRNAVPRDDNPGRATRKFMKVLQGRGSECPWKPWCG	*	1	>TRINITY_DN24380_c0_g1_i7_Frame_F1
OK053_268	O2	O2-WF	MGKLTILFLVAAALLSTQVMAQGDGDQPADRDAVPRDDNPAGTIEKFMNLLRQVRCQWTPACG	*	1	>TRINITY_DN24380_c0_g1_i11_Frame_F1
OK053_269	O2	O2-WF	MGKLTILFLVAAALLSTQIMVQGDGDQPADRDAVPRDNKPGGTSGQFMTFLRQVRCRMTPLCR	*	1	>TRINITY_DN24380_c0_g1_i13_Frame_F1
OK053_300	O3	O3-2	MSGLGIMVLTLLLLVSMATSHTDRGVGLLMPRDGLQERTCTSDDDCGDLQCCPDTVDKPEGRCDSDCTIY	*	1	>TRINITY_DN20932_c0_g1_i1_Frame_R2
OK053_301	O3	O3-WF	MSGLGIMLLALLLLVSLETSLQGGGEGQTMHRGKYKQGRRRILLRRALQKLRTPPQGTKKSASLDFLVPAVFA	*	1	>TRINITY_DN24720_c10_g1_i3_Frame_R1
OK053_304	P	P-1a	MHLSLARSAVLMLLLLFALGNFVGVQPEQITRDVDNGQLTDNRRNLQSEWKPVSLFMSRRSCHKPCQNHYECASHCICLIGECNDAG	*	1	>TRINITY_DN24970_c6_g1_i2_Frame_R2
OK053_305	P	P-1a	LLLLYALGNFVGVQPEQITRDVDNGQLTDNRRNLQSEWKPVSLFKSLYKRLPRFESCEQDSDCDFLYFCWNNECHKIFLI	*	0	>TRINITY_DN24970_c6_g1_i3_Frame_R3
OK053_306	P	P-1a	MHLSLARSAVLMLLLLFALGNFVVVQSGQITRDVDNGQLTDNRRNLQSKWKPVSLFKSLYKRLPRFESCEQDSDCDFLYFCWNNECHLLGFQRLWSQP	*	1	>TRINITY_DN24970_c6_g1_i4_Frame_R2
OK053_307	P	P-1a	MHLSLARSAVLMLLLLFALGNFVVVQSGQITRDVDNGQLTDNRRNLQSKWKPVSLFMSRRSCNNSCNVPSDCESHCICTFRECKIILI	*	1	>TRINITY_DN24970_c6_g1_i6_Frame_R2
OK053_308	P	P-1a	MHLSLARSAVLMLLLLFALGNFVVVQSGQITRDVDNGQLTDNRRNLQSKWKPVSLFKSLYKRLPRFESCEQDSDCDFLYFCWNNECHVSRGDKGVAHTAA	*	1	>TRINITY_DN24970_c6_g1_i11_Frame_R2
OK053_309	P	P-1a	MHLSLARSAVLMLLLLFALGNFVVVQSGQITRDVDNGQLTDNRRNLQSKWKPVSLFMSRRSCNNSCNEHSDCESHCICTFRGCGAVNG	*	1	>TRINITY_DN24970_c6_g1_i13_Frame_R2
OK053_310	P	P-1a	MHLSLARSAVLMLLLLFALGNFVVVQSGQITRDVDNGQLTDNRRNLQSEWKPVSLFMSRRSCHKPCQNHYECASHCICLIDTCNDAG	*	1	>TRINITY_DN24970_c6_g1_i16_Frame_R2
OK053_311	P	P-1a	LLLLYALGNFVGVQPEQITRDVDNGQLTDNRRNLQSEWKPVSLFMSRRSCHKPCQNHYECASHCICLIDTCNDAG	*	0	>TRINITY_DN24970_c6_g1_i18_Frame_R3
OK053_080	Pmag_02	Pmag_02	MKAVAVFLVVALAVAYGQFFCPDSENDPLNCVETMGTLATCMKSKSGKSYSYACGYCGKKKESCFGDKVPVDGYDCQVRNIANPCGGSAL	*	1	>TRINITY_DN24591_c2_g1_i1_Frame_R2
OK053_083	Pmag_02	Pmag_02	MKTVAVFLVVALAVAYGQFFCPDSEDDPLNCLETQATSATCMKSTEDETYSYVCGYCGKKKESCFGKKVPTSDYNCQIHKIPNHCGGPVM	*	1	>TRINITY_DN24591_c2_g2_i1_Frame_R1
OK053_084	Rimp_01	Rimp_01	MARLLSMLLCIAVAVVLAAGIQYSAESPMQQCSTHAVSKMEVYSNNQGKYELLDSYCSCDSGEAYFEAQDTTTSSSTVSSYKIYVCGMPTESCTGGTLPVTDSDNGPRRMQCTCGQYKYFISASLGWHVRCK	*	1	>TRINITY_DN13871_c0_g1_i2_Frame_R3
OK053_077	Rmil_02	Rmil_02	MRFYLLLTVTLLLTLSTGGDAGPRRANGLPKHFVLRTCTGNCRLCGAICCCEPKVCRNNQCIDDK	*	1	>TRINITY_DN19133_c0_g1_i1_Frame_R3
OK053_078	Rmil_02	Rmil_02	MEFRRLVTVALLLALVLSIDAEPMQGMEAEGHFVRRDCGEGCGTCGGGCCCIPDSCVDSQCQSHVGPN	*	1	>TRINITY_DN21363_c0_g1_i1_Frame_R2
OK053_314	S	S-1a	FARGCTFSCEYQDNRCRGECHCPGKTSCYCTSGHHNKGCGCAC	*	0	>TRINITY_DN24299_c5_g1_i1_Frame_F2
OK053_315	S	S-1a	MSKMGAMFVLLLLFTLASSRREGDIQARKTHLKSDFYRTLPRFARGCTISCGYEDNRCQGECHCPGKTNCYCTSGHHNKGCGCAC	*	1	>TRINITY_DN24299_c5_g1_i13_Frame_F2
OK053_319	T	T-1	MRCLPVFVILLLLIAFTPSVDARPKTKDDMPLASFNDNAKRILQILSRKPCCSIHDSSCCGLG	*	1	>TRINITY_DN24051_c1_g1_i1_Frame_R3
OK053_322	T	T-1	MRCLPVFVILLLLIASIASDTVQLKTKHDMPLASFHGNAMRILQMLSNNRYCCIFDHSCCLWP	*	1	>TRINITY_DN24051_c1_g1_i4_Frame_R3
OK053_325	T	T-1	PVFVILLLLIASVPSVDAQLKTKDDMPLASSHAKVKRMLQILRNKRCCITMELCCEMETD	*	0	>TRINITY_DN24051_c1_g1_i7_Frame_R1
OK053_327	T	T-1	MCCLPVFVILLLLIASAPSVDAQPKTKDDVPLAPFHDNIKSTLQTLRKKFCCRPVTPCCAGK	*	1	>TRINITY_DN24051_c1_g1_i9_Frame_R3
OK053_328	T	T-1	MCCLPVFVILLLLIASAPSVDAQPKTKDDVPLAPLHDNAKSALQHLNQRCCQTFYWCCVQGK	*	1	>TRINITY_DN24051_c1_g1_i10_Frame_R3
OK053_331	T	T-1	MLCLPVFVILLLLIASTPRVDARRKTKDNMPLAPFHENAKSTLQILLNKRQCCPTFSDCCEIEEEFGLK	*	1	>TRINITY_DN24651_c1_g5_i1_Frame_F1
OK053_332	T	T-1	MRCLPVFVILLLLIASAPSVDARMKPKDMPLASSQANVKGIHHILQIKNMCCGFKPYCCNW	*	1	>TRINITY_DN24652_c2_g1_i2_Frame_F1
OK053_334	T	T-1	ILLLLIASIASDTVQLKTKHDMPLTSFHGNARQTLQMLLYKRHCCFIDTPCCEW	*	0	>TRINITY_DN24652_c2_g1_i5_Frame_F1
OK053_335	T	T-1	MRCLPVFVILLLLIASTPSVDAQLKTKDDMPQASFHDNAKRDLQRLLRTSDCCFYHNCCC	*	1	>TRINITY_DN24652_c2_g1_i12_Frame_F1
OK053_336	T	T-1	MHCLPVVVILLLLTASGGPSVDAGLKTKDDVPLSSFRDNTKSILQRLWKRGNCCEFWEFCCD	*	1	>TRINITY_DN24656_c2_g2_i2_Frame_F3
OK053_339	T	T-1	MRCLPVLIILLLLTASAPGVDVLPKTEDDMPLSSVYGNGKSILRGILRKGICCGVSFCYPC	*	1	>TRINITY_DN24656_c2_g2_i6_Frame_F3
OK053_340	T	T-1	LPVVVILLLLTASGPSVDAGLKTKDDVPLASFLDNAKGTRQTSCCPDMPLCCVGIGK	*	0	>TRINITY_DN24656_c2_g2_i12_Frame_F3
OK053_341	T	T-1	MRCLPVLIILLLLTASAPGVDVLPKTEDDMPLSSVYGNGKSILRGILRKDVCCGFRMCHPC	*	1	>TRINITY_DN24656_c2_g2_i13_Frame_F3
OK053_342	T	T-1	PSVDAGLKTKDDVPLSSFRDNAKSIQQRQSTHYCCMYRLWCCR	*	0	>TRINITY_DN24656_c2_g2_i14_Frame_F2
OK053_347	T	T-1	MRCLPVFVILLLLIASAPSVDARPKTKDGMPLASFHDNATRNLQILCCKHTLSCCTGK	*	1	>TRINITY_DN24892_c8_g1_i5_Frame_R2
OK053_349	T	T-1	MRCLPVFVILLLLIASAPSVDARLKTKDDMPLASFHANVKRTLQILRDKRFCCRTQEVCCEVIKNG	*	1	>TRINITY_DN24892_c8_g1_i7_Frame_R1
OK053_350	T	T-1	MRCLPVFVILLLLIASAPSVDARLKTKDDMPLPSSHANIKRTLQIHRNKRCCPGWELCCEWDEW	*	1	>TRINITY_DN24892_c8_g1_i9_Frame_R1
OK053_351	T	T-1	MRCLPVLIILLLLTASAPSVDALLKTKGGVLRSSFRGNPERTRQKLSNNIRAWCHPCPFEYGQ	*	1	>TRINITY_DN24892_c8_g1_i10_Frame_R2
OK053_352	T	T-1	MRCLPVFVILLLLIASAPSVDALLKTKGGVLRSSFRGNPERTRQKLSNNIRAWCHPCPFEYGQ	*	1	>TRINITY_DN24892_c8_g1_i12_Frame_R2
OK053_354	T	T-1	MRCLPVFVILLLLIASAPSVDARLKTKDDMPLASFHANVKRTLQKLLNKRCCQIVPQCCEWN	*	1	>TRINITY_DN24892_c8_g1_i16_Frame_R1
OK053_355	T	T-1	MRCLPVFVILLLLIASAHSDTVPLKTKDDMPQASFHGNARRTLQMLSKKGCCSYFDVSCCLWP	*	1	>TRINITY_DN24892_c8_g1_i17_Frame_R2
OK053_357	T	T-1	MCSLPVFIILLLLIPSAPSADVQPKTKDDVPLSSFRDNTKSTLQRLLKRVNCCPIDESCCS	*	1	>TRINITY_DN24892_c8_g4_i1_Frame_R3, >TRINITY_DN24656_c2_g2_i4_Frame_F3
OK053_361	T	T-1	MRCLPVFVILLLLIASTPSVDARAKTRDDMSLASFHDDAKRILQILSMKRCCSIHDNSCCGLG	*	1	>TRINITY_DN25117_c1_g1_i2_Frame_R2
OK053_317	T	T-3	MLCLPVFIILLLLASPAAPKSLETRIQNDLIRAGLTDADLKTEKGFLSGLLNVAGSVCCKVDTSCCSNQ	*	1	>TRINITY_DN21898_c0_g1_i1_Frame_R3
OK053_040	Tpra_06	Tpra_06	MLSMLAWTLMTAMVVMNAKSQTTCPTSTNIDSCVNDNNACGKDVSGNCSSLCNCGNGQTCSTDSSHTITLVPYYTEDGPYEKKYYTCGDPSELDECYDIDKALEVNESDDPNSVEVLCHCPSDQIYLWIHLQYYICTPPPQPDI	*	1	>TRINITY_DN22356_c0_g1_i1_Frame_R1
OK053_041	Tpra_06	Tpra_06	MLSMLAWTLMTAMVVMNAHGQFCPTMTDSRPGENKCLHDNYLCGKEDDSGSCTSLCYCKSGQMCFRDNDHTITAVPRIINDRPVEITYYTCVALSSLNECSGIQEALKVLSPEAEEGESSVEVLCRCPSPK	No	0	>TRINITY_DN22356_c0_g1_i2_Frame_R3
OK053_027	U	U-2	RLFDHVLLKGQRNCPYCVVYCCPPSFCQSSGCHPPI	*	0	>TRINITY_DN23742_c6_g2_i2_Frame_F2
OK053_028	U	U-2	MIRMGFFLTLTVAVLLTSLTCTEAVPTDKREMERLFDHVLLKGQRNCPYCVVYCCPPAYCQASGCRPP	*	1	>TRINITY_DN23742_c6_g3_i1_Frame_F3
OK053_364	V	V-1a	MAAPRMMSFILLLLLSLAIHCADGKAVQGDGDPSASLLTGDKNHDLPVKRDCTTCSGEECCGRCTCSWGNCNCISWGK	*	1	>TRINITY_DN23045_c3_g1_i1_Frame_F1
OK053_365	V	V-1a	MAAPRMMSFILLLLLSLAIHCADGKEVQGDGDPSASLLTGDQNHDLRVKRACITCNGEECCGKCTCLWGDTCSRSGWGK	*	1	>TRINITY_DN23045_c3_g1_i2_Frame_F3
OK053_366	V	V-1a	MAAPIMMSFILLLLLSLAIHCADGKAVQGDGDPSASLLTGDQNHDLRVKRACITCNGEECCGKCTCLWGDTCSRSGWGK	*	1	>TRINITY_DN23045_c3_g1_i5_Frame_F3
OK053_367	Y	Y-1	MQKAIVLILAILLLLPLSTAQDDEGSQENAAPRKRDTASQCGGTGTHCNEPEGQNCCTSLKCVNNCCWTTTEGCPS	No	0	>TRINITY_DN45887_c0_g1_i1_Frame_R3
Hormones
OK053_373	Conopressin / Conophysin	Conopressin / Conophysin 1	MGRLTLALCLLLLLLLTTQACFIRNCPSGGKRDVDERHPTKACMNCTFGQCVGPQVCCGAGGCEMGTAEANRCSEEDEDPIPCLVIGAHCSLNNPGNIHGNCVAHGICCVDDTCAIHFGCL	*	1	>TRINITY_DN23698_c13_g1_i1_Frame_F1
OK053_375	Conopressin / Conophysin	Conopressin / Conophysin 1	QACFIRNCPKGGKRDVDERQLVHACMFCSFGQCVGPHICCGDGGCQMGTPEANRCSQEDESPIPCQVIGNHCSLNNPGNIHGHCVAYGICCVDDTCTTHSGCL	*	0	>TRINITY_DN50973_c0_g1_i1_Frame_R3
OK053_376	Conorfamide	Conorfamide	MSGRGFLLLALLLLVTVEATKVEKKHSGILLAWSGPRNRFVRFGRRDMQSPLLSERLRF	*	1	>TRINITY_DN24820_c0_g1_i2_Frame_R1
OK053_377	Conorfamide	Conorfamide	MSGRGFLLLALLLLVTVEATTVEKNKPGVLDIPVKSNSDDDSIFRYGRRDMQSPLLSERLRF	No	0	TRINITY_DN24820_c0_g1_i4_R2
OK053_455	Conorfamide	Conorfamide	MSGRGFLLLALLLLVTVEATTVEKNKPGVLDIPVKSNSDDDSIFR	No	0	>TRINITY_DN24820_c0_g1_i3_Frame_R2
OK053_384	Insulin	Insulin-related peptide 5	MTTSSYFLLVALGLLLYVCQSSFGGEHVCGSNQPNHPNGKCGSKMADYLEEQCEEEEAAQGGTNDARATTGRALSLSKRRGFLSMLKRRGKRNEASPLQRAGRGIVCECCKNHCTDEEFTEYCPHVTESG	*	1	>TRINITY_DN24814_c4_g1_i2_Frame_F2
OK053_385	Insulin	Insulin-related peptide 5	MTTSSYFLLVALGLLLYVCQSSFGGEHVCWLGDPNHPQGVCGPQVANIVEIRCEEKEAEQGGANNARANTGRTSSLMKRRGFLSLLKKRGKRDEGSPLQRSGRGIVCECCKHHCTKEEFTEYCH	*	1	>TRINITY_DN24814_c4_g1_i6_Frame_F2
OK053_431	Prohormone-4	Prohormone-4a	GAALNPYSAMGYGAYPMWPAQFAHMWPLHPYYQTVMPAQEGMCSYDRPFKCWGSATCIAIEAICDKNFDCNNHADEDPRICVAGRRPSYDILVSYLMLPNQHWMLQKLFNNVDPYTAAHALKLATSLGDLRWSLALTDENINNTKTVLEAVENDNKGPLVSLGMQASAWESVKFLMKNLLSTDFFSD	*	0	>TRINITY_DN23909_c2_g4_i1_Frame_F1
OK053_432	Prohormone-4	Prohormone-4a	GMYSSYFLPPYQPSAALQALYPPYGYAAGVPGGMAWSQFGGAAWNPNFAMGYGGYPLWPSQFAHMWPMHPYYQTAVPAQEGVCSFDRPFQCWGSFTCVTIDAICDKTFDCTNHADEDPRICIAGRRPDYGILVWYLALPDQQWMLQKLFNNVDPYTTAYALKLATTLGDLRWSLALTDENINNTKTVLQAVKNDDKEPLIALGMPTSAWESVKYLMNSLLSTDFFLD	*	0	>TRINITY_DN23909_c2_g5_i1_Frame_F1
OK053_429	Prohormone-4	Prohormone-4b	MSSPLRMDVTFLLVAIAVTWVCGLGIGFPGFSVSPRSFIQHPKRASCPENSCDFASPFQCGEMQTCIRLFQVCDGLWHCENGFDEDLAVCAAVLRPLECAIWEFLEEQSDWILPELFNNADSDLVAPVLHGAYSMGDLQSILNLTAQNIENIRNSTRGAIEGDERPLLALGMPEGAWNDVRYLLEELYKLGLDVWTE	*	1	>TRINITY_DN23909_c2_g2_i1_Frame_F3
OK053_430	Prohormone-4	Prohormone-4b	MSSPLRMDVTFLLVAIAVTWVCGLGIGFPGFSVSPRSFIQHPKRSSCPGSPCNYSTPFLCAENQFCIRLDRVCDDMWDCVNGSDEDPYLCTAARRPPEDDIREFLEQQREWILPQLFNDKDPALVAYVLTLAHTMGDLQSTLDLTPQNRENIYNATETVIEGDERFLLSLGMPSRAWPEVKYLLETLLEGGLNVWVD	*	1	>TRINITY_DN23909_c2_g2_i4_Frame_F3
OK053_438	Thyrostimulin hormone alpha	Thyrostimulin hormone alpha	MGRRDSGRAVAQRYRGVTRGVTVIACLMAVCACVGLCDATGRKRHSWEAPGCHLVGHTRVVRIPDCVPFQITTNACRGFCVSYAIPSPYQTLAYNPNHIITSRAACCDIIDTLDIPVQVTCMDGVKDIVFKSARSCACSICRRE	*	1	>TRINITY_DN24745_c8_g3_i1_Frame_F3
OK053_439	Thyrostimulin hormone beta 5	Thyrostimulin hormone beta 5	MVMPLVLSLALTPPPLCHATLVDPSTTLECHVRSYTYRATKPSIINENGDLVTCQGNVRVNSCWGRCDSSEIGDYKMPFKISNHPVCTYTGRVSRTVSLSQCVGYPDPTVQVFDATGCSCQFCNSETTSCENLNG	*	1	>TRINITY_DN24745_c8_g1_i1_Frame_F1
Other proteins
OK053_086	CAP-superfamily	CAP-superfamily-1	MLSTMQTVGAVLMLSIVLVAGRKRHHCDSKYYELTPAHTMCLTDKPNAVAVPLTQEVTHEIVEMHNAIRADVRNAANMLKMEWDERLATVAQKWAMQCILRHDSGRRGEPDLPGFVGQNVAWSSGDLTFLEAVQLWANEIVDFQYGVWTYGTGHYIQQVFAGASRIGCGQSACGNDKYFVCNYYTGTMGDTPYELGAQCSQCRASCQNIRGSNGRWGRLCDCTNGPDACFNGGYFNINTCQCECYGIWRGADCQEK	No	1	>TRINITY_DN24346_c6_g1_i5_Frame_R1
OK053_087	CAP-superfamily	CAP-superfamily-1	WAMQCILNHDGFANRAEPDLPGYVGQNVGWSSYHMTFPDVVDLWAAEIEDYEYGVWTNITGHYIQQIYAEASRIGCGQSACGEDRYFVCNYYKSTMGNTPYAQGSRCGQCPNSCWEELCDCTSGPDACCNGGSLNIDTCECQCPRLWSGADCQEKQCPDHDYEDMCDYPDVVNNPEYWCQFSNIRSDCPIRCGDCP	*	0	>TRINITY_DN24346_c6_g1_i7_Frame_R3
OK053_369	Conodipine	Conodipine-2	MKMLESALWILAALAMPWIAAQDYSTAELCRINSNDCSVPFSWIPCQQHFLAACDRHDTCYLCGAHFNFTQDDCDNAFLRDMTALCANGTDDEGFCLQKRKRRETSSMSITTPLRQPRLLEKLMPQTSLSHRDPRQLHRRVATCTEWALIYFNTVQFFGWWYFYDTADATYCPHFEACMPEV	*	1	>TRINITY_DN17431_c0_g2_i1_Frame_R2
OK053_380	Ferritin	Ferritin	MSQVRQNFHEECEAAINRQINLQKYADYVYMSMSFYFDRDDVSLKGFHEFFKKKAHEECGYAEKLMEYQNMRGGRILLQTVKKPDRDDWGSGLEALQAALQLEKSINQSMMELHQCASCHNDPQMSDFVEDNFLKEQVETIKEISDYITNLKRVGTGLGEFIFDKETLQEKQE	*	1	>TRINITY_DN23301_c3_g4_i1_Frame_R1
OK053_381	Ferritin	Ferritin	MALNVSQCRQNYHAESEAGVNRQINMELYACYCYQSMSFYFDRDDVALPGFAKYFKEMSDEEREHAEKLMKFQNKRGGRIVLQDIKKPDRDEWGTGLDAMQVALGLEKSVNQALLDLHEVATSHKDAQMTDFLEGEYLQEQVESIKKIGDHITNLKRVGSGLGEYMFDKNLS	*	1	>TRINITY_DN24658_c0_g1_i2_Frame_F1
OK053_382	Ferritin	Ferritin	MALNVSQCRQNYHAESEAGVNRQINMELYACYCYQSMSFYFDRDDVALPGFAKYFKEMSDEEREHAEKLMKFQNKRGGRIVLQDIKKPDRDEWGTGLDAMQVALGLEKSVNQALLDLHEVATSHKDAQMTDFLEGEYLQEQVESIKKIGDHITNLKRVGTGLGEYMFDKNLS	*	1	>TRINITY_DN24658_c0_g1_i3_Frame_F2
OK053_383	Ferritin	Ferritin	MAVSQCRQNYHAECEAGINRQINMELHASYCYQSMAFYFDRDDVALPGFAKFFRKSSEEEREHAEKLMTFQNQRGGRIVLQDIKKPDRDEWGSGLDAMQVALALEKSVNQSLLDLHEVATSHNDAQMTDFLEGNYLQEQVRSIKELGDYITNLKRVGPGLGEYMFDKETLQE	*	1	>TRINITY_DN24658_c0_g2_i1_Frame_F3
OK053_387	Lysozyme	Lysozyme	MKWVGFLVWCGLLFCVRGSDVPCRQAGGTCQHNSIYCSGSYRRNMCAGSARRQCCIPASSGSDTPCINQGGTCQYDNRQCSGQYQSNLCSGAANRRCCIPSHSSSGSSHSSGGYNCYGNFMNLHPTGASAQTASQDGIDHGGVSASQRMVANDIHELNKRKHCYIQAGNNNCVHPAVIAGIASRESRGGAVINRTEGWGDNHNAYGIMQCDGGASGLGSRCTRYPWNSCEHINMMVEILLVPYIRTMQTKHRSWAPEQQLQGAVSAYNAGTGNVRTFHRMDEGTTGNDYSNDVMARAQHLVNRFGW	*	1	>TRINITY_DN23781_c5_g4_i1_Frame_R2
OK053_390	Neuropeptide F	Neuropeptide F	MQKAQLSALLVISLVVAQMTCVHSLRRPQRPARFTSAAQLRRYLRALNQYYAIVGRPRFGRNVDSNKKSVKDLGDLKPNE	*	1	>TRINITY_DN23359_c12_g1_i5_Frame_F3
OK053_394	PDI-A2	Protein Disulfide Isomerase (PDI-A2)	MKFSSCLVLTLLVFVSAEDVEQDENVHVLTKKNFDSFITDNEFVLVEFYAPWCGHCKALAPEYAKAARTLENEKSNIKLAKVDATVEGDLASKFDVRGYPTIKFFRKEKPDGPADYNGGRQAQDIVDWLKKKTGPPAKELKEKDEVKAFVENNEVVVIGFFKDQESTGALAFKKAAAGIDDIPFAITSEDHVFKEYKMDKDGIVLLKKFDEGRNDFEGDLEEEAIVKHVRENQLPLVVEFTQESAQKIFGGEVKNHILLFLKKEGGEDTIEKFRGAAEDFKGKVLFIYLDTDNEENGRITEFFGLKDDEIPAVRLIQLAEDMSKYKPESSDLETATIKKFVQDFLDGKLKPHLMSEDVPGDWDAKPVKVLVGKNFKEVAMDKSKAVFVEFYAPWCGHCK…	*	1	>TRINITY_DN24046_c8_g1_i1_Frame_F2
OK053_395	PDI-A2	Protein Disulfide Isomerase (PDI-A2)	YPTIKFFHKEKPKSPTDYVGGRQAADIVNWLKKKTGPPAKELKEKDEVKAFVENNEVVVIGFFKDQESTGALAFKKAAAGIDDIPFAITSEDHVFKEYKMDKDGIVLLKKFDEGRNDFEGDLEEEAIVKHVRENQLPLVVEFTQESAQKIFGGEVKNHILLFLKKEGGEDTIEKFRGAAEDFKGKVLFIYLDTDNEENGRITEFFGLKDDEIPAVRLIQLAEDMSKYKPESSDLETATIKKFVQDFLDGKLKPHLMSEDVPGDWDAKPVKVLVGKNFKEVAMDKSKAVFVEFYAPWCGHCKQLAPIWDELGEKYKDSKDIVVAKMDATANEIEEVKVQSFPTLKYFPKDSEEAVDYNGERTLDAFVKFLESGGTEGAGVQEDEEEEEEDEEGDDEDLPR…	*	0	>TRINITY_DN24046_c8_g1_i2_Frame_F2
OK053_397	PDI-A2	Protein Disulfide Isomerase (PDI-A2)	FVKKEGAKDTLDTFKAAAGEFKGKVLFIYLDTTKEENEHIMGFFGLKAADAPAMRLIQLGEGLAKYKPESDSLDKSTITKFVQDFLDGKLKPDLKSEEVPENWDAQPVKVLVSKNFKEVAMDKSKAVFVEFYAPWCGHCKELAPIWDQLGEKFKDSKDVIIAKMDATANELEDLQIKSFPTLQYFPKGSDEIIEYDGERTLKELIKFVESGGKQEPPKKEEEEKEEDDDKKKDEL	*	0	>TRINITY_DN25097_c5_g1_i1_Frame_R1
OK053_399	PDI-A2	Protein Disulfide Isomerase (PDI-A2)	MKFATVFSLTLLALVACEEVEQEEKVYVLKTKNFDNFIKENEFVLVEFYAPWCGHCKKLAPEYSEAAGKLMDDGSNIKLAKVDATVEKDLAEKFEVKGFPTIKFFISGEPVDYTGGRQTSDIINWLKKKTSPPAKEVKTCEEAKTFIDSDEVIVMGFFKDQEGKGAAAFKKIAAEIDDVAFGITSEDNVFKEHKMKKDGVVLFKKFDEGRNDFSGDFEEAAMSKFIKDNYLPLINEFTQDTAQKLLSGDVKSYLMLFVKKEGAKDILDTFKAAAGEFKGKVLFIYLDTAIEENERVMEVFGLKAADTPAMCLIQLDEDLVKYKPESDSLDKSTITKFVQDFLDGKLKPHLKSQEVPEDWDAQPVKVLVSKNLKEVAMDKSKAVFVEFYAPWCGHCKELA…	*	0	>TRINITY_DN25097_c5_g1_i6_Frame_R3
OK053_400	PDI-A2	Protein Disulfide Isomerase (PDI-A2)	MKFATVFSLTLLAFVACEEVEREENVYVLKATNFDNFIDENEFVLVEFYAPWCGACKNLAPVYSEVAKKLMDEGSNIKLAKVDVTVEKDLAANFNVTGYPTIKFFISGEPMEYTGGRQTSDIINWLKKKTGPPAKEVKTCEEAKTFIDSDEVIVMGFFKDQEGKGAAAFKKIAAEIDDVAFGITSEDNVFKEHKMKKDGVVLFKKFDEGRNDFSGDFEEAAMSKFIKDNYLPLINEFTQDTAQKLLSGDVKSYLMLFVKKEGAKDILDTFKAAAGEFKGKVLFIYLDTAIEENERVMEVFGLKAADTPAMCLIQLDEDLVKYKPESDSLDKSTITKFVQDFLDGKLKPHLKSQEVPEDWDAQPVKVLVSKNLKEVAMDKSKAVFVEFYAPWCGHCKELA…	*	0	>TRINITY_DN25097_c5_g1_i7_Frame_R3
OK053_401	PDI-A2	Protein Disulfide Isomerase (PDI-A2)	VKKEGAKDILDTFKAAAGEFKGKVLFIYLDTAIEKNKRFMEVFGLKAADTPAMRLIQLGEGLVKYKPESDSLDKSTITKFVQDFLDGKLKPDLKSEEVPENWDAQPVKVLVSKNFKEVAMDKSKAVFVEFYAPWCGHCKELAPIWDQLGEKFKDSKDVIIAKMDATANELEDLQIKSFPTLQYFPKGSDEIIEYDGERTLKELIKFVESGGKQEPPKKEEEEKEEDDDKKKDEL	*	0	>TRINITY_DN25097_c5_g1_i10_Frame_R1
OK053_403	PDI-A2	Protein Disulfide Isomerase (PDI-A2)	PAKEVKTCEEAKTFIDSDEVIVMGFFKDQESKGAAAFKKIAVKIKDVSFGITSEDRVFKEHKMKKDGVVLFKKFDEGRNDFSGDFEEAAMSKFIKDNRLPLINEFTQETARKLFTGDVQTHLMLFVKKEGAKDILDTFKAAAGEFKGKVLFIYLDTTKEENEHIMGFFGLKAADAPAMRLIQLGEGLVKYKPESDSLDKSTITKFVQDFLDGKLKPHLKSQEVPEDWDAQPVKVLVSKNLKEVAMDKSKAVFVEFYAPWCGHCKELAPIWDQLGEKFKDSKDIIIAKMDATANEQEEIKIKSYPTFKYFPKGSDEIIEYDGERTLKELIKFVESGGKQEPPKKEEEEKEEDDDKKKDEL	*	0	>TRINITY_DN25097_c5_g1_i12_Frame_R1
OK053_404	PDI-A3	Protein Disulfide Isomerase (PDI-A3)	MRRAVILFSCIVLAVQASDVLEFTDSNFESKIKELDVALVEFYAPWCGHCKRLAPEYEKAATKLKKSDPPVPLVKVDCTAEPKTCSEYGVSGYPTLKIFKGGEFAKDYQGSRESDGIIKTMEREAGPASKELEDFKQYEDFIGRDTVCVVGFFADADSKMAKTFSKLADTHEGEIRFGHSTASAVMDKAKYKDEIVLFRPKVMQNKFEDSAVKFTGDATKKSAIEEFLTQEQFGMCGIRTMKNAGDFSKPTFVVFYDVDYVKNPKGSNYWRNRVMKVGKKLRDEGLKVFFGVSNKEEHSHELGECGLQDAEGDKPIVCAYDEKNRKFKMEEEFSVDSFEKFVRGVLNGEVEAYLKSEPVPENNDQPVKVVVAKNFDELVNDPEKDVLIEFYAPWCGHCK…	*	0	>TRINITY_DN25157_c2_g5_i1_Frame_R1
OK053_396	PDI-A6	Protein Disulfide Isomerase (PDI-A6)	MKMTGTGLVLFSLAVAGVSALYSPSDDVVDLTPTNFHSKVINGDELWIVEFYAPWCGHCQSLAPEWKKAASALKGIVKVGAVNADDHNALGGQYGVRGFPTIKFFGLDKFKPQDYQGQRTAQGIVDFSINQAKSVASARLSGKKSGDSKSKSGGSGKAGDPADVVELTDSNFEKEVLEHDGLVMVEFYAPWCGHCKNLAPQWAKAASELKGKVKLCALDATVHTVMANRYGVRGYPTIKAFPAGKKDGEAEDYDGGRTASDIVQWAMEKAAANIPSPDVYEITSSEVLMDNCEGHQLCIISVLPQIYDCQSECRNNYISILKTLGEKFKKNQWGWLWAEAGAQPALEQSLEVGGFGYPALAAVNTRKMKFSLLRGQFSEKGINEFLRDLSYGKGSTSPL…	*	0	>TRINITY_DN24844_c1_g1_i2_Frame_R2
OK053_313	Proteasome subunit alpha type-4	Proteasome subunit alpha type-4	YGGWKATCIGNNSANAVSLLKQEYKEGETSLDEALSLAVKVLSKSLDLTKLTPDKVEMATLTRKDGKTVMTILPDNQVEAL	No	0	>TRINITY_DN22694_c0_g1_i1_Frame_F3
OK053_440	Transcription factor	Transcription factor	MPRHLISDAHEWINEIPTVPIYYLAKPQPRERAWRNQRGKKTLLSLTLVRLCEET	*	0	>TRINITY_DN24832_c7_g1_i4_Frame_R3

## Sheet: 2-Low_coverage_proteins
Supplementary Material Table 1: List of proteins from the venom gland transcriptome discarded for low coverage (<5 reads mapped)
Code	Sequence	Stop codon	Complete	Contig name
OK053_011	MGMRMMFTMFLVVVLPATVVS			>TRINITY_DN25124_c2_g4_i2_Frame_R2
OK053_039	ECCLSFCSHINGGNKNYWFWSM*	*		>TRINITY_DN23876_c1_g1_i18_Frame_R3
OK053_047	RFYFDMGSNKCKEFIYGGCLGNANNFLTYKECNDNCGPE*	*		>TRINITY_DN10131_c0_g1_i1_Frame_F3
OK053_050	CQTFLYTGCGGNSNNFPNLYACKECCEWDMTCYA*	*		>TRINITY_DN28179_c0_g1_i1_Frame_F1
OK053_055	HQWREQKLLVLVNVIMTCI*	*		>TRINITY_DN23876_c1_g1_i18_Frame_R2
OK053_059	VIRQSHDIYPTSAKGSRCLLPVPHFFFGLLPKQDKSCALSRLFLP*	*		>TRINITY_DN24911_c2_g1_i5_Frame_R2
OK053_060	NPASCCCCADVDPGRASRKTPKGEDQ			>TRINITY_DN24912_c6_g3_i2_Frame_R3
OK053_063	GGFIQQRQRLLISCIIAPTSLV*	*		>TRINITY_DN24994_c3_g2_i9_Frame_F3
OK053_064	MSSTPLCATPGLIFDSHVLFTGYKL*	*		>TRINITY_DN25060_c3_g2_i2_Frame_F1
OK053_068	LNLPRHWSNNYPTPHGTLLKDVFRKIEDSPTPCL*	*		>TRINITY_DN39527_c0_g1_i1_Frame_R1
OK053_073	MTMYMKTMFGGFVLVVLATTVVGLSVHGGKVPDSLIHCRLFEFRICLLTCWILD			>TRINITY_DN24433_c0_g1_i5_Frame_F2
OK053_085	MARFLSILLCIAMAVALAAGVYYPSSEEIGPCSTNDISKTEVYTEQDDEYVLDYSYCTCASGEVHFEAD			>TRINITY_DN13871_c1_g1_i1_Frame_R2
OK053_103	EADRDTDRDDGNPRRDDFMRIMCGDEFCTYDCCEIVDGSSKCKQPDCP*	*		>TRINITY_DN24534_c3_g1_i1_Frame_F2
OK053_108	MKLALTFLLILMILPLMTGMKKSGDHERRSVKSMRDVFRDHR			>TRINITY_DN6367_c0_g1_i1_Frame_R3
OK053_133	MSGHTSVNFLLLSIVALGMVATVICLCDSYISSELCEHPEETCFC			>TRINITY_DN25128_c1_g1_i7_Frame_R2
OK053_145	MQPSVMLVVLLMLTMPLINGVILKAASRRKAFVPYDRSNLDSHIGKRRCPAGCKSC			>TRINITY_DN46154_c0_g1_i1_Frame_R3
OK053_166	MISKLGAVLTICLLLFSLTAVPLD			>TRINITY_DN24842_c1_g1_i6_Frame_R3
OK053_179	ENKQLLNTDERREIILPALRVQSLIACGDNPDLCT*	*		>TRINITY_DN24994_c3_g3_i3_Frame_F3
OK053_182	ENKQLLNTDERREIILPALRVQSLLDCIGYAGSCE*	*		>TRINITY_DN24994_c3_g3_i7_Frame_F3
OK053_204	MKLTCMMIVAVLFLTAWTFVTSDDSRNVLD			>TRINITY_DN23949_c6_g1_i3_Frame_R3
OK053_238	LNKRCYDGGTSCNTGHQCRSGWCILDCL*	*		>TRINITY_DN25060_c3_g1_i1_Frame_F1
OK053_245	IVAVLFLTACQLITAEDSRGTQKHRTLRSTVRRSKSELTTRCRPSGSNCGNISICCGRCVNRRCT*	*		>TRINITY_DN39479_c0_g1_i1_Frame_F1
OK053_246	MKLTCALIITVLFLGITADDSRDKLGYSVLKSIAGMLNSGTLRTCR			>TRINITY_DN42146_c0_g1_i1_Frame_R3
OK053_250	RKRNCSDDWQYCESPSDCYSW			>TRINITY_DN23525_c8_g1_i7_Frame_F2
OK053_258	MWGDCKDGLTTCFAPSECCYEDCEGGCTMW*	*		>TRINITY_DN24372_c5_g3_i14_Frame_R3
OK053_277	WDGDCRTWDAPCNPGVECC			>TRINITY_DN24387_c0_g1_i4_Frame_F3
OK053_294	MEKLTILLLVAAILMSTQALVERAGGSR			>TRINITY_DN24954_c0_g1_i9_Frame_F1
OK053_302	MSGLGIMVLTLLLLVFMATSHQDAGVKRLMLRNKLQKRTCSSPSDCPTGQECCPDKVDEPEGFCVNECIITVYYTK*	*		>TRINITY_DN51454_c0_g1_i1_Frame_R3
OK053_312	GDRNPNKARSATTRLLQGPARRMDGRNCTPCGPGLCCIPGKSCETSTHHGTFGQPACV*	*		>TRINITY_DN16355_c0_g1_i1_Frame_F1
OK053_329	FNDNAKRILQILQDRSGCCVIDRNCCG*	*		>TRINITY_DN24051_c1_g6_i2_Frame_R2
OK053_356	TCSWNFEWSLTTRCHLQATVSLSFHLWNWM			>TRINITY_DN24892_c8_g1_i18_Frame_R2
OK053_362	MSTPRMMPLILLLLLSLAIRCGDGKAIQGDRDTTA			>TRINITY_DN15925_c0_g1_i1_Frame_F3
OK053_363	MSTPRMMLLIVLLLLPLEIPCGDGQAFQGDRRLRMSLLRRYKER			>TRINITY_DN15693_c0_g2_i1_Frame_R1
OK053_368	MKMLESALWILAALALPWIVAQDSSTAELCKINSNGCSVPFALIQCQKHFLAACD			>TRINITY_DN17431_c0_g1_i1_Frame_R1
OK053_370	MRVPFPALKTMVTVFLLLMGNTSPVHPVILSSSISLSTV			>TRINITY_DN6172_c0_g1_i1_Frame_R3
OK053_386	SQGITCECCFNQCTYYELLQYCN*	*		>TRINITY_DN41771_c0_g1_i1_Frame_R2
OK053_405	NLAPHWKQAATDLKGKVKVCAVDATKNTITAQKYKVEGFPRIISFMSGVRGEDYNGGHTASDIVEWALEKSGADLVSPE			>TRINITY_DN32937_c0_g1_i1_Frame_R3
OK053_423	TNGSQFFICTEKTNWLDGKHVVFGKVVEGLEIVSEMEKCGTQSGKTTKKLVIADCGQL*	*		>TRINITY_DN33127_c0_g1_i1_Frame_R2
OK053_425	GYKGCSFHRVIKDFMVQGGDFVNGDGTGLTSIYGGRPFADEKFTYKHYGPGILSMANSGKDTNG			>TRINITY_DN34804_c0_g1_i1_Frame_F1
OK053_428	MAQLQREDVTNPVVFFDISIGNTEVGRIKFELFANGPKGVPKTAENFRQFCTGE			>TRINITY_DN49398_c0_g1_i1_Frame_R2
OK053_444	MQPVQSVTRCCLLVLLLSAFCVSRLPLRARQPLPKQLNIERG			>TRINITY_DN23761_c4_g1_i1_Frame_R3

## Sheet: 3-Assembly_artifacts
Supplementary Material Table 1: List of proteins from the venom gland transcriptome discarded for being assembly artifacts
Code	Sequence	Stop codon	Complete	Contig name
OK053_012	MGMRMMFTMFLVVVLPTTVVSLTRRAGINDVCKSWRDCPQGADCYVDVGLRCRWPSDHSCTANNQCSVDSCINGICKANIGGRCLSNKDCPEGATCKSQGWLNFEKKCET			>TRINITY_DN25085_c2_g2_i3
OK053_013	MQLYTHLYLLVPLVTFYLILGTGTLGDGGALTERRSADVTALKPEPVLLQKSAARSTSDNGKDRLTRTKRIFIKRGNTARGYEEDREVAETVRELDEHGKR*	*		>TRINITY_DN23168_c0_g1_i1_Frame_R2
OK053_016	MQLYTHLYLLVPLVTFYLILGTGTLGDGGALTERRSADVTALKPEPVLLQKSAARSTSDNGKDRLTRTKRIFIKRGNTARGYENDRETAENIRELEVAGKRKRKRSIKLGVPRDTRQF*	*		>TRINITY_DN23168_c0_g1_i4_Frame_R2
OK053_024	MLRLILAAVLVSACLAYPQRRDGAPAETANLQGFGQGMMQPLPGMQEMQPLQGMPAGMPFNNPFNGMGYKRAADENLEERREHAKFQADKSAFDSESSPEDFMKFLEENGNTNPFEDASPDLGKFESDQTAKRKTSSASLTSNHKRQKRA*	*		>TRINITY_DN25017_c11_g1_i1_Frame_F2
OK053_030	MKLTVMFIVFLMLTMPMASAEITRRTVDEGEAGVLAGDRAANKMALLQERLCPPICNGCPGCY*	*		>TRINITY_DN23080_c0_g1_i2_Frame_F1
OK053_033	MMLFILAAVILTMASTTVNAEKCANDQKVCHMLLRGREREVCKCASTGVCTKDDDHKFTIGDLAFYTCKQVSHFDPCNEWQDPMGSDLQFKCRCKNDEYRIENDKIVCSKSSQSL*	*		>TRINITY_DN46483_c0_g1_i1_Frame_R2
OK053_034	MSKIGLVLVVLYLLSSPVNLQQNEDNKAFSKIRSPTQIREQPECDDCSANDGGHCVGTCCPGGVCEGGHLGCGCQYPGTTRG*	*		>TRINITY_DN10718_c0_g1_i1_Frame_R2
OK053_045	ETSGGRPVASRCTPLPWRTLWCWGGQGRPKSARRKGQSSWRSSQLKRCCRAALCTLGRTRYATSCPSGFCAPCRWHKPPISSSSTCSRFCGTFFVGF			>TRINITY_DN24796_c4_g6_i1_Frame_R3
OK053_049	MEGRGLAVVLILASCLSALTVGDKRSLPAVCLQPVVVGPCAASVQRYYFNHHLDICQPFVYGGCNGNGNRFITMAACVNTCKSPSVAIVVD*	*		>TRINITY_DN23459_c4_g1_i1_Frame_F1
OK053_051	LTTSKMIVLVSVPLAVHRTSFIETEGRLVSELLKNPRAKRQQCVSCGGKNYCTPKNCNGGQCSSGR*	*		>TRINITY_DN10730_c0_g1_i1_Frame_F2
OK053_053	LPTHTQKCTFCFCCILNTTCFTTCDSSQ*	*		>TRINITY_DN23522_c4_g7_i1_Frame_F1
OK053_061	NPASCCCCADVDPGPVSRKTHNEEDRFFIK			>TRINITY_DN24912_c6_g3_i6_Frame_R1
OK053_067	LERWDCKAKKKLLFFYKTSTALFHMVHMLLKLPWLLRSHRLQNFY*	*		>TRINITY_DN25130_c1_g1_i8_Frame_R2
OK053_069	MNPANPYNPMNPVNSWYNPMNFQYPFHPPMRVASYYLTPPLGSSYLFPSNGYGHFHLAPTQAAAPLNLHMHFPYSYQAGGMYNPYMYPYQSSALYQPYGYAAGVPGAMAWNQFRGAAWNPYFAMGYGSYPLWPSQFAHMWPM			>TRINITY_DN54250_c0_g1_i1_Frame_R2
OK053_070	MLKMGVVLFIFLVLFPLATLFPLATLQLDADAPQPVERYAENKQLLSPYERREIILHALGTRCCSWDVCDHPSCTCCSG			TRINITY_DN24479_c0_g1_i2_R3
OK053_071	FFSSGEWKKTTSPIELRGGGEGGGGTDLWIRKWLIKLMGARKVRQLGQAMREISPLLAQAFHACLFCCAAAVLLSSRKLASFVDGVAPSRLIHSSLFPCVRVDAKPFGCFKCHSVCSGHHRNAFLVTAHHRREPRPVVWHESYMICPKLRKHEDSVEARQACLVEHFCVWDFVLPFFFKQSCEAGRVEVIQLLGMPLVHCQRFTWVEGGGGLLCTTSASGEWDGAWLMTCTVMAIDEVVCKGISDRQLTFDGADGGIPGNKKWVRIKREREMLADVVCASLSLCLHGHTHRANTFTLTVQNQPVERYAENKQLLNPDERRGILLPALRKFCCDSNWCHISDCECCYGRRTSMALCWAVSSQQRQRLLISCIIAPTSLVERTLHSGSDFVFFSDNKQTSK…			TRINITY_DN24994_c3_g2_i11_F1
OK053_081	MKVVAVFLVVALAVAYGQFFCPDSENDPLNCIETKASDATCMKSNSDQTYSYVCGYCGKKKESCFGNKVPVSDYNCQTRKIVNNCGGSAL*	*		>TRINITY_DN24591_c2_g1_i2_Frame_R3
OK053_082	MKAVAVFLVVALAVAYGQFFCPDSENDPLNCVETMGTLATCMKSKSGKSYSYACGYCGKKKESCFGDKVPVTDYNCQTRKIANPCGGPAL*	*		>TRINITY_DN24591_c2_g1_i3_Frame_R2
OK053_091	LTEGWPRLIDSDCERGRNMHITCFKDQSCGLIVKRNGRLSCSLNCKCRRNESCLPSEEVDWDHRDMNSLSVLQNSHLPETLVLTTV*	*		>TRINITY_DN24091_c4_g1_i11_Frame_R1
OK053_092	MMMRVFIAMFFLLALVEAGWPRLYDKNCKKNILRTYCSNKICGEATKNTNGELQCTMYCRCANG			>TRINITY_DN41885_c0_g1_i1_Frame_F1
OK053_098	MRTSGKLLLLCLAVGLLLESQAHPNADAGDATRDVGSDRTSVELSKMLKRWQAEKGQRKASAPKDFYIFPPQSRSFY*	*		>TRINITY_DN24241_c3_g1_i2_Frame_F1
OK053_101	MRTSGKLLLLCLAVGLLLESQAHPNADAGDATRDVGSDRTSVELSKMLKRWQAEKGQRKASARDEEGGFYIFDPNRRSFY*	*		>TRINITY_DN24241_c3_g1_i5_Frame_F1
OK053_104	MNTAGRLLLLCLALSLVFESLGIPVADDVEADRDTDPDDGDPRGRNSWRSTDCNGVPCQFGCCVTINGNDECRELDC*	*		>TRINITY_DN24534_c3_g1_i2_Frame_F2
OK053_109	MKLCVTFLLILVILPSMTGEKSSKRTLYNAILRGNRGECSLREQGCSGHGDCCLEMCCYDHKCRMYFGRCSPC*	*		>TRINITY_DN25014_c0_g1_i1_Frame_F1
OK053_117	RGTCSDRGQECKHDSDCCGHLCCAGITCQFTYIPCK*	*		>TRINITY_DN25014_c0_g1_i11_Frame_F3
OK053_129	MKLFWAIVVILMLLPLRTGVETSDNHASRSATALRDRLLGPKESKCQNAQGNCRDDSDCCGWLCCTGQSSGCAVTTMNCKEQPVQ*	*		>TRINITY_DN9097_c0_g1_i2_Frame_F1
OK053_134	MASVQSVTCCCFLWLMLSVQLVTPSPPGTAHLPRDGSDRDIPNVFVGILCYAFCTGGIELDDCDCSQILDLVSQISRKRSMAM*	*		>TRINITY_DN25054_c3_g1_i1_Frame_F1
OK053_136	MASVQSVTCFCCLLWLMISVQLVTSGLTGTARLSKHLTARIPSEANMEILCPEWCNEGYDGYGCTCTKRQDVVSSPIRRRKRSMRV			>TRINITY_DN25054_c3_g1_i8_Frame_F1
OK053_137	MTSVQSVTCCCFLWLMLSVQLVTPSSPGTAHLPRDGSDRDMPNVFVSILCYAFCTGGIEIDDCDCSQISDLFSQISRKRSMAM*	*		>TRINITY_DN25054_c3_g1_i9_Frame_F2
OK053_146	VMLFTFLVLFPLATLQLDADQPADRDAENKQDLNPDGRRGIILSALRSPNSCVWSPPCHLPSERMTAFTANNAALELPYSGLVAPEQ*	*		>TRINITY_DN24380_c0_g4_i1_Frame_F2
OK053_147	LQLDADQPVERDAENKQDNPDERKGLVSLALRRPCCSLRWCSNYCRCGI*	*		>TRINITY_DN24479_c0_g1_i1_Frame_R1
OK053_148	MLKMGVVLFIFLVLFPLATLFPLATLQLDADAPQPVERYAENKQLLSPYERREIILHALGTRCCSWDVCDHPSCTCCSG*	*		>TRINITY_DN24479_c0_g1_i2_Frame_R3
OK053_149	MMLKMGVVLFVFLVLFPLATLQLDADQPVERYAKNKQLFNPHKRRGIILRAPGKRCCHWNWCDHLCSCCGS*	*		>TRINITY_DN24479_c0_g1_i3_Frame_R1
OK053_152	QLDADQPVKRYAKNKQDLNADKRMRLILPALRQRQCCAWEWCDHVCGCCE*	*		>TRINITY_DN24479_c0_g1_i8_Frame_R1
OK053_156	MMLKMGVVLFVFLVLFPLATLQLNADQHVKRYAENKQDLNPDERKGLVSLDLRLPCCYIEWCSRRCLCNPLEP*	*		>TRINITY_DN24479_c0_g1_i12_Frame_R3
OK053_157	MMLKMGVVLFVFLVLFPLATLQLNADQHVKRYAENKQDLNPDERKGLVSLDLRLPCCDVGWCSRRCNCDVYRP*	*		>TRINITY_DN24479_c0_g1_i14_Frame_R3
OK053_158	MMLKMGVVLFIFLVLFPLATLFPLATLQLDADAPQPVERYVENKENLNPDERREIILHALGTRCCSWDVCDHPSCTCC			>TRINITY_DN24479_c0_g1_i15_Frame_R2
OK053_159	MMLKMGVVLFVFLVLFPLATLQLNADRPVERYAANKQDLNPDEKREMILHVLGQRVCCWSEMCHARCKCCG*	*		>TRINITY_DN24479_c0_g1_i16_Frame_R3
OK053_161	LFPLATLQLDADAPQPVERYAENKQLLSPDERREIILHALGTRCCSWDVCDHPSCTCCG*	*		>TRINITY_DN24479_c0_g1_i18_Frame_R3
OK053_165	MMSKLGVLLIICLLLFPLTAVPLDGDQPADRPAERMQDDISSEHHPMFDAIRGCCPPLACSMGCDPCCG*	*		>TRINITY_DN24842_c1_g1_i1_Frame_R3
OK053_167	DGDQPADRPAERMQDDISFEQHPMFDATRRCCNAGFCRFGCTPCCWMTSFVIAASSSV*	*		>TRINITY_DN24842_c1_g1_i7_Frame_R2
OK053_168	MMSKLGENLVDHLSTSISPYLTICLLLFSLNAVPLDGDQPADRPAERMQDDISSEHHRFFDPVKRCCRLACGLGCH			>TRINITY_DN24842_c1_g1_i9_Frame_R2
OK053_170	MMSKLGENLVDHLSTSISPYLTICLLLFSLNAVPLDGDQPADRPAERMQDDISSERHPMFDAVRDCCPLPACPFGCNPCCG*	*		>TRINITY_DN24842_c1_g1_i12_Frame_R2
OK053_171	MMSKLGVLLIICLLLFPLTAVPLDGDQHADQPAERLQDDISSMFNSIRRREQNQFKSFTSVKLLDSRGERCCGPTACMAGCRPCCG*	*		>TRINITY_DN24842_c1_g1_i13_Frame_R1
OK053_177	MMLKMRAVLFTFLVLFPLATFQLDADQPVERNAENKQDLNPDKRREIILPALRLQARRSCSFPSNTWCK*	*		>TRINITY_DN24994_c3_g3_i1_Frame_F2
OK053_180	MMLKMRAVLFTFLVLFPLATFQLDADQPVERYAENKQLLNPDE			>TRINITY_DN24994_c3_g3_i4_Frame_F1
OK053_181	LKMGVVMLFTFLVLFPLATFQLDADQPVERNAENKQDLNPDKRREIILPALRLQARRSCSFPSNTWCK*	*		>TRINITY_DN24994_c3_g3_i6_Frame_F3
OK053_184	VLFIFLVLFPLATLQLDADHPVERYAGNKLDLNPDERREIILPALGHGRSSRCSGWRTC*	*		>TRINITY_DN48186_c0_g1_i1_Frame_F3
OK053_186	LEKRCRSGKTCPRVGPDECCERSDCFCKMVPARPYWRNKCICL*	*		>TRINITY_DN23761_c2_g1_i4_Frame_R2
OK053_197	MKMTYILIVAVLFLTAWTFVTADDSGNGLENLFSKAHHEMKNPEASKLNKRCIEYLEPCDMIRHTCCLGGCLLIVCI*	*		>TRINITY_DN23710_c2_g1_i5_Frame_F1
OK053_199	TCMMIIAVLFLTAWTFATADDSGNGLENLFSKAHHEMKNPEASKLNKRCIEYLEPCDMIRHTCCLGGCLLIVCI*	*		>TRINITY_DN23710_c2_g1_i9_Frame_F3
OK053_219	MKLTCMMIVAVLFLTAWTLVMADDSNNGLANHFSKSRDEMEDPEAAKLEKKECQEKWDYCPIPFFGSRYCCYGLFCTLFFCA*	*		>TRINITY_DN24303_c0_g3_i7_Frame_F2
OK053_220	MKLTCVVIVAVLFLTACQLATADISGGMRKHRALRSTTKLSRSPFDCSSPGAFCGLVPCCDSCNVLGRCGSGLHV*	*		>TRINITY_DN24428_c3_g1_i1_Frame_F2
OK053_221	MKLTCVVIVAVLFLTACQLATADISGGMRKHRALRSTTRLTPFPVECNRPYRGCGPFHLCC	*		>TRINITY_DN24428_c3_g1_i2_Frame_F2
OK053_224	MKLTCVVIVAVLFLTACQLITADDSRSTQKHRALKSDTKLSMLTLRCASY			>TRINITY_DN24428_c3_g3_i1_Frame_F2
OK053_232	LTCMMIVAVLFLTAWTFVTAITRNGLENLFPKAHHEMKNPKDSKLNKRCLDAGEMCDLFNSKCCSGWCIILFCA*	*		>TRINITY_DN24728_c1_g1_i2_Frame_R1
OK053_233	LTCMMIVAVLFLTAWTFATADDSGNGLENLFLKAHHEMNPEASKLNERCLDAGEIC			>TRINITY_DN24728_c1_g1_i3_Frame_R1
OK053_234	LTCMMIVAVLFLTAWTFATADDSGNGLENLFLKAHHEMKNPKDSKLNKRCLDAGEMCDLFNSKCCSGWCIILVCA*	*		>TRINITY_DN24728_c1_g1_i4_Frame_R1
OK053_235	LTCMMIVAVLFLTAWTFVTADDSSNGMENLFPKAGHEMENLEDSKRVKPCRKEGQLCDPIFQNCCRGWNCVFVCI*	*		>TRINITY_DN24728_c1_g1_i6_Frame_R1
OK053_236	LTCMMIVAVLFLTAWTFATADDSGNGLENLFLKAHHEMKNPKDSKLNKRCLDGGEICGILFPSCCSGWCIVLVCA*	*		>TRINITY_DN24728_c1_g1_i7_Frame_R1
OK053_237	ADDPRNGLENLFLKAHHEMKNPKDSKLNKRCIDGGEICDIFFPNCCSGWCIILVCA*	*		>TRINITY_DN24728_c1_g1_i8_Frame_R1
OK053_240	MKFTCILIVAVLFLTAWTFVMADDPRDGPDTAVRGGKRFWKARNEMNSAASKLNKRECLEADYYCVLPFVGNGMCCSGICVFVCIAQKY*	*		>TRINITY_DN25060_c3_g4_i1_Frame_F1
OK053_243	GLGNLFSNAHHEMKNPEASKLNKTWCKQSGETCNLLDQNCCEGY			>TRINITY_DN25152_c0_g5_i1_Frame_R1
OK053_244	DPRDGPDTVVRGGKLFSKARDEMNPAASKLNERDCLEPDYVCGIPFVFNGLCCSGICVFICIAQKY*	*		>TRINITY_DN29263_c0_g1_i1_Frame_R2
OK053_247	RLRDIMRRPKDYGARAHLPCKQLNESCPSHRECCPGLQCCGYKGGSCMINDPGC*	*		>TRINITY_DN43272_c0_g1_i1_Frame_F3
OK053_248	DGLENLCSKAHHEMKNPEASKYRHGLNPFSLLHPLVWGIVPGTALAADSRTADP			TRINITY_DN24689_c3_g2_i1|m.135945
OK053_254	MQKLIILLLVAAVLMSTQAVLQEKRPKEINFLSRRKTDAEKQQKRYCSDAWKYCESPTDCCSWSCDVVCSG*	*		>TRINITY_DN24372_c5_g3_i5_Frame_R2
OK053_255	ILLLVAAVLMSTQALPQGGGENRPRENIRFLSKRKTNAERWREGSCTSWLATCTHDQQCCTDVCYKRDYCALWDDR*	*		>TRINITY_DN24372_c5_g3_i6_Frame_R2
OK053_259	ILLLVAAVLMSTQALIQSGAEKRPWENIRFLSKRKTNAERWREGSCTSWLATCTHDQQCCTDVCYKRDYCALWDDR*	*		>TRINITY_DN24372_c5_g3_i15_Frame_R2
OK053_262	MGKLTILFLVAAALLSTQIMVQGDGDQPADRDAVPRDDKPGGTSGKFMNVLRRSGCPFDPWCG*	*		>TRINITY_DN24380_c0_g1_i1_Frame_F1
OK053_265	MGKLTILVLVAAALLSTQIMVQGDGDQPADRDAVPRDDKPGGTSGKFMNVLRRSGCPWDSWCG*	*		>TRINITY_DN24380_c0_g1_i4_Frame_F1
OK053_266	MGKLTILVLVAAALLSTQIMVQGDGDQPADRDAVPRDDNPGGPSEKFMNVLSGRECPWQRWCR*	*		>TRINITY_DN24380_c0_g1_i6_Frame_F1
OK053_270	MGKLTILFLVAAALLSTQVMAQGDGDQPADRDAVPRDNKPGGTSGQFMTFLRQVRCRMTPLCR*	*		>TRINITY_DN24380_c0_g1_i17_Frame_F1
OK053_276	MEKLTILLLVAALLLSIQAVNQEKHQRAKINLLSKRKPPAERWWRWGGCMAWFGRCTKDSECCSNSCDITRCELMRFPPDW*	*		>TRINITY_DN24386_c7_g1_i11_Frame_R2
OK053_280	MEKPTILLLVAAVLMSTQALIQEQRQKAKINLFSKRKPSAERRPGDRNCSHYGESCTVDADCCFNSCDETYGYCWPSF*	*		>TRINITY_DN24387_c1_g1_i7_Frame_F2
OK053_303	MTLSLARSAVLMLVLLLAFDSFVDVQPRGITRGARSRSGLLSKWYRNAGCSGDVCVSSADCSTCECQFRRCQIWTMDQGSPPS*	*		>TRINITY_DN23880_c10_g1_i1_Frame_F2
OK053_316	MRCLPVVVFLLLLLSAAAAPGVGSKTERLPGLTSSGDSDESLPFLNTICCWSGACCGG*	*		>TRINITY_DN21009_c0_g1_i2_Frame_F2
OK053_320	MCCLPVFVILLLLIASAPSVDAQPKTKDDVPLASYHDNAERTLQRLWNQRHCCPIDLPCCPLG*	*		>TRINITY_DN24051_c1_g1_i2_Frame_R3
OK053_321	MRCLPVFVILLLLIASAPSVDAQPKTKDDVPLAPLHDNAKSALQHLNQRCCHTYQWCCVDGN*	*		>TRINITY_DN24051_c1_g1_i3_Frame_R3
OK053_323	MRCLPVFVILLLLIAFTPSVDARPKTKDDMPLASFNDNAKRTLQILWNKRYCCLHDGSCCGIGK*	*		>TRINITY_DN24051_c1_g1_i5_Frame_R3
OK053_324	MRCLPVFVILLLLIASIASDTVQLKTKHDMPLASFHGNAKRILQMLSYKPYCCLHNNWCCDLG*	*		>TRINITY_DN24051_c1_g1_i6_Frame_R3
OK053_326	LLIASTPSIDARPKTKDDMPLASFHGNARRTKKMLSNKRFCCFPEHWCCEW*	*		>TRINITY_DN24051_c1_g1_i8_Frame_R1
OK053_337	MHYLPVFVILLLLTASGPSVDAGLKTKDDVPLSSFRDNAKSTLRRLQYKQACCGFKMCVPCG*	*		>TRINITY_DN24656_c2_g2_i3_Frame_F3
OK053_343	MRCLPVFIILLLLIPSAPSVDAQPMTEDDVPLASFHEQTLQELWNKRPCCPLIPGCCR*	*		>TRINITY_DN24656_c2_g3_i1_Frame_F3
OK053_344	MRCLPVLIILLLLTPSAPSVDAQTKTKNFMTLASLRDFAKKSPKRLTQQLECCTDVSYAVAD*	*		>TRINITY_DN24892_c8_g1_i1_Frame_R2
OK053_345	KGKCACRLWMRPLQAVLGCEIWKADCSFRTCSLTTRLHLQATISLSFHLSN*	*		>TRINITY_DN24892_c8_g1_i2_Frame_R3
OK053_346	MRCLPVLIILLLLTPSAPSIDAQPKTKYDVSLASLHDNAKRTLQKHWNKRVCCSRPTTWKIVCCYP*	*		>TRINITY_DN24892_c8_g1_i3_Frame_R2
OK053_353	MRCLPVFVILLLLIASTPSDTVPLKTKDDMPQASFHGNARRTLQMLSKKNYCCILDYFCCPML*	*		>TRINITY_DN24892_c8_g1_i14_Frame_R1
OK053_360	MRCLPVFVILLLLIASTPSVDARAKTRDDMSLASFHDDAKRILQILSMKRCCSIHDNSCCKLLDEQLKTCICVCL*	*		>TRINITY_DN25117_c1_g1_i1_Frame_R2
OK053_371	MRVPFPALKTMVTVFLLLMGNMSPVVPRSSTPLHKVKVLAYKVVTPGNSLNGVTLQDLAATNYKVTCVIQVENWTRYPLIAPRLRIANDGA			>TRINITY_DN6172_c0_g1_i2_Frame_R3
OK053_374	MPMGQLTLVLYLLMLLLLTPEGSKRDVEDRRSTEQCWYCSFGKCVWPIICCGDDGCEMGTAEANSCRPEGDQRFPCRVIGKSCIMNNPSNPDDHVGNCIGGDGLGICCVDDNTC			>TRINITY_DN31588_c0_g1_i1_Frame_R1
OK053_392	KLKPDLKSEEVPENWDAQPVKVLVSKNFKEVAMDKSKAVFVEFYAPWCGQCKKLAPIWDQLGEKFKDSKDVIIAKMDATAHELEDLQFKSFPTLQYF			>TRINITY_DN23366_c0_g2_i2_Frame_R2
OK053_398	DTFKAAAGEFKGKVLFIYLDTTKEENEHIMGFFGLKAADAPAMRLIQLGEGLVKYKPESDSLDKSTITKFVQDFLDGKLKPDLKSEEVPENWDAQPVKVLVSKNFKEVAMDKSKAVFVEFYAPWCGHCKELAPIWDQLGEKFKDSKDVIIAKMDSTANDVEEVPIKSFPTLKYFPKGSDEIIEYDGERTLKGLIKFVESGGKQEPPKREEKEKEEDGDKKKDEL*	*		>TRINITY_DN25097_c5_g1_i5_Frame_R3
OK053_412	HVVFGSVVDGMDVVKAVEAVGSQSGKTSKKVVIANCGQL*	*		>TRINITY_DN24385_c2_g1_i1_Frame_F1
OK053_435	NALYYNHTAVTLVNKFTRNMHRLYAASPRRLERPGPEGPINNWVYRSTGGKIRDFLNPGDITEDMVILLLNAVYFQGTWRNIFDERATYQQDFTTASGRSVRVPMM			>TRINITY_DN23897_c0_g3_i1_Frame_R3
OK053_437	MTAIPVLLLSLTTLLLALQGLLEIGDIGRGHSLVPECGHPVVQPASHLSRRIVGGHEALRGSWPWTVSLFELDMPACGGAIISDRVILTVAHCFEYPVSRNASRWTVRAGEHSLLETDPGEMSFHVEKIVLHEHYSHTMLENDIALMVVSDSILFTTLIRPICVPHYPPHAALPPGTACMIAGWGDTKGTGPRGVLMEVLLPVISDDVCSLPNWYYNHFIPQKTFCAGYEEGLKDACAGDSGGPLMSKLDDRWYVSGIASWGFGCGERRWPGVFTNVTYYVPWIHTQLTAVGLPGLFEDSIVG*	*		>TRINITY_DN24787_c0_g1_i3_Frame_F1
