# Supplementary material for: A Combined Transcriptomics and Proteomics Approach Reveals the Differences in the Predatory and Defensive Venoms of the Molluscivorous Cone Snail Cylinder ammiralis (Caenogastropoda: Conidae)
Source: Toxins (Basel). 2021 Sep 10;13(9):642. doi: 10.3390/toxins13090642 (PMC8472973; doi:10.3390/toxins13090642)
Supplement: Supplementary file 1 [file toxins-13-00642-s001.zip › Sup. Mat. Table 2 - shared and uniques peptides.xlsx]

## Sheet: 1-Detailed_venom_composition
Supplementary Material Table 2: List of all the proteins found in the venom of Cylinder ammiralis
Predatory	Defensive	Transcriptome	Identification	Sequence
P_001			NA	GRVIGRQEIVMDLQRTLRVLALVVLATSVALSAQRHEHHMPRVAHPVHRGVCPGGSLMRCLDDCLATVSKLSPIELADLCANHACNDC
P_002	D_003		Thioredoxin-like	INLIDLAFFFKRLDWPRVMYKGRDVEETHPCEVGTKVGCVIVLHSPSAKGEADKIIDSLQFDIHGMVGLIVEHVDDGPGGSKVLDIVLLKQDGDTVTLNGSLELDQIEGEITSHLLPASQTKTGYHDEDYDFEPTNIDDMVVHMAYLEREHLADVPLLPALTDKTFPATTKDNKLAMVLFYLPFDAEGMLFLKIFEDAGKKIAAMKGDDPKAHPLARVNCFDWTDVCRKESVTTYPALYIYRKGVKRDLYRLNLDVDIIVRTVMLLQAEQPLMLTSEKEVNDFLSGQLPTEAYKDIDNLVLLKLSKSRKETEMYIDVVKALEAQMLFAVVAPDVTDLVPNGGVLHKRPKDPIQPMETLTAPRDAATIIEFLLKRQFALFPELTFMNFPTLYARKQPFAI…
P_003	D_004		Choline transporter-like protein 2	MGKADDAASLESTDERKPLKDYDPSHNGPIKKRSCTDIICCIIFFIFIVGLVAVAVFGFVWGDPRLLLYPMDSEGNLCGYGDYKGKDKLFFFDLIQCAKLGPGIFVQGCPTPQVCVSECPSENYVWVESLNAGSGDGDKSNLICKDGVKLGQKTLTELVTDNDCAAYYLKSTSLINRCVPLDNLFDGVKGVVSVNSSVVVDNYNNNVTSEDISTASESVVIDPSCQSLGC
P_004			NA	MAVFFTSYVLFLTWCGFSSGLVSARSVGLQWAGRGGEDDVDMTQVAALYDVQCDLPGCEYDLQPFCLENGVIVMGSCSLKRTFCQNGHRNSLQLATSWNSCFQPSNVIIISGQPQTDAGERLESGPTAAEEGREAGNTHASVSDITRDLVNQQLEEELLTDPGRKPEVKVRVGSSAKDTEVKGDGDNGEGDQR
P_005	D_007		Immunoglobulin-like domain	KFSCSVEKTVGGESDQSDPFSPAVRPKRPVVNPAIVDVTDGKGISFTCNTQYTAKDHVNFRWFRNGTLIPNSENQIYSLSSSLKDNDHVFSCKVETAPGGTSDESNAVKPKVKPRTPSVIPVVTTVVEDDSITYTCNTSYMPDVHVNYEWFQSGLIIPGAKGQKYTFTSSLKDNTNFSC
P_006	D_009		von Willebrand factor A-like (glycoprotein )	MSGIIALAVAAASVLGLCLFFTVCEAVGSEFSLPECDNQYDVVILLDRSDSVGEENFIKMLDFAKTLSTFVVQDKDHIQIGVDTFADSFNTDITLRQGADKAAFQSSIQDIIFTGGGSRNTHDALMNVTFASFTPAAGHR
P_007			NA	VTAAACPASAPLTCACPADTTASSDKTECTCDAANKVLKGDKTCGLKVDETGCGGDGECLDDATCSSGTCVCSANYVASSDKTKCLLKAGQTGCDTKDCLDNADCSSNTCQCSANFVPNADNTKCLKAAEQPCSDAAECLTSATCEGDPKTCTCPYGANDAKSKCRVKIGEACTASSTDECVVTAADCPASGTLECACPADTTANTEKTVCACTDNKKTLKADKTCGLKVDETGCGGDGECLDDATCSTEKCVCKTNFVASSDKTKCLKKADQPCNDATECLTGAICEGNPKICTCPKGANDDKTKCSGASAVMASLTLLLAALVVSLRM
P_008			NA	VTAADCPASAPLTCACPADTTANSDKTECMCDDAKKVLKGDKTCGLKVGETGCSGDGDCLDDATCSGSGACVCSANYVASGDNTKCLLKAGQTGCDTKDCLDNADCSSNTCQCSANFVANSDNTKCLKAAEQPCSDAAECLTSATCEGDPKTCTCPYGANDAKSKCRVKIGEACTASSTDECVVTAADCPASGTLECACPADTTANTEKTVCACTDNKKTLKADKTCGLKVDETGCGGDGECLDDATCSTEKCVCKTNFVASSDKTKCLKKADQPCNDATECLTGAICEGNPKICTCPKGANDDKTKCSGASAVMASLTLLLAALVVSLRM
P_009	D_010		Alkaline-Phosphatase-like	MAFWSIPAFVQSVILLLGTFPTGQTTSVDKPNIVFVVVDDAGWADFETNDPSMSTGNITALKEDGVFLNQSYVYSMCTPSRAAFMTGRYPHTFGLQDNTVNSKMLNWINENFTFLPRELQHQGYTTHMLGKWHLGFCHPGLTPLGRGFDTFYGFWLGAHESYYNHTTSKGATYDWRDNNVSDPSAKGLYQTELLNERAVKIIQDYDGSKPFFMYLSYGAVHGPFEVPDYYMDTYCPHITNQSRQIHCGMMAVVDVGVGALVAALKAKGLYENSVIVLLSDNGGPIKGGSVNYPLRAGKKNLYEGGIRSYTIVRGPGVQGNRTWSGLAFAVDWFPTFVSIAGGGPLNYTHGYDLYEAIKEDEDSPREDFIIVSDFHKFNHTMLRQKHWKLLTAVPGLSPT…
P_010	D_011		Neuropeptide F	MQKAQLSALLVISLVVAQMTCVHSLRRPQRPARFTSAAQLRRYLRALNQYYAIVGRPRFGRNVDSNKKSVKDLGDLKPNGESIPPP
P_011	D_012	OK053_031	Cerm_08	MMLFMFAAIIFTMASSTVNAHICEQNEDLCATLIDGVTTEICDCPNGACPRGNDYKITVGSVSLYTCQQISAFDDCTRGQHLVDDDFTQIYCKCSNGMYTVGGSQGIVCV
P_012	D_013	OK053_390	Neuropeptide F	MQKAQLSALLVISLVVAQMTCVHSLRRPQRPARFTSAAQLRRYLRALNQYYAIVGRPRFGRNVDSNKKSVKDLGDLKPNE
P_013	D_014		Metallopeptidase	EGRRLTPSSAGGLISVLTYSKMGCCERFHFQHVGCLLVLWVALAAATGYVNSLGDDINNALDETIDPCFDFYNYSCREWMRHHDIPVEEDNYDRFEEVKQEIANRLKGLLETPYNSVTERSYVRKAKGLYRACMNEEQLARLGAKPAQDLVKGLKFWPSTQGVPLYLEPALAEVNELFEIEKTPILNAYVYADRLNNSNNIVRIDEGDTFIRRRDIPRDGQWSQRLRRRKRQLTALVSATLSPGDWQGDISKLMEFDIKLANLTLSNKERRSNRHYRKWKLHELHREMPWFNWIAYLQPLFDAAGQPLSTNTEVAVQAAVSVDAMIKLCRETDSKIIADYLMVQVLKHFERYLSKDMREAFRQDKDRSMMCIEDITELMGAAIGKMYSDNYFASEDKRT…
P_014	D_015		Glutamatinyl cyclase	MMKKVTTCVVRLLLLCSAVACIRAQQSLGCGSLTSQYTVDNLSNLTVGMSNDGLRMEALPPVLKPRVSGTPGNVDVRNSIITWMTQQGWSVGEDRFTANTPYGPVQFSNVIATLNPGAPRRVVLACHYDSKFLMFGARPFVGATDSAVPCALLMDSAKKLRQAFQEKGADASFQRRTLQFIFFDGEEAFVRWSRTDSLYGSRHLAQKWASTPDPAAAGLNYLQTIEVFILLDLIGSADTQFANLFIRTAGVYRKLQNIEMCLMENGYLDATANSLPLFTSVQRRGITQDDHLPFLNEGVPVVHLISTPFPSVWHQLSDNLNALDFQRIENLARILRLLLVDLL
P_015	D_016		von Willebrand factor A-like (glycoprotein )	GFQACSQYRVWSMYFCPKYCGHCVNVSIEAGFFGKCLYKGKTYQQSEIWEDGCSYQCECTDAAAGRYECYNLCYLYYNLHPLCTLVRLEGECCLQPVCNFEATYLTTVGYGAGYLYGSKVCYYNNTKYHQGQTWFVDCDLQCVCQDAETGLYTCQSLCAQYTSLPSGCKLIKEEAECCAKPVCTYFTVRGTFNGTGHPSGQEISCGTNDGCLYNDKKYKQGEQWNDGCERRCVCENATYGYYRCDNRCPLYKNLPSDCVLVPVEGQCCRAVVCNCGTVISAQTVPGVIGDLPCNTSTNGGSATPGQTNHVYVVGVTSPSLLTMVGRIHPHPHPYYPVLTPSVIPYNGTQAYSFPLPSGDTYGYPAAPDYVSSPYRTMNRREANNRPKRAAPPTLPWYQT…
P_016	D_018		Conoporin	MALSQKALLVLVLSMLLTASDSWARRINCKVFVYAPICRGVAAKRGGDSLSVGGSAELDDTLTDPFLKSEEPKEWRELTRLSRVLQTFLSHPTGEMEQHD
P_017	D_019		Angiotensin-converting enzyme-like	LPFGYLIDQWRWSVFSGDTPPDQYNDYWWKLRCKYQGISSPIPRNSTDFDPGAKYHVPANTPYIRYFVAHVLQFQFYKALCDAAGHNGSLHTCDFYRSQKAGQLLGNMLQLGSSKPWPEALEQITGTRHMDVGPLLEYFKPLQDWLEEQNAGQSIGWSEECPREELITAAQWLRGYDQRLEKVKAESTFADWNYESNITDETSAVSVQGRVKLGTFQKEEAKKVEQFQWRNLSDVTIRRQFQLLTNIGPSAMEDPADYEKMQSIQSKMDGIYGAGKVCLNSSTDCVGLEPDLEDIMATSRDYDLLLKVWEGWRNVTGRKMKSQYEQFAALSNKGVQPLGYADTGEYWRSFYESPTFQKDLETLLDQLSPLYEQLHAYVRRKLMEVYGEDKFPETGHIPA…
P_018	D_020		Carboxypeptidase D-like	ATKMAIKEGRGTASLNMLPVICVTFLFLACPVTGRPNPRTSRSINTTDYIHYDEMESILRNLTREFPTLAKLHNIGSSVENRTLWAIQITDKVNETEPGEPMFKYVGNMHGNEAVGRQILIYLAQYLLQEYGRDARVTRIVDSTNIYIMPSMNPDGFEKSNAGDCGGLTGRHNAHNEDLNRNFPDQFRPESENHLIQPETSTLISWIEKEPFVLSANLHGGSVVASYPFDDSQTHQRQGVNSATPDDAVFRLLAKTYADNHLEMHKGNVCPEDNFTGGITNGAHWYDVPGGMEDYNYLHSNCFEITLELSCCKYPPASQLTQEWKNNKEALLSYMEKVHIGVHGFVTDKATGQGVTNATISVVGINHNVTSFQFGDYWRLLVPGKYTVVVSAPGYAEVR…
P_019	D_023	OK053_193	O1	TCMMIIAVLFLTAWTFATADDSGNGLENLFSKAHHEMKNPKASKLNKRCTQSGELCDVIDPDCCNKFCIIFFCI
P_020		OK053_200	O1	TCMMIIAVLFLTAWTFATADDSGNGLENLFSKAHHEMKNPEASKLNKRCVDQFDPCDMIRHTCCVGVCFLMACI
P_021		OK053_196	O1	MKMTYILIVAVLFLTAWTFVTADDSGNGLENLFSKAHHEMKNPEASKLNKRCVDQFDPCDMIRHTCCVGVCFLMACI
P_022			Coagulation factor	MMLLLSVTLTLLVIASTNADSPPGVPPHQQQRQQQFDQQQMNVQEGHGHAGSKLKFQSEIHNADHIIEHLQDVIKTKPKDQMSEEELEFHYFKMHDYDNNNKLDGVEIGKALTHFHDDDHDANKPETGDSSSSSTSPPADNQKSTQGSSSHSGGNDPDRVSGGEDVEIVTDEKLAELVDSILELLDWDNDGYVEYFELKVAQFKSKDKE
P_023	D_025	OK053_189	N	MMSTLKMLLLTLLLLLPLATFDSDGQAIPGSGIPGAVSSRVRRLLGGDEKSGRSLEKRCSSGKTCGNVGPVVCCPRSDCYCSVVNNGNFRKPVCVCP
P_024	D_026		von Willebrand factor A-like (glycoprotein )	MSALPHVLAVSVLSVCLLHSVPGAVAVDPATSKCSTKPADVVFLLDSSGSVRAFNFDKVREFLKQFVQSVEIGPTNFRIGVATFASHVTNIFWLNTHSTKTSLLDAIHDIPYRGGGTRTYLGLAYARKEAFTKAHGDRDDANNILVVITDGVSTNAKLTAEEASEVHKSDTKVIAVGVGYAVKNELKTIASDEDSVFSVTNFDDLKSVEEKLKTTTCEAAIAPVHDCGILSGDIVFLLDSSGSIGPGNFRKVKDYVKHMAKSFMIGPKAVNIGVVTFDMKVHDEFWLRNYTTEVSLLQAIDRIPFYDGTTKLDAALSYARQHSFSKTHGDRDDPANVLIVMTDGQSDNPTNTQREAQELHKSDVTVLGIGVGKYVDESELGIIANGKENVFDVTDFSAL…
P_025	D_027		von Willebrand factor A-like (glycoprotein )	MSALPHVLAVSVLSVCLLHSVPGAVAVDPATSKCSTKPADVVFLLDSSGSVRAFNFDKVREFLKQFVQSVEIGPTNFRIGVATFASHVTNIFWLNTHSTKTSLLDAIHDIPYRGGGTRTYLGLAYARKEAFTKAHGDRDDANNILVVITDGVSTNAKLTAEEASEVHKSDTKVIAVGVGYAVKNELKTIASDEDSVFSVTNFDDLKSVEEKLKTTTCEAAIAPVHDCGILSGDIVFLLDSSGSIGPGNFRKVKDYVKHMAKSFMIGPKAVNIGVVTFDMKVHDEFWLRNYTTEVSLLQAIDRIPFYDGTTKLDAALSYARQHSFSKTHGDRDDPANVLIVMTDGQSDNPTNTQREAQELHKSDVTVLGIGVGKYVDESELGIIANGKENVFDVTDFSAL…
P_026	D_028	OK053_202	O1	MKVSSVLIVAMLTLTAGQLVSASSHYSKEVQIPSSVRSADEVDNSENLSKRKCVEQGKICGLILFSTSCCGKLCLFGFCIL
P_027	D_029		Neuroendocrine convertase	MVKKYVVVTVVVIAAALLLRVDPADGKEDESRYLNEWAVEIEGGLNHARSVAERHGFELLGQMPFLDNHFIVRHVDVPMRSKRSADQHTTRLTEDSEVKWAEQQVVRARSKRGYADNSPPLLLPMAPEETKTCEANTRLRYNDPDYPCQWYMVGDDEHEYTSNVIKVWKQKITGRGVVVCVVDDGLEHNHTDLFPNYDPYASWDLNSNDSDPMPHYNEMETNRHGTRCAGEISMAADNGKCGVGIAFNSKIGGIRLLDGNVTDRLEADALSFNHTHIDIYSLSWGPTDDGKTVEKPLRLVQTAMETAIQKGRGGKGVIYTLASGNGGGSNDDCNCDGYASSLYTISVSSVGRDGNKTSYGECCASSLTTTYSSGTRGGVSVVSTDLHNECTYHHSGTSA…
P_028	D_030	OK053_429	Prohormone-4	MSSPLRMDVTFLLVAIAVTWVCGLGIGFPGFSVSPRSFIQHPKRASCPENSCDFASPFQCGEMQTCIRLFQVCDGLWHCENGFDEDLAVCAAVLRPLECAIWEFLEEQSDWILPELFNNADSDLVAPVLHGAYSMGDLQSILNLTAQNIENIRNSTRGAIEGDERPLLALGMPEGAWNDVRYLLEELYKLGLDVWTE
P_029		OK053_430	Prohormone-4	MSSPLRMDVTFLLVAIAVTWVCGLGIGFPGFSVSPRSFIQHPKRSSCPGSPCNYSTPFLCAENQFCIRLDRVCDDMWDCVNGSDEDPYLCTAARRPPEDDIREFLEQQREWILPQLFNDKDPALVAYVLTLAHTMGDLQSTLDLTPQNRENIYNATETVIEGDERFLLSLGMPSRAWPEVKYLLETLLEGGLNVWVD
P_030	D_031	OK053_432	Prohormone-4	GMYSSYFLPPYQPSAALQALYPPYGYAAGVPGGMAWSQFGGAAWNPNFAMGYGGYPLWPSQFAHMWPMHPYYQTAVPAQEGVCSFDRPFQCWGSFTCVTIDAICDKTFDCTNHADEDPRICIAGRRPDYGILVWYLALPDQQWMLQKLFNNVDPYTTAYALKLATTLGDLRWSLALTDENINNTKTVLQAVKNDDKEPLIALGMPTSAWESVKYLMNSLLSTDFFLD
P_031			O1	LEKLFSNAHHEMKNPEASKPFFGIKDQRSEEREKKPKGNKKRRRIQEKGTSLRWNNSA
P_032			Hypotethical protein	LNQTAVDSSTPTEDLTRFCLNQTAVDSFTPTEDLTRFCLNQTAVGEEYSVTGGTSQRSKKTEAVPDRSIQSWAKTTAIEMTGTRHDHQFRHGLLLWLPLLALLSLSLPLGPARASGENQTTPVTREVTLSYLNRTLQAITNIMSFYQSQHAKVNLDGVIGMRVAQGTLKVLLENLEVRNQTGLLPEHLVVDMRSVHNFTKRVADMTEQDVAQNQKRYYGRLWPTIIDGQWELNYPTRTLNASLRTWDYDELEHMRENQSDDCVVELFGTGGNTTEPCFITDGCWINMTQMGYHRYSLTHEVFYLQLGELSGCMFDMLLKIENSNGSQPTLRFLQETFCLNILNEANYLANQSFPLNSQDLFMEQAGLCGLYGFWEFFRYSWLDNILSWQDKEAGCYKNK…
P_033	D_033		Arginine kinase	GEGEGSASAPAAAAAAEEPNEAEEMYKKLSDAESKSVLKKQLTKGVLDKLKAKKTEKGATLADCIRSGVELPDSKIGVYAPDPEAYTVFAPLLDGVIKNAHGLPEKKQINQPALDFGDLEKVKLDDLDPDGKYVVSTSVSAGRSLEGYAFLSLLTKENLEEVEQKVTEALKTLSEDLEGTYQALADLDSDVSEQLQKEGKLFADSDKGVQAAGGYKEWPRGRGLFHNADKTLVAWVNQEEHLRVISKQAGGDVGAVYGRLVKALKALGEKLTFARDDKLGYVTFSPVNLGTSLRATLTLNIPTAAQQANFQATLDKLHLQCEAAEEGAYNISNKRSVGVTEIQLITEVYNGAKDLIKMEQDLTWKPESLQEMVDHVTKTKSCKSLMKKHLTKDVADRLK…
P_034	D_034		Collagen alpha-4	MPPQCYLAPLFGICCLQPWCNFHMIYYVYTSQLVDQVNGMSACVYDGVRYFQSQTWAVGCDRFCVCNNAAIGLSVCQSVCVQYDALPPNCWLYQPPDECCPRPVCTFFTLKGVMTGMAYPSRYRGIVYSVFALQ
P_035	D_035		Collagen alpha-4	EIPDTTPEPNTTNATEIPDTTPEPNTTNATEISDTTPEPNTTNATANGTTPPPNISAIDATPPSNISGCGTKPADIVFLLDTSGSVGVANFDKVKEFVKHYVTSFKIGPIDVNVGVVTFGSVARNAFWLNAYTSVSSLLEAIENITYIGSYTYTHLGLKFVRDQAFTKAHGDRDGIANILIVVTDGESYNPTYTAEEANKLHNTDISVIVIGVGDANDDELNIIADNEASVFHVTNFDSLETIQDRLKSSTVQRHLLISVKSLTQHLNPTLLTPLPMVQRHLCVEPMVQRHLLTSVKSLTQHLNPTLLTPLDVTQYKLTLCFCWTPRGVLVLLTSRRSKSS
P_036	D_036	OK053_394	PDI-A2	MKFSSCLVLTLLVFVSAEDVEQDENVHVLTKKNFDSFITDNEFVLVEFYAPWCGHCKALAPEYAKAARTLENEKSNIKLAKVDATVEGDLASKFDVRGYPTIKFFRKEKPDGPADYNGGRQAQDIVDWLKKKTGPPAKELKEKDEVKAFVENNEVVVIGFFKDQESTGALAFKKAAAGIDDIPFAITSEDHVFKEYKMDKDGIVLLKKFDEGRNDFEGDLEEEAIVKHVRENQLPLVVEFTQESAQKIFGGEVKNHILLFLKKEGGEDTIEKFRGAAEDFKGKVLFIYLDTDNEENGRITEFFGLKDDEIPAVRLIQLAEDMSKYKPESSDLETATIKKFVQDFLDGKLKPHLMSEDVPGDWDAKPVKVLVGKNFKEVAMDKSKAVFVEFYAPWCGHCK…
P_037	D_037	OK053_319	T	MRCLPVFVILLLLIAFTPSVDARPKTKDDMPLASFNDNAKRILQILSRKPCCSIHDSSCCGLG
P_038		OK053_322	T	MRCLPVFVILLLLIASIASDTVQLKTKHDMPLASFHGNAMRILQMLSNNRYCCIFDHSCCLWP
P_039	D_038	OK053_327	T	MCCLPVFVILLLLIASAPSVDAQPKTKDDVPLAPFHDNIKSTLQTLRKKFCCRPVTPCCAGK
P_040	D_039		GGNG-1 precursor	MKTDIQQALCLAMTSFFILSAIIKPSEEKCVGEWAIHACWGGNGKRSGPSTDLAPAPNSLRQLLLLRNRPVFAPGLDRGEGLALSGQSSDVDSSSSYNRDLSDYNVLPSRSRLAALLKTLRTLQRENRELP
P_041	D_040	OK053_093	F	MQRGAVLLVVVAFLALWPQAGAEPYDLNDPDVKAMINDGRKLMDTCAEANHYIDDRWSTYSIVYFEDKGLYHRMLAELVPCLNAFLRTRQEAP
P_042		OK053_090	E	MMTRVFLVMFFLLVLTEGWPRLIDSDCERGRNMHITCFKDQSCGLIVKRNGRLSCSLNCKCRRNESCLPSEEVDWDHRDMKIVICPKPWF
P_043	D_042		Collagen-alpha-5	MLAIFALSLLIFTQTTLASSSDDDWLDLRDLSRLLDAEKRYADMYAASMRGKKKKATIKPGYEEKCDQDPIDLGLIIDSSVSIAARDYKKGLEFLAGFLDEYNIGPGDNQVRVAAVSFGWGVYKEDGFNFTAFDDKEQVKKRVLTMPFRAGRRTDTGDALKHMRELQMTSRRSWAGQIVVVLTDGDSQRGSYTASQATETKESNITVFAVGVGRVKYQELLNIAGGVKEHVFQAASYDDLDEDIKKELTRKTCKLVPKPTTTTVPSTPATQPCGLEFPADINFVFSAATMGLEQTSTVTSFISNVIRHEELNEGFQYGVVSGDYPDDEGFRLNQYQNSEAIRRHLERYDRNNLPHVVQRATETRFTNENGARVNATKTAVIFLGNNKVNEKELTEAIEK…
P_044		OK053_100	H	MRTSGRLLLLCLAVGLLLESQAHPNADAGDATRDVGSDRTSVELSKMLKRWQAEKGQRKASAHDEEGSFYIFDPNRRSFY
P_045	D_043	OK053_315	S	MSKMGAMFVLLLLFTLASSRREGDIQARKTHLKSDFYRTLPRFARGCTISCGYEDNRCQGECHCPGKTNCYCTSGHHNKGCGCAC
P_046	D_044	OK053_205	O1	WTCATADDSGNGLENLFSNAHHEMKNPEASKLNKRCKEADEPCSIFSLDRCCSGVCFGICMS
P_047	D_046	OK053_211	O1	WTCATADDSGNGLENLFSNAHHEMKNPEASKLNKRWCKQSGEMCNLLDQNCCEGYCIVLVCT
P_048		OK053_206	O1	WTCATADDSGNGLENLFSNAHHEMKNPEASNLNKRCAPFLHLCTFFFPNCCNGYCVQFICL
P_049	D_051		Transmembrane protease serine 3-like	RVVGGSATTTRSFPWTVLIKRYGHSDVVCTGAILTTRLVLTAAHCFDNVHQSYLYMWVGKDQMDYTDIHQQLHFVERVDIHHTYNRSNKINDIAVLQTANDMRFNSNVRPICLPDAHTQLPPTVHCVLAGYGDTLGTGFERRLNYIEVPMVDDSLCGQDDWLGADFQAVQGVSFCAGYGDGGPDACSGDSGAALVCPHPTDHYYYVYGVSSWGKGCGERRKPGVYTRVPVFLDWITSILNAPLRH
P_050	D_052	OK053_086	CAP-superfamily	MLSTMQTVGAVLMLSIVLVAGRKRHHCDSKYYELTPAHTMCLTDKPNAVAVPLTQEVTHEIVEMHNAIRADVRNAANMLKMEWDERLATVAQKWAMQCILRHDSGRRGEPDLPGFVGQNVAWSSGDLTFLEAVQLWANEIVDFQYGVWTYGTGHYIQQVFAGASRIGCGQSACGNDKYFVCNYYTGTMGDTPYELGAQCSQCRASCQNIRGSNGRWGRLCDCTNGPDACFNGGYFNINTCQCECYGIWRGADCQEK
P_051			O2	ILLLVAAVLMSTQALIQSGAEKRPWENIRFLSKRKTNAERWREGSCTSWLATCTHDQQCCTDVCYKRDYCALWDDR
P_052		OK053_260	O2	MQKLTILLLVAAVLMSTQALPQGGGEKRPRENIRFLSKRKTNAERWREGSCTSWLATCTHDQQCCTDVCYKRDYCALWDDR
P_053		OK053_253	O2	MQKLIILLLVAAVLMSTQAVLQEKRPKEKIKFLSKKKTDAEKQQKRLCPDYTEPCSHAHECCSWNCHNGHCTG
P_054			O2	ILLLVAAVLMSTQALPQGGGENRPRENIRFLSKRKTNAERWREGSCTSWLATCTHDQQCCTDVCYKRDYCALWDDR
P_055	D_057		O2	MGKLTILFLVAAALLSTQIMVQGDGAHERTEAEEPQHHRAKRQDGTGGSPVDDVDMMQRIFRTPHKRQWCRPGWAYNPALGRCTISKSRIEHPGNYEYRRGRQ
P_056	D_151		O2	MEKLTILLLVAALLLSIQAVNQEKHQRAKINLLSKRKPPAERWWRWGGCMAWFGRCTKDSECCSNSCDITRCELMRFPPDW
P_057	D_148	OK053_272	O2	MEKLTILLLVAAVLMSTQALNQEQHQRAKINLLSKRKPPAERWWRWGGCMAWFGKCSKDSECCSNSCDITRCELMRFPPDW
P_058	D_149	OK053_273	O2	MEKLTILLLVAALLLSIQAVNQEKHQRAKINLLSKRKPPAERWWRWGGCMAWFGKCSKDSECCSNSCDITRCELMRFPPDW
P_059	D_150	OK053_274	O2	MEKLTILLLVAAVLMSTQALNQEQHQRAKINLLSKRKPPAERWWRWGGCMAWFGRCTKDSECCSNSCDITRCELMRFPPDW
P_060	D_058		NA	MIETTPGGESEKSDNVSPKVRTRPPNVITSETVTVVDGDNVTYICNTSYICDDKVTFKWFKNGAELSDVKGQKYTFVSSLKDNKNKFSCLIIITPGGESEESDNVCLEVRPRPPTIIPEIVTVVDGDNVTYTCNTSYTVNDEVAFKWFKDGAGIPDAKEQTYTFISSLKDNKNKFSCLIIITPGGESEESDNVCLEVRPRPPTIIPEIVTVVDGDNVTYTCNTSYTVNDEVAFKWFKNGAEISDAKEQTYTFISSLEDNKNKFSCLIETTPGGESEKSDNFSPKVRPQTPNVTTETGTVTAGGNITYTCDTSYTASDEVIFRWFRNGIVIPAAQNRTYTFNVSPVPQNDSFMCSVETTPGGESNKSDPVTPNAPQCLYKGKQYGQGVQWEDGCDYACEC…
P_061	D_060		NA	LFNNTDDEIVKALREAKSLDELKKKLRLSEDKVNNLRTVFKAVKEDNVKVIIELGEKEDHWQDFKKPFKAILDSEFQV
P_062	D_061	OK053_072	Aboa_01	MTRNMKMTFSGFVLIVLVTTVVGLPDHRGEVSDNLSHCRLPEFRLCLLECWIEDERYCFPGCTFGILLEHGFHTIRPDCNVFKFCYYRCILLGKTEAHCWNGTAASVTGDKADLDTC
P_063	D_063		M	MLKMGVVLFIFLVLFPLATLFPLATLQLDADAPQPVERYAENKQLLSPYERREIILHALGTRCCSWDVCDHPSCTCCSG
P_064	D_064	OK053_150	M	MMLKMGVVLFVFLVLFPLATLQLNADQHVERYAENKQLLSPYERREIILHALGTRCCSWDVCDHPSCTCCSG
P_065	D_065		Carbonic anhydrase2	MAPLLCLGLLASLWLPACSGSNDVHWTYSGENGVDHWATLFPTCKGQSQSPVNISTAQTKKDKKLTPFKLINFDQVNDIEWSLQNNGHSAQVTFGGKKDLFVKGGGLGAGSKYKVAQFHFHWGSNDSVGSEHTVDDHRYPMEMHIVTYNTKYGDMGNATQFKDGLAVLGAFFEVDTANNDNFDGLICALGNVQMPGNITQVNPVQLKSLMPETDKFFRYSGSLTTPPCSEVVIWTLFKRPVPISSSQLAVFRALKTETENGVFEPLVDNFRPVQPLNERQITQTTEED
P_066	D_067	OK053_106	H	MNTAGRLLLLCLALSLVFESLGIPVADDVEADRDTDPDDKDASVHNSWRVEMDCGGVPCKFGCCIEDRCREIGCD
P_067	D_068	OK053_283	O2	MENLTILLLVAAVLTSTQALIQGRGERQKAEINFLSKRKSTFWRWWDGDCRTWNAPCNPGVECCFGRCSHRRCVFW
P_068	D_069		protein DDB	MVFSVVNLWKSMSVGWLVVVVSVVTHCWPSAVVSATCPWEEEGLSNWSASDTWGGAGVPPTASEVTIPAGRRVLLDVQPASLTSLTIEEGAALIWGDVDGLELNTHYIFVKGEFLIGSQSCRFEKEAKIRLHGRVNDDFEVDEFGRKFIGVAPGATLEMHGQRKTPWTKLAQTVRPIKDVDCAVIYDHTNFEQNKARLISPNGLNVLVWNQDGSFMDFSSFKTYGEFPDFFGTIPEGKVVAMYAYGDNGIGTKKDSLVDTIVSLGGTKIRDAPNKAKYSFIGRKGSPDTVKEVVSSGSDGKEEYLNLDDTDRALVFQVALNRETVKQTMMFRVLHFDAAYPKLTLVDEVVGWEEGDEVLLTSTDFDWKQAETRRIVGCDDCTPRQVRINAALTYMHYGN…
P_069	D_071		von Willebrand factor A-like (glycoprotein )	MEEAEGKTVNQVLVLVTNGPLNESQAIEDAVQNLKNGSVKIIVLDVGEPTSWKELQNPAALALQLHFSLVDVGALTSARDNVVKLVCQGLLEENGLNEITNETIPFWNAM
P_070	D_155	OK053_335	T	MRCLPVFVILLLLIASTPSVDAQLKTKDDMPQASFHDNAKRDLQRLLRTSDCCFYHNCCC
P_071		OK053_332	T	MRCLPVFVILLLLIASAPSVDARMKPKDMPLASSQANVKGIHHILQIKNMCCGFKPYCCNW
P_072	D_072		T	MHYLPVFVILLLLTASGPSVDAGLKTKDDVPLSSFRDNAKSTLRRLQYKQACCGFKMCVPCG
P_073			Neuroendocrine convertase 1-like	MVKNYVVVTVVVIAAALLLRVDPADGKEEESSYLNEWAVEIEADLNHARSVAERHGFELLGQDVLQVTSRKRQTGQDYKAVISQGLNDIVKTLWREKRRTRAFECYGTGDLALTYDIVVTVPSSPVR
P_074	D_075		NA	MADKRGHRSYVDAGKTFGILGGGNVDWTEPEQEVFQRILNELNSILSELEAILPSQTAE
P_075	D_076		NA	HRPWEWNVQPSRHSQQGAGFNTVEKKKEKTRNAFEKEQRKRKQKSQTTATCAALVSCQTSTDDKEQADHFKSWWRPVSQSYKRQCTRSHRSLLGWTCCHTHTRGLVIVSHTTHTLSLAVAVATVTSPGKLIGGKSSIAVSSTTKMMNLLTLVLVTLPGLTLSFTNNDPSNDPLKDLNEELQLRVAPPSPAISPDDIDALLREAPRVASRRLTEANGPRGYYQSAEAQLRDSLLSEILRLDRRGGGSGLTTYDGSAMADKRGHRSFGILGGGNVDWTEPEQEVFQRILNELNSILSELEAILPSQTAE
P_076	D_077		O1	LTCMMIVAVLFLTAWTFVTADDSSNGMENLFPKAGHEMENLEDSKRVKPCRKEGQLCDPIFQNCCRGWNCVFVCI
P_077			NA	MPFQDDGFLDIPDCAEDYQPCGVRFTTTERDESGNIEAESRDFVLCRCASDTECPFDTSPQSQLIHIHRGRYKKQRSSDTRQTSTLMFCRAVWPSEQCEENSGVTLTIHGPTKQAEIPSGRVQVHCSCPDHLPLIMHSQTRLQNHTQERQWRFEYVCNRFKSTCERNQETCMTTQRLPDRTRIITYSCKCEYGSCKQRGAKSKCKESRILNYP
P_078	D_078		NA	MVTPVLRLLMALSLARASYDLQSFAKTHLMDDGFLDIPDCAEDYQPCGVRFTTTERDESGNIEAESRDFVLCRCASDTECPFDTSPQSQLIHIHRGRYKKQRSSDTRQTSTLMFCRAVWPSEQCEENSGVTLTIHGPTKQAEIPSGRVQVHCSCPDHLPLIMHSQTRLQNHTQERQWRFEYVCNRFKSTCERNQETCMTTQRLPDRTRIITYSCKCEYGSCKQRGAKSKCKESRILNYP
P_079	D_079		Metallopeptidase	QGLGMQPWMSLGQSAPPSYDMEAMLVKLAYTGITPFFRVLVDADARNNTKQIVWINPGMLGISRQYLVLGRTSLEVITYKKWCYDMVVNVLGLQPSRALNRSVSEAVDFEVKLADIYPRSLRASAVASGNHKTFVLSQMDAVYPNFNWAKYLKLFFQMSQVKLPPDLNVSVHHEFVQNLTAVIAQTDKRVLANYLLMRVVRSSYSYLSKEIRDLDIPMRTALFGMNQSLIHWQSCVTFLTKVMMNAVGSMYVTHHFSPQSKQKATEVVEFIRDAMQEIIRQSRWIDNATKAKALEKSEKLQANVGYPENLLNKTYLEAMYRNVVFDPKALYKNVMQVHFLSTSGNAKALLSPAPPRQQWIVSAADVNAYYDSTSNVMFCPAAMLQPPYFGDKFPMSMVF…
P_080	D_080	OK053_439	Thyrostimulin hormone beta 5	MVMPLVLSLALTPPPLCHATLVDPSTTLECHVRSYTYRATKPSIINENGDLVTCQGNVRVNSCWGRCDSSEIGDYKMPFKISNHPVCTYTGRVSRTVSLSQCVGYPDPTVQVFDATGCSCQFCNSETTSCENLNG
P_081	D_081		EF-hand (Calcium binding)	MAQVSRKSLLRTLAEMLAIWLVCLLAGSSCAVFYTQSNNNDFPRLGRRSIFTAAGDDKDGAYPRIGRSLSSPDAALSSLYDASFQPALVHKRGIFTASGPGFPRIGRAQSKRSRNGKLLPAVSEVMASVDVPQGVRGSEEEEEAEDGVVDGEREGAAARFEYPLGLLFFELDKDGDKSLTRDEFVQGMARARQDRTLFR
P_082	D_082	OK053_438	Thyrostimulin hormone alpha	MGRRDSGRAVAQRYRGVTRGVTVIACLMAVCACVGLCDATGRKRHSWEAPGCHLVGHTRVVRIPDCVPFQITTNACRGFCVSYAIPSPYQTLAYNPNHIITSRAACCDIIDTLDIPVQVTCMDGVKDIVFKSARSCACSICRRE
P_083		OK053_164	M	MSKLGVVLCIFLVLFPMATLQLDGDRTADRHADERGQDLAEQYGNLKHVMKRSSEHRAHHTHPHDNSFWTLV
P_084	D_083		Serine protease hepsin-like	MTAIPVLLLSLTTLLLALQGLLEIGDIGRGHSLVPECGHPVVQPASHLSRRIVGGHEALRGSWPWTVSLFELDMPACGGAIISDRVILTVAHCFEYPVSRNASRWTVRAGEHSLLETDPGEMSFPVERIVLHEHYNNTTHENDIALMVVSDSILFTTLIRPICVPHYPPHAALPPGTACMIAGWGDTKGTGPRGVLMEVLLPVISDDVCSLPNWYYNHFIPQKTFCAGYEEGLKDACAGDSGGPLMSKLDDRWYVSGIASWGFGCGERRWPGVFTNVTYYVPWIHTQLTAVGLPGLFEDSIVG
P_085			NA	ADTPSPLSVSLTAAFSRPCRHLSAHLVSVTGGKNRLNCCDGRLKRKKKNNLQSKTSPLLGEGFSLKEKDNPFSMQYRKKTTSSSLPSISVLLPLLSLFLSLLAPQPCSGVDVEKLCAARCRLGMGGNLCNCSTSHFAGKRGHEGVAATAAAGSGREDVGDNMGSRSWLELALRDMIKMALDDRLIDSYEASRKRNHAVALPYQDADLVY
P_086	D_084		NA	MALSHQHGSSSSSHERRGLASCHCRRVARADRRRGSRGAACLLVLLSVMGSVTPGAALDLCEDRCLQARPNLSRLHDLWSRSYRRVGDREVSFEEFMVALIQVSRDNGNSQVSNTLLNLMGEYQECILACEHFHSKRSAGSTPYGHPFSKRRPGIAPYEHVFSKRRGGTARL
P_087		OK053_385	Insulin	MTTSSYFLLVALGLLLYVCQSSFGGEHVCWLGDPNHPQGVCGPQVANIVEIRCEEKEAEQGGANNARANTGRTSSLMKRRGFLSLLKKRGKRDEGSPLQRSGRGIVCECCKHHCTKEEFTEYCH
P_088		OK053_377	Conorfamide	MSGRGFLLLALLLLVTVEATTVEKNKPGVLDIPVKSNSDDDSIFRYGRRDMQSPLLSERLRF
P_089			NA	MLFRLVFAVGLLTAISCSPQQGSQHQSASHSLTNLEADFWDWRMRDAPLFSTAVGETRYNGELESYTLSVYDGRKRAVEGYLHRLQGISKDHLNDSQQLDYDIFTDYLQTYLDGARWNNYFAVNAVNFLEGINADAGRLQTVLPFSTVEDFQNYLSRLTKLPAQIEEKMELLRTAVSTGRTLNNVSVLVVPVQIDRLVHQNVEDSEFYHPAFTSVLDASNIPTGQRAALRSEGREAVRLITLALRRLKSYLQQSYLPATRPTWGLAALSDGREMYQQCLKYHTSTTMTAREVHDLGLREVARIRANMEAALQRLQFGGTIKQFYDGLRTDPQFHHNSSQALLDNYHDFIFNRIMPKIRTVFKDIPDLPLRIEPMPYDGPGGIYLAGTPDGSVPGIFYAN…
P_090			NA	MLFRLVFAVGLLTAISCSPQQGSQHQSASHSLTNLEADFWDWRMRDAPLFSTAVGETRYNGELESYTLSVYDGRKRAVEGYLHRLQGISKDHLNDSQQLDYDIFTDYLQTYLDGARWNNYFAVNAVNFLEGINADAGRLQTVLPFSTVEDFQNYLSRLTKLPAQIEEKMELLRTAVSTGRTLNNVSVLVVPVQIDRLVHQNVEDSEFYHPAFTSVLDASNIPTGQRAALRSEGREAVRLITLALRRLKSYLQQSYLPATRPTWGLAALSDGREMYQQCLKYHTSTTMTAGEVHDLGLREVARIRANMEAALQRLQFGGTIKQFYDGLRTDPQFHHNSSQALLDNYHDFIFNRIMPKIRTVFKDIPDLPLRIEPMPYDGPGGIYLAGTPDGSVPGIFYAN…
P_091	D_088		NA	PGGTASQGDDSGTEKRSWPPGGTASQGDDSGTEKRSWPMTYADLKRTFDSIGYYSHFGGFGGGK
P_092	D_089		Angiotensin-converting enzyme-like	FYNAKDFRIKMCTSVNQEDLVTIHHEMGHIQYFMQYRHQPQMFRDGANPGFHEAVGDTIALSVGTPGHLRKINLLEGGQNNELDDINFLMKMALEKVAFLPFAYLVDQWRWSVFSGVTPPHRYNPEWWRLRCQLQGVSPPVDRSSEDFD
P_093	D_090		Angiotensin-converting enzyme-like	SEPWQDVLQAFNGQRSINASAMLLYFQPLADWLEEQNAGDTPGWSDHCPLGTTEKIRDENVARSWLQKYNQEYKDISSKSSEMAWNYATNITKENQQEQVDSELQAAQWQQQKAAEVEHYDWEHFSDSSLVRQFRFAGNIGTSAMKNETKLKELRELHSTLEGTYAKAKVKDPKTGAILNMDPELTQLMASSRDYDELLMAWKEWRDVTGPLMKNDYEQFVALSNEAVRTLGFKDTAELWRNRYESDTFQADLEALLKQLNPLYAQLHAYVRRKLVEKYGADKFPYSGHIPAHLLGNMWAQTWDNLFKFLQPFPNKSAIDVSQELLRQDYTVTKMFTTAEEFFTSLGLKPMPRSFWTDSMFERPQDGRDVVCHASAWDFGNVKDYRIKMCTVINMESLI…
P_094	D_091		Angiotensin-converting enzyme-like	MKATHGRCLLVMVMGVVAVTMMMAVAEASEGKRQHGRWAWSHGKHRWLELLELLEEMLSATDAELENELVGGNEDDTYTTSYYSSPEAARTWAERVDKELLYWNHKSSEANWDFITNVTEDTKNKYIAIVDQLSNWSKPTTAEGRKFNTEHFDPDLKRWFRIITMSSSPKDPNKTREITKLHTTMMTTYDTARVCLTDHHRHHAHRRQWQQHQHQQQQQQQQPLKNDNASGCLSLEPELQDKMRESRDPEELRELWEGWREVSGKPQRELYAQYVDLLNQGARENGFADYSDYWSQEQFPDDTDLDAMTSDLWRQLRPLYLELHAYVRGQLRHQYGSGIVGTDGTIPAHLLGDMWAQAWSDIFSLVIPYPEVSQNSSGLDQKLKDQYDVRGLFELAEKF…
P_095			NA	MMKRVMLIVVLCAAVSMGLSLPSLRDLDSAAVEEPPSEIPDAVANAQRTAKLIRDAVEVVIRYLELERQTGPYGYVGRKRNYPGRDETEYSPSQ
P_096			Elongation factor	MGGKDKTHINIVVIGHVDSGKSTSTGHLIYKCGGIDKRVIEKFEKEAQEMGKGSFKYAWVLDKLKAERERGITIDIALWKFETEKYYVTIIDAPGHRDFIKNMITGTSQADCAVLIVAAGTGEFEAGISKEGQTREHALLAYTLGVKQLIVAVNKMDSTEPPYSEDRFNEIQKEVGTYIKKIGYNPKAVAFVPISGWHGDNMLEASEKMPWNKKGWLIERKEGKAEGRTLLQALDAILPPQRPTDKPLRLPLQDVYKIGGIGTVPVGRVETGVLKPGTVVTFAPANVTTEVKSVEMHHESLPEALPGDNVGFNVKNVSVKDIRRGNVAGDSKNDPPKEAKSFYAQVIILNHPGEIKNGYAPVLDCHTAHIACKFTEIKEKCDRRSGKKLEDNPKAVKSG…
P_097	D_093	OK053_347	T	MRCLPVFVILLLLIASAPSVDARPKTKDGMPLASFHDNATRNLQILCCKHTLSCCTGK
P_098	D_095		NA	YRLLRDGMYNVTASARGYHPVTKCVTVENQNYVGASRFVTAKEVNFVLTLAAEAKPDGRVDAYYCHHLQLIAERAQEKAGDVLQDEQEIKVLLPFLRTQTDARA
P_099		OK053_174	M	LDADQTVERYAENKQLLNPDERSGILLPALKKFCCDSDWCHLPECLCCNR
P_100		OK053_290	O2	MEKLTILLLVAAVLMSTQAMFQGDGEKSRKAEINFSETRNLARNKQKRCKTYSKYCEADSECCTEQCVRSYCTLFG
P_101	D_096	OK053_309	P	MHLSLARSAVLMLLLLFALGNFVVVQSGQITRDVDNGQLTDNRRNLQSKWKPVSLFMSRRSCNNSCNEHSDCESHCICTFRGCGAVNG
P_102	D_097		Nucleobinding-2-like	MGWKAVLYTLAVLAIMLLPAGGKPVADKRGPPHPDPVEAGSKEDDDRGTGLEYDAYLRQIVEALESDTEFRKKLEEANVSDIKSGAIAMHLEMVNHSIRNRLDEIKRMEVRRLQELALVRMKSMSGVGVNRMDIPTHLDLVNPHSFEMKDLESLITKATKDLEEMDRKRKEEFKTYEMEKEFEYQQKLKDLPEDQKKDVEEKHKELQEKHKKHEKINHPGSKDQFEEVWEKDDHLEDQNFDPKTFFMMHDLNGDRMWDIQEVEAVLQRELDKVYDSRNSPEEDDPNERFEEMSRMREHVFKEVDTNKDFMITMEEFLSYTGQTGDNAKFKEDEGWETLDESPQFTDDEYEEFIRQHHPDLITPKPEDLKFVPEGQAHQQGMPQQQPGQFNAQAGQGQQG…
P_103			NA	MFVITFFSAFNVSLLRIQGPDPECNFLIDNVSLVEIDENPDWLAESRVRIDTHRKSDIELKVHIPDDVPKAEVDVQVRLKKHLFAFGSKVEDKFLRGSKKLDKKFQELFYTLFNWATLGSFKWKFDKGKSLNEPDFSEALGGLEKLREHGLKVRAHSILWGVKDNIPDAVLKTPPEELQAVVDFHTEYMVNITHGRVEHWDVQNELLHGQWYEETLKDPDFTKNLFKHARRLDPYPKLYLNDFQGVTAGGNTEDLYDTAMDFIAAGTGIQGLGIQGHTKEFTLPHPTMMWRRLDRLQQTGLDMFMTEFDIGWLDDIVRADWFEDAMRAFYAHPGLSGVILWGFWERMQRFKHKYLVIGDDLQFAEPGQRWVCLVKKEWTTNETFNMADLSGDTIQLRGF…
P_104	D_100	OK053_116	I1	MKLCVTFLLILVILPSLTGEESSERTLSGAALRGDRGMCSDIGQGCGQDSDCCGDMCCVVQRCVMTIITCTF
P_105	D_101	OK053_118	I1	MKLCVTFLLILVILPSVTGEKSGERTLRGDSLVGDWGTCSDRGQECKHDYDCCDDLCCTGITCQFTYFSCK
P_106		OK053_111	I1	MKLCVTFLLILVILPSVTGEESSERTLSGDTLTGDRRTCSNKGQECGDNSDCCWHLCCVDNKCAHLILLCNL
P_107	D_102	OK053_113	I1	MKLCVTFLLILVILPSVTGEESSERTLSGAALRGDRGTCSGRGQECKHDSDCCGHLCCAGITCQFTYIPCK
P_108	D_103	OK053_115	I1	MKLCVTFLLILVILPSLTGEESSERTLSGAALRDEWGTCSHIRQGCKHDSDCCGHLCCAGITCQFTYIPCK
P_109	D_104		Gelsolin-like	PGLKIWRIEQFEVKDWPEEDYGEFYNGDSYIILNTYKDEETEDLNYDVHFWIGKNSTQDEYGTAAYKTVELDTLLDDKPVQHREVQGHESSLFKSYFPKGIQTMEGGANSGFRSVPDKEKYEPRLMRFAKDKGGNIVVREIPRACSLVTSGDVFILDAGLKLYQFNGCSCSPMEKSKAMQYIGDIKSKRGEAESEVLDEADTSKNHEFYTYLDEEPEDDGCTSDDEDGDDAKKLLRVNTDTRDFEEVKDGDVTQDDFKSDDVFIYDSGDTVFVWVGCNASSAEKKNGLPLAHNYLCKCGSPWKSITVVKEGAKSKQFASALAA
P_110	D_105		NA	MAMMRLCNWLLVAMLMSLTVCEARGLPQRSAPDSDEIVADIEAAIEQLRQDVNRLIAEMDLMMAMEPPEAGCDGYPCMYTHLGAKAGQAANKSAQLAALSRCAHNPECAPGKRRRRSARAQAIMSLRKRYEKTTS
P_111	D_109	OK053_139	J	MASVQSVTCCCFLWLMLSVQLVTPSPPGTAHLPRDGTDRDIPNDDESAVCYFLCLMGINLDECNCPEKRDLVFTDQ
P_112	D_111		R	MVSSFLARRPEVRQPEFAEASVGQKRGALGQCINNCLHSGGGLNFIQCKAMCH
P_113			A	WGPDGRETASAASGDSTRHAEQGRRESEKITMGMRMMFTMFLVVVLPTTVVSLTRRAGINDVCKSWRDCPQGADCYVDVGLRCRWPSDHSCTANNQCSVDSCINGICKANIGGRCLSDRDCPKGATCKSQE
P_114	D_112		A	MGMRMMFTMFLVVVLPTTVVSLTRRAGINDVCKSWRDCPQGADCYVDVGLRCRWPSDHSCTANNQCSVDSCINGICKANIGGRCLSNKDCPEGATCKSQGWLNFEKKCET
P_115	D_115	OK053_400	PDI-A2	MKFATVFSLTLLAFVACEEVEREENVYVLKATNFDNFIDENEFVLVEFYAPWCGACKNLAPVYSEVAKKLMDEGSNIKLAKVDVTVEKDLAANFNVTGYPTIKFFISGEPMEYTGGRQTSDIINWLKKKTGPPAKEVKTCEEAKTFIDSDEVIVMGFFKDQEGKGAAAFKKIAAEIDDVAFGITSEDNVFKEHKMKKDGVVLFKKFDEGRNDFSGDFEEAAMSKFIKDNYLPLINEFTQDTAQKLLSGDVKSYLMLFVKKEGAKDILDTFKAAAGEFKGKVLFIYLDTAIEENERVMEVFGLKAADTPAMCLIQLDEDLVKYKPESDSLDKSTITKFVQDFLDGKLKPHLKSQEVPEDWDAQPVKVLVSKNLKEVAMDKSKAVFVEFYAPWCGHCKELA…
P_116			Pro-neuregulin	MEKKSVRVFSSGVLLMLLALRAVTVDSTGVEDVKDRHLTPPCIGVNCALGQVLFIRGHGRRQGPVAGGASVLPQSRRASRVVVNVEKEVSSHRVPCTAEEARQTACINGECYALDMGELRSPFCDCPANYEGSRCEQLSSYYYENYSKRMTRIG
P_117	D_116		Pro-neuregulin	MEKKSVRVFSSGVLLMLLALRAVTVDSTGVEDVKDRHLAPPCIGANCALGRALIIRGHGRRQGPVAGGAHVLPQSRRASRVVVKEEEEVLSHRLPCTAEEARQTACINGECYALDLAELRSPYCHCPAEYEGSRCEQLSSYYYDNYYQRITRIG
P_118		OK053_009	A	MGMRMMFIVFLLVVLATTVVSSTSGRRAFRGRNAAAKASGLVGLTDRRPECCSDPRCNSTHPELCGGRR
P_119		OK053_130	I4	MSGHTSVNFLLLSIVALGMVATVICSCDSEFSSEFCEQPEESCSCSTHTCCHWSRKDQCMKPQRCISAQKGNGRRRLTHMQK
P_120	D_118		NA	MNPPIKMPVIASLLLLIMTTWQVSVGDSSGNMLANPSFEDNLRGTWKANAFTMEKYTGDTVDGQYSLRCTGRSRDVEGPYQVGINLIKGHHYVFEGYVKILNDKVGKIWQSFKTVLQMNLPGQVKRQSYIIAYRGFVQTSNNWILLKGSIEAPMLDPSDVRIAIRGPDPEVDFLVDNLTLYEVEENPNWLREAHSNIETYRKSNMNFHLALPPAMTKNDIQLKISLKKHLFVFGAKIEEYELVKEPRNMYTELVYNFFNWATVQAYKWKFNKGGRYDPNFSRATNATTALLENGMKVRGHSIFWDIEKNVPDWVKELPDEELLPELERHVKYMMNLTYGRLEQFDVQNEHIHGHYYEEKLQDSNVTKNMFRLAKQLAPESPDLYLNDFTCITSGANTED…
P_121	D_119	OK053_242	O1	MIVAVLFLTAWTFVTAVPHSSYALENLYLKARHEMENPEASKLNTRDDCEPPGNFCGMIKIGPPCCSGWCFFACA
P_122	D_160	OK053_183	M	LTICLLLFSLTAVPLDGDQHADQLAERLQDRLPTENHPLYDPVKRCCNDSECDYSCWPCCIFS
P_123			NA	MKLLLSLILLAAILTVTMATGEGETYVALFPSAKNLEVNREKPMWCVYCSCLPNADIPCGASSPCCT
P_124			Carboxypeptidase E-1	DDLQPETRAVMRWLSKIGFVLSANLHGGDLVANYPYDAGRPGQVVRYSDTPDDATFIELAKSYSYFHGKMSD
P_125	D_120		von Willebrand factor A-like (glycoprotein )	TFICPGTKINLEDHFVKSDLLKWISKLEYKSDGATGNAGEALDHLRTIMFARGSARPDVPHIGVIITDSRMGYLGGQEELAKQEGITLFVVGIGDGISAVELNQVASDPDETH
P_126	D_121		NA	KKSRQLTTQMFACLHSQEKEIAIVDDMKRQPFVPVVITHSYTSKNDTLVVCQTVIFTMMISASIVMFLTVMVVKSTHIARQREVQCYAFRQVDCVYDDVCSVTRIMGCLQYCHCTYNRVCDHMAVNATDGYTYGLCRRPEEYMPCHDGEMPVMGEQFPDVYAFKFWCSCTNGYKYQPTIRNITCV
P_127	D_122		Carboxypeptidase E-1	LLRLIVYLCDEFLNGNKLVTFLVHNTRVHIMPTMNPDGWQKAYEEFKGKQTVDWLNGRSNANGIDLNRNFPDLDKIMFENEKEELERNNHLETLEE
P_128			Synaptic vesicle membrane	MPGEEETPATKGAPATEANAEETPKAEETPKAEETPKAEGKAEEDKVKEEEKKAEEVKTMRCVVLAGFGGTKMMREQRRPQPSPAQGQLLIRVSACGMSFQDLMLRQGIVDPQPRTPLIMGSECAGVVEALGPDTQGFTVGDRVIALTNCRAWAELVVAPVTQVYKLPDSIDFQDGVSLLMQYITAYILLFDL
P_129			Immunoglobulin-like domain	ATQQNYSFISSLGHNYDKISCSVVTTPGGESEDSTHAILKVRPETPSVTPENITVPDGEKINYTCNSSYTLTHTVTFRWFLNGAAIANATQQIYSFTSALGDNNNNFACSVEATTGGESDKSTPVSPNVRPKPPSVTPVSITVSDGEKISYTCNTPYTTKDKVSFKWFRNGTNIASATNQIYTFTSSLGDNRNNFACRVETSPGGGSEKSNAVSPDGLYSVCLSVRQSVSLSVFLCVSHCLSPLLAVCLCLPPSLSLLVLLAQKQT
P_130	D_008		Immunoglobulin-like domain	ATQQNYSFISSLGHNYDKISCSVVTTPGGESEDSTHAILKVRPETPSVTPENITVPDGEKINYTCNSSYTLTHTVTFRWFLNGAAIANATQQIYSFTSALGDNNNNFACSVEATTGGESDKSTPVSPNVRPKPPSVTPVSITVSDGEKISYTCNTPYTTKDKVSFKWFRNGTNIASATNQIYTFTSSLGDNRNNFACRVETSPGGGSEKSNLVSPDVKPKAPSVTSENYTASDGEHITYTCNTSYTSNEKVRFRWYKNGTVIPQATQQNYSFISSLGHNYDKISCSVVTTPGGESE
P_131	D_125		O1	LFNLLKELNIHYLECPHRILLYRLKLRRERKREAEERRQNPCSLLSIAPLQTPYQRSVVNSNCYVYSKNDILRVSLHTDNQIWSACQKKNFRLMVQFWNASQFPQNSFTKRLHKKRKQKKTREAGTITHLTFKKKKFPKSKSYADKKNFKFHIMWPRIKMQDHLLKTKNKNKTKQKLKCTTTPTNTHLKCRQCEQNTVFCVDKDFILSVAQIFYFFFQIFYFFLQKPYSLFLWRGIPKTFLADYSLSSSSSSFSFFEFSFLLFHFFLSWFSFFSIILTNIGISLSLSLSPPLSLSLSLSLSLSFSLSLSLLSMSCQNNAEKCVDFSYVMQKLKDVVVYLQKWTKCVLQMHTEAGIDEIIVCNRNHAKIFMRKCNKNAQNMILLCDRNANVFSTVMRKKN…
P_132	D_126		von Willebrand factor A-like (glycoprotein )	NPHNTTQHYRHNPHNTTQHYRHNLHNTTQHYRHCQQFVRDQAFTKAHGDRDGIANILIVITDGESTYPTYTAEEANKLHNTDISVIVIGVGDANDDELNIIADNEASVFHVTNFDSLETIQDRLKSSTCREIPDTTPEPNTTNATANGTTPPSNISEIPDATPEPNTTNATANGTTPPSNISEIPDTTP
P_133	D_127		von Willebrand factor A-like (glycoprotein )	NPHNTTQHYRHNPHNTTQHYRHNLHNTTQHYRHCQQFVRDQAFTKAHGDRDGIANILIVLKGGESTYSALTAEEANKLHNTDISVIVIGVGDANDDELNIIADNEASVFHVTNFDSLETIQDRLKSSTVQRHLLISVVSRNPHNTTQHYRHCQWYNATFHQNPRNTTQHYRHCQWYNATFHQNPHNTTQHYRHCQWYN
P_134	D_128		Collagen alpha-4	NPHNTTQHYRHNPHNTTQHYRHNLHNTTQHYRHCQGCGTKPADIVFLLDTSGSVGVANFDKVKEFVKHYVTSFKIGPIDVNVGVVTFGSVARNAFWLNAYTSVSSLLEAIENITYIGSYTYTHLGLKFVRDQAFTKAHGDRDGIANILIVVTDGESYNPTYTAEEANKLHNTDISVIVIGVGDANDDELNIIADNEASVFHVTNFDSLETIQDRLKSSTVQRHLLISVVSRNPHNTTQHYRHCQWYNATFHQNPRNTTQHYRHCQWYNATFHQNPHNTTQHYRHCQWYN
P_135	D_129		GGNG-1 precursor	THTHTHTRVGERAFSRFFSACPVFVLKQLIWRLRLSLIFVFIYIKSLPKLFSVSSWGLLHNIMYIVLPASAQHTNFWNQPLDRKRGRNGTGCIPVCPVTVPIFRFLLYATCIESGRGGEMCCEGREPEFLFCLLCAEKCVGEWAIHACWGGNGKRSGPSTDLAPAPNSLRQLLLLRNRPVFAPGLDRGEGLALSGQSSDVDSSSSYNRDLSDYNVLPSRSRLAALLKTLRTLQRENRELPHQQKPMAPTCARRLRFVTPKTTKKNLPSSSAQVQQRDTRSAGLYLSDNVPLL
P_136	D_130		S	VVCVLGIHRFFFSGITISVLGRNLFRIVNNMVLAGLSKLIMRYSDSVGVYLSEDRLMTIISFCFFTMFKEFYGHACNGPSLTILKLLFSDNLPLDHCKAIPVQILCCQHLGHLRPVCCRVQNNMRSMLFICSLVSVRDNCCVCPEQLHSASVWPSRFQFTFTCVVVVLFFFLSVHIVVFSFPLHMASGQTDLSVVMYYSGASNQTYFLFEFCVILMLSFLMFATCDVTCQAGTECSYHINDASESTAQETLRFATSISWFTKQFHTLIYRNLTINAFIHNESGVCKRAQRRHSCLNRVLLEFSKRMHVKSEFTWFITKPINLQYLHILLFRRFSLILNKILLRSHEECGIDYMFYFSIHDQQLKAHFSVIQGTSRCLLLSIVNLFSFLFQPPRYPFSNV…
P_137			O2	FFLFCLFICSFLFLVCLFCFGFGFFVCLFFVCFFCKRAHKYVSNNVCTCSFIVISRQKRLCPDYTEPCSHAHECCSWNCHNGHCTGTRTTSHPTSPLSSSEASRLLFFWTIFTSKQIIRLALFSPLQNQWRK
P_138			O2	RMLVCGADVVHTNVLQIMRCKYAFFCFVCFCRAHKYVANNSLCTCFSIVIPRREGSCTSWLATCTHDQQCCTDVCYKRDYCALWDDRPQAIHHHSPLQRLQGFCFPFEESLRVNKADRVFFFPFEKSMMELKSLPFCLLQRTYHNISSIGDMCDSLTNDQVSRHVSR
P_139			O2	THTHTHTQVSEFDFAEKRPRENIRFLSKRKTNAERWREGSCTSWLATCTHDQQCCTDVCYKRDYCALWDDRPHAIHQHSPLQRLQGFCFPFESLRVNKVDYHVFFPCAKSIMEVKSIPFYLLQRIYRNIKK
P_140			O2	FAVYTPPADTPSPLSVSMTAAFSRPCPHFSADLKKTLIMEKLTILLLVAALLLSIQAVNQEKHQRAKINLLSKRKPPAERWDVYSFNAAVFPFIYQNTCLYFSSQYSFISMICFSCRAHHVANNLVCTCSSVVISRWRWGGCMAWFGRCTKDSECCSNSCDITRCELMRFPPDWHRHSPLQSLQGFCSLLKNFYETKKWTSTFPFPFAKSM
P_141			O2	IRCLHSACHAISSLSLPDSCLQSILPSSQRTLGKKCKTFIMEKLTILLLVAALLLSIQAVNQEKHQRAKINLLSKRKPPAERWDVYSFNAAVFPFIYQNTCLYFSSQSFISMMCFSCRAHHVANNLVCTCSSVVISRWRWGGCMAWFGKCSKDSECCSNSCDITRCELMRFPPDWHRHSPLQSLQGFCSLLKNFYETKKWTSTFPFPFAKSM
P_142	D_131		NA	ETTPGGESEKSDTVSPKVSPRPPAVITPELVTVVDGDNVTYICNASCTVNDKVSFKWFRNGAEISDAKEQKYTFVASLKDNINKFSCMAESTLGVESGKSDNVSPKVRPQPPTITPELVKVVDGENVTYTCNTSYTGNDKVSFKWFKNGDGIPDAKEQKYTFVSRNYLTLKDRNTPSSLLKTTKTSSLALKLLLVVNQRNRDNVSPKVRTRPPNVITSETVTVVDGDNVTYICNTSYICDDKVTFKWFKNGAELSDVKGQKYTFVSSLKDNKNKFSCLIIITPGGESEESDNVCLEVRPRPPTIIPEIVTVVDGDNVTYTCNTSYTVNDEVAFKWFKDGAGIPDAKEQTYTFISSLKDNKNKFSCLIIITPGGESEESDNVCLEVRPRPPTIIPEIVTV…
P_143	D_132	OK053_160	M	FLVLFPLATLQLDADKPVERYAENKQLLSPDERREIILHALGTRCCSWDVCDHPSCTCCG
P_144	D_062		M	LFPLATLQLDADAPQPVERYAENKQLLSPDERREIILHALGTRCCSWDVCDHPSCTCCG
P_145			Actin	DPLFRQRRHKGPAVGRLLFRLFLPPVFQELADYYSLTFNMCDDEVAALVVDNGSGMCKAGFAGDDAPRAVFPSIVGRPRHQGVMVGMGQKDSYVGDEAQSKRGILTLKYPIEHGIVTNWDDMEKIWHHTFYNELRVAPEEHPVLLTEAPLNPKANREKMTQIMFETFNSPAMYVAIQAVLSLYASGRTTGIVLDSGDGVTHTVPIYEGYALPHAIMRLDLAGRDLTDYLMKILTERGYSFTTTAEREIVRDIKEKLCYVALDFEQEMQTASTSSSLEKSYELPDGQVITIGNERFRCPEALFQPSFLGMESAGTHETTYNSIMKCDVDIRKDLYANTVLSGGSTMYPGIADRMQKEITALAPPTMKIKIIAPPERKYSVWIGGSILASLSTFQQMWISK…
P_146	D_135		NA	PGDRNCSHYGESCTVDADCCSGFCFKRKGYCSPWLTLTTSHPTSPLSSSETSRLLFSFEEFLRVNKKVDHVSISLCKINDGGKSPPFCPYQRTYHHNISFIGYMCDSLE
P_147	D_137	OK053_169	M	LTICLLLFSLNAVPLDGDQPAYQPAERLLDDISSENNPFYDPAKRCCMTCFGCTPCCG
P_148		OK053_173	M	LLFPLTALPLDGDQPADQAAERMQAEQHPLFDQKRRCCRFPCPDTCRHLCCG
P_149	D_157		M	DGDQPADRPAERMQDDISFEQHPMFDATRRCCNAGFCRFGCTPCCWMTSFVIAASSSV
P_150			M	FFSSGEWKKTTSPIELRGGGEGGGGTDLWIRKWLIKLMGARKVRQLGQAMREISPLLAQAFHACLFCCAAAVLLSSRKLASFVDGVAPSRLIHSSLFPCVRVDAKPFGCFKCHSVCSGHHRNAFLVTAHHRREPRPVVWHESYMICPKLRKHEDSVEARQACLVEHFCVWDFVLPFFFKQSCEAGRVEVIQLLGMPLVHCQRFTWVEGGGGLLCTTSASGEWDGAWLMTCTVMAIDEVVCKGISDRQLTFDGADGGIPGNKKWVRIKREREMLADVVCASLSLCLHGHTHRANTFTLTVQNQPVERYAENKQLLNPDERRGILLPALRKFCCDSNWCHISDCECCYGRRTSMALCWAVSSQQRQRLLISCIIAPTSLVERTLHSGSDFVFFSDNKQTSK…
P_151	D_139	OK053_175	M	QPVERYAENKQLLNPDERRGILLPALRQRVCCPFGGCHELCQCCEG
P_152			I1	RGTCSDRGQECKHDSDCCGHLCCAGITCQFTYIPCK
P_153	D_141		I1	HMHTQPRHSTCSITTSCQDNHTSSLSFSIPIHPCCSFTAFSFIGMLNRGMCSDIGQGCGQDSDCCGDMCCVVQRCVMTIITCTFLLSLLVRWTACWPSGRLAQNASVRVKRPDTIRRIRLPRASAMPRSSCTFTVAVSFHVHSHVKDEKK
P_154	D_142		NA	ARRVLFCDSFVHVFLGGSLTFKIYKIYATKLASHSFKQPLHLLSLKLLRLLKSVRYEAINVISRLYRPPFALTSCNFITSASQEIMLAIHLRDKKRISISPSPCNSAHQCLVHPSSDPSVHQSVDPSVHPPIHSFAAKLIFESLFLFVSGRLNKRCKEADEPCNIFSLDR
P_155			NA	KEGKGKKKGKKREKRQKRGGGGKTHTQKDSLTHKVNRWVHSTCFFCQTGAGINDVCKSWRDCPQGADCYVDVGLRCRWPSDHSCTANNQCSVDSCINGICKANIGGRCLSNKDCPEGATCKSQGWLNFEKKCETTRRPKQAHHIADSHWL
P_156	D_144		O1	ECNDGICHKVIHKSVMWQRYTECNDAMHSNVIVMMWCDRGNTQNVMVCDRVIHRLYGYGVRGNTRVIMCVEVMLEMLYDTRNANKCDVTQVMHHMCKASEIIFTLRCYIADALENLYLKARHEMENPEASKLNTRDDCEPPGNFCGMIKIGPPCCSGWCFFACANCRDVFYSPLCYLASLIGACPS
P_157			O1	GLGNLFSNAHHEMKNPEASKLNKTWCKQSGETCNLLDQNCCEGY
P_158	D_021	OK053_373	Conopressin / Conophysin	MGRLTLALCLLLLLLLTTQACFIRNCPSGGKRDVDERHPTKACMNCTFGQCVGPQVCCGAGGCEMGTAEANRCSEEDEDPIPCLVIGAHCSLNNPGNIHGNCVAHGICCVDDTCAIHFGCL
P_159	D_145		T	FNDNAKRILQILQDRSGCCVIDRNCCG
P_160	D_146		H	MRTSGKLLLLCLAVGLLLESQAHPNADAGDATRDVGSDRTSVELSKMLKRWQAEKGQRKASAPKDFYIFPPQSRSFY
P_161			H	MRTSGKLLLLCLAVGLLLESQAHPNADAGDATRDVGSDRTSVELSKMLKRWQAEKGQRKASARDEEGGFYIFDPNRRSFY
P_162	D_048	OK053_208	O1	MKLTCMMIIAVLFLTAWTFVTAVPDSSNALENLYLKAHHEMNNPEDSELNKRCYDGGTSCNTGNQCCSGWCIFVCL
P_163	D_056	OK053_263	O2	MGKLTILVLVAAALLSTQIMVQGDGDQPADRDAVPRDNIPGGTSEKFMNVLQRRECPWKPWCG
P_164		OK053_286	O2	RWGGCMAWFGKCSKDSECCSNSCDVTRCELYPFPSRY
P_165			A	MGMRMMFTVFLSVVLATTLVSSTSGRDKASHQKRDCPVTGGPNPYHHCMIACMADGTKEYCRCHYCKDCVDSNGDKPAC
P_166	D_094	OK053_355	T	MRCLPVFVILLLLIASAHSDTVPLKTKDDMPQASFHGNARRTLQMLSKKGCCSYFDVSCCLWP
P_167		OK053_291	O2	MQKLIILLLVAAVLMSTQALFQEKRTMKKIDFLSKGKADAEKQRKRNCSDDWQYCESPSDCCSWDCDVVCSG
P_168		OK053_295	O2	MEKLTILLLVAAVLMSTQALFQEKRTMKKIDFLSKGKADAEKQRKRNCSDDWQYCESPSDCCSWDCDVVCSG
P_169		OK053_307	P	MHLSLARSAVLMLLLLFALGNFVVVQSGQITRDVDNGQLTDNRRNLQSKWKPVSLFMSRRSCNNSCNVPSDCESHCICTFRECKIILI
P_170	D_138	OK053_178	M	LKMGVVLFIFLVLFPLATLQLDADQPVERYAENKQLLNPDERRGILLPALRKFCCDSNWCHISDCECCYG
P_172	D_106		J	MASVQSVTCCCFLWLMLSVQLVTPSPPGTAHLPRDGSDRDIPNVFVGILCYAFCTGGIELDDCDCSQILDLVSQISRKRSMAM
P_173	D_107	OK053_138	J	MTSVQSVTCCCFLWLMLSVQLVTPSSPGTAHLPRDGSDRESRDFFLDILCTFFCFDKLGFDFGGEFCDCSEVSDFGLLPDQ
P_174	D_114	OK053_399	PDI-A2	MKFATVFSLTLLALVACEEVEQEEKVYVLKTKNFDNFIKENEFVLVEFYAPWCGHCKKLAPEYSEAAGKLMDDGSNIKLAKVDATVEKDLAEKFEVKGFPTIKFFISGEPVDYTGGRQTSDIINWLKKKTSPPAKEVKTCEEAKTFIDSDEVIVMGFFKDQEGKGAAAFKKIAAEIDDVAFGITSEDNVFKEHKMKKDGVVLFKKFDEGRNDFSGDFEEAAMSKFIKDNYLPLINEFTQDTAQKLLSGDVKSYLMLFVKKEGAKDILDTFKAAAGEFKGKVLFIYLDTAIEENERVMEVFGLKAADTPAMCLIQLDEDLVKYKPESDSLDKSTITKFVQDFLDGKLKPHLKSQEVPEDWDAQPVKVLVSKNLKEVAMDKSKAVFVEFYAPWCGHCKELA…
P_175		OK053_361	T	MRCLPVFVILLLLIASTPSVDARAKTRDDMSLASFHDDAKRILQILSMKRCCSIHDNSCCGLG
	D_001		NA	KSSVGQIIGPDTENTLYQNGIVIKALGVGPPEDFTEFEHFQQEVIHILPTYDSLRALPSEMGSSLCDGCSLKADVLFLVSASTVAESMFRTNLASIKNV
	D_002	OK053_369	Conodipine	MKMLESALWILAALAMPWIAAQDYSTAELCRINSNDCSVPFSWIPCQQHFLAACDRHDTCYLCGAHFNFTQDDCDNAFLRDMTALCANGTDDEGFCLQKRKRRETSSMSITTPLRQPRLLEKLMPQTSLSHRDPRQLHRRVATCTEWALIYFNTVQFFGWWYFYDTADATYCPHFEACMPEV
	D_005	OK053_040	Tpra_06	MLSMLAWTLMTAMVVMNAKSQTTCPTSTNIDSCVNDNNACGKDVSGNCSSLCNCGNGQTCSTDSSHTITLVPYYTEDGPYEKKYYTCGDPSELDECYDIDKALEVNESDDPNSVEVLCHCPSDQIYLWIHLQYYICTPPPQPDI
	D_006		Immunoglobulin-like domain	PGGKSDISAQVSPTVRPQAPSVIPVDITVKEGTNITYTCNSSYSSLDQTKYTWFKNGPEIANANEPKYTFTSSLADNNDKFSCLVETTPGGESDKSNSVSPKVGPNKPSVTPEIVTVVDGEDIAYT
	D_017		PLAT/LH2 (membrane disrupting?)	MNGIIRPCILLFIVICAVAMVWSSGGDSKQGNKAFSVRSKTYDNPQERRKVLKRLRGISSLRRIQRARRQEMYTYKVCIEICETAGAGADGNVRLNIITTNGQSWDEPVTMVPNEDFESGGCYCFQFEKPKLTSVLQYSVRVGLEAEEHDEMKPYRFFVQVPGQISMCDFMEECDFWTDTCWLSVEEDRTVNTCYSVHWIPQC
	D_022		NA	MVKCLVLLFLGCLAFTTCFADLRIKLRPKWQSGCCVNFMAPCDVTSCPNYPTAECENIPCMCAAAFYYNGRLLADTECNSR
	D_024	OK053_028	U	MIRMGFFLTLTVAVLLTSLTCTEAVPTDKREMERLFDHVLLKGQRNCPYCVVYCCPPAYCQASGCRPP
	D_032		Hypotethical protein	LNQTAVDSSTPTEDLTRFCLNQTAVDSFTPTEDLTRFCLNQTAVGEEYSVTGGTSQRSKKTEAVPDRSIQSWAKTTAIEMTGTRHDHQFRHGLLLWLPLLALLSLSLPLGPARASGENQTTPVTREVTLSYLNRTLQAITNIMSFYQSQHAKVNLDGVIGMRVAQGTLKVLLENLEVRNQTGLLPEHLVVDMRSVHNFTKRVADMTEQDVAQNQKRYYGRLWPTIIDGQWELNYPTRTLNASLRTWDYDELEHMRENQSDDCVVELFGTGGNTTEPCFITDGCWINMTQMGYHRYSLTHEVFYLQLGELSGCMFDMLLKIENSNGSQPTLRFLQETFCLNILNEANYLANQSFPLNSQDLFMEQAGLCGLYGFWEFFRYSWLDNILSWQDKEAGCYKNK…
	D_041		Thioredoxin peroxidase 2	MAQIGQLAIQKPAPEFSTQAVVNGEFQTVKLSQYRGKYVVLFFYPLDFTFVCPTEIIAFSDRVEEFRSINCEVLGASTDSVFSHLAWVNTPRKQGGLGNMNIPLLADKTLEISRQYGCLKEDEGISYRALYIIDDKGNLRQITMNDLPVGRSVDETLRLVQAFQFTDKHGEVCPAGWKPGSDTIKPTVKDSKNYFTKAN
	D_045	OK053_210	O1	MKLTCMMIIAVLFLTAWTFATADDPRNGLGNLFSNAHHEMKNPEASKLNKRCKQADEPCSILSLDQCCSGVCFGICI
	D_047	OK053_213	O1	MKLTCMMIIAVLFLTAWTFATADDPRNGLGNLFSNAHHEMKNPEASKLNKRWCKQSGEMCNFTDQNCCDGYCILLFCT
	D_049	OK053_214	O1	MKLTCMMIVAVLFLTAWTLVMADDSNNGLANLFSKSRDEMEDPEAAKLEKKECQEKWDYCPIPFFGSRYCCYGLFCTLFFCA
	D_050		O1	MKLTCMMIVAVLFLTAWTLVMADDSNNGLANHFSKSRDEMEDPEAAKLEKKECQEKWDYCPIPFFGSRYCCYGLFCTLFFCA
	D_053		O2	MSLCAHDYIPARLKQMRRPTLAHHLADQPADRDAVPRDNKPGGTSGQFMTFLRQVRCRMTPLCR
	D_054	OK053_269	O2	MGKLTILFLVAAALLSTQIMVQGDGDQPADRDAVPRDNKPGGTSGQFMTFLRQVRCRMTPLCR
	D_055		O2	MGKLTILFLVAAALLSTQVMAQGDGDQPADRDAVPRDNKPGGTSGQFMTFLRQVRCRMTPLCR
	D_059		Immunoglobulin-like domain	ETTPGGESEKSDTVSPKVSPRPPAVITPELVTVVDGDNVTYICNASCTVNDKVSFKWFRNGAEISDAKEQKYTFVASLKDNINKFSCMAESTLGVESGKSDNVSPKVRPQPPTITPELVKVVDGENVTYTCNTSYTGNDKVSFKWFKNGDGIPDAKEQKYTFVSSLKDNKNKFSCMIETTPGGESEKSDNVSPKVRTRPPNVITSETVTVVDGDNVTYICNTSYICDDKVTFKWFKNGAELSDVKGQKYTFVSSLKDNKNKFSCLIIITPGGESEESDNVCLEVRPRPPTIIPEIVTVVDGDNNVSPKVRPQPPTVTPELVTVVDGENVTYTCNTSYTVNDKVSFKWFENGARIPDAKEQIYTFVSSLKDNKKFSCMIETA
	D_066	OK053_121	I2	MVRVTSVSCFLLVIVFLNLVVPTNACAGNEQSCNTREDCCEPLNCCNNACDFPCRIVGKRAKYREFFRQR
	D_070		Calreticulin-like	MKTFVFCLALYGVTFCDATKYFTEDFTENYEGRWVESTHKGSDQGKFKMALGKFYGDEKVSYGLQTSQDAHFYGISAKFDKFSNKGKDLIIQFTVKHEQNIDCGGGYVKLFSSDLDQSDMHGDTPYLIMFGPDICGPGTKKVHVIFNYKGKNLLTKKDIRCKDDVYTHVYTLIVRPDNTYEVRIDTEKVESGELEADWDFLPPKKIKDPEAKKPEDWDEREKIDDPDDTKPEDWDKPEHIPDPDAKKPDDWDDEMDGEWEPPMIDNPDYKGEWKPKQIDNPDYKGKWIHPEIDNPDYTPDDELYKYDDIGAIGFDLWQVKSGTIFDNVLITDSEDDAKQHAEETWEATKDKEKKMKEEQDEEDRKKREEEEKKRKEEEGSKQSDDDEEEEEEEEEEPAD…
	D_073		O1	DGLENLCSKAHHEMKNPEASKYRHGLNPFSLLHPLVWGIVPGTALAADSRTADP
	D_074		NA	DIDALLREAPRVASRRLTEANGPRGYYQSAEAQLRDSLLSEILRLDRRGGGSGLTTYDGSAMADKRGHRSYVDAGKTFGTLGGANMDWTEPQQEVFQRIRNELNRILSELEAILPSQTAE
	D_085		FK506-binding protein 2-like	CVRPCVVCSLYLGRFRHVEFSVHFIPRQPRAPVNLEEGSTSSHTTHTCTSFLLRMSSQSRSVAVFAVGLLVCSLGFPSRADDEGELVREVLLKPDSCDRLTKKHDLLSMHYTGTLTATGVKFDSSHDRNQPFEFQLGVGQVIRGWEEGLLDMCVGEKRKLVVPPNMAYGDQGAGEVIPPKASLTFEVELMGIKDGPPPPNVFKEIDANEDKLLSQDEVSSYLKDQQKRADPSTPPVNDDQHNTMLKQIFDHEDKDKDGFISHDEFSGPKHDEL
	D_086	OK053_376	Conorfamide	MSGRGFLLLALLLLVTVEATKVEKKHSGILLAWSGPRNRFVRFGRRDMQSPLLSERLRF
	D_087		NA	MLFRLVFAVGLLTAISCSPQQGSQHQSASHSLTNLEADFWDWRMRDAPLFSTAVGETRYNGELESYTLSVYDGRKRAVEGYLDHLRGISKGHLNDSQQLDYDIFTDYLQTYLDGARWNNYFAVNAVNFLEGINADAGRLQTVLPFSTVEDFQNYLSRLTKLPAQIEEKMELLRTAVSTGRTLNNVSVLVVPVQIDRLVHQNVEDSEFYHPAFTSVLDASNIPTGQRAALRSEGREAVRLITLALRRLKSYLQQSYLPATRPTWGLAALSDGREMYQQCLKYHTSTTMTAREVHDLGLREVARIRANMEAALQRLQFGGTIKQFYDGLRTDPQFHHNSSQALLDNYHDFIFNRIMPKIRTVFKDIPDLPLRIEPMPYDGPGGIYLAGTPDGSVPGIFYAN…
	D_092		FK506-binding protein 2-like	MVSRRNAVKTSVLLLLCSLGGVSRADETEEELINEVIFKPETCDRLSKAHDMLSMHYTGTLTATGVKFDSSHDRNQPFEFQLGVGQVIQGWEKGLLDMCVGEKRKLIIPSHLGYGDQGAGEMIPPKSSLTFEVELLNIKDGTPPQNIFKEIDTNEDKLLSKEEISGFLKEQAQKAGPGSGLTDEHHEKIITEIFEHEDKDKDGFISHKEFSGPKHDEL
	D_098		Galactose-binding-like	MLTLTILVLSSVFAEARGGENPNLIQNPSFESPIGDAWTGIACSLEEYSEDKTNGKVSAICKDRKKHQAGVEQLLPILIPGRGYELSADVRLLNDHPDKLFQRFKATVKFLFNETAIRGVDSRKPELSGEEEEEGTFIFAWRAWATTHKGWIKLKGSINAPMVVWWSVLLFVVCVCVCPGRNIRRALNSSFPF
	D_099		Galactose-binding-like	MLTLTILVLSSVFAEARGGENPNLIQNPSFESPIGDAWTGIACSLEEYSEDKTNGKVSAICKDRKKHQAGVEQFLPILIPGRGYELSADVKLLNDHPDKLFQRFKATVKFLFNETAIRGVDSRKPELSGEEEEEGTFIFAWRAWATTHKGWIKLKGSINAPMVAFNVSLLRIQGPDPECNFLIDNVSLVEIDENPDWLAESRVRIDTHRKSDIELKVHIPDDVPKAEVDVQVRLKKHLFAFGSKVEDKFLRGSKKLDKKFQELFYTLFNWATLGSFKWKFDKGKSLNEPDFSEALGGLEKLREHGFPSHSNPRAWIRAER
	D_108	OK053_135	J	MASVQSVTCCCFLWLMLSVQLVTPSPPGTAHLPRDTRDVPEIVLELMCPMLCPNGFGGEYCTCTKKRDMVSSRISRKRSMAM
	D_110		NA	MGMRMMFTMFLVVVLPTTVVSLTRRAGIDESCRSWKECPQGADCYRMGSGNRCRWPSGHSCTANNHCSVNSCINQKCGANIDGVCLSNKDCPQGATCKSEPYAWFNSEKKCLL
	D_113	OK053_403	PDI-A2	PAKEVKTCEEAKTFIDSDEVIVMGFFKDQESKGAAAFKKIAVKIKDVSFGITSEDRVFKEHKMKKDGVVLFKKFDEGRNDFSGDFEEAAMSKFIKDNRLPLINEFTQETARKLFTGDVQTHLMLFVKKEGAKDILDTFKAAAGEFKGKVLFIYLDTTKEENEHIMGFFGLKAADAPAMRLIQLGEGLVKYKPESDSLDKSTITKFVQDFLDGKLKPHLKSQEVPEDWDAQPVKVLVSKNLKEVAMDKSKAVFVEFYAPWCGHCKELAPIWDQLGEKFKDSKDIIIAKMDATANEQEEIKIKSYPTFKYFPKGSDEIIEYDGERTLKELIKFVESGGKQEPPKKEEEEKEEDDDKKKDEL
	D_117		NA	THTHTHTHTHTHTHARAGLFQIPPPPPPLLPTQPSPPSLPSVSQSVAVFVCVCSCPAEYEGSRCEQLSSYYYDNYYQRITRIG
	D_123		NA	GQATLRSPGAHGKWLFLPLVVSLLLTMDCPTVQSSRFAPNAKNRKTAAAEISPSHLSPKHLNFLLNSLKLTPTANSKRPLWINPFLWSPHHHFFNHVLTSHRKTPAWFSKLFWSPDELNVIWQALELTQTANKPTPGEKPTTEKPTVEDNKLPGSGNQTDKHSDVVYQVTHSMN
	D_124	OK053_027	U	RLFDHVLLKGQRNCPYCVVYCCPPSFCQSSGCHPPI
	D_134		H	QTDRQTDRDREVRLYAMHILCDLIGRVEMDCGGVPCKFGCCIEDRCREIGCDPDPQRLLDDEGHCPAATESSSVVDPQLQRIQTDQHTTKPCTATSVFCPHISINTRGAHWHRIAERILLVVVVVAVVVEIVVVAVVVVCGSTGSSSSSSSTSGICCSSSSINRFNSSNSGRSNSSTGSSSSSSSSNRSNSSTTNNSSRQATSFRFSLRSQSEHLFKKK
	D_136		NA	HTHARTHTHTRTHTLSSVHFSTFSRTHQMMAAIKIILRAVLEEEEEKKGAENEHRESRKQHRRQSWAVMENGGDLGMWIGKMKLEFKKKLLLCSGISSKLLCYGPHCGSVSQWHHNARVPILQASLSWFSHSLFAAASFTPFCQFQRRNGSTMYGSRRNYINGRTHGFLVSRRQIAPTVSYESRMEKAAISETSKVCQFSHKHRRILSNQSLHRKGSTEVGIEGWGGGGGGGGSACSRDNCSFRPHHSKLLGKSLYLSLADDPSNDPLKDLNEELQLRVAPPSPAISPDDIDALLREAPRVASRRLTEANGPRGYYQSAEAQLRDSLLSEILRLDRRGGGSGLTTYDGSAMADKRGHRSFGILGGGNVDWTEPEQEVFQRILNELNSILSELEAILPSQ…
	D_140		I1	HMHTQPRHSTCSITTSCQDNHTSSLSFSIPIHPCCSFTAFSFIGMLNRGTCSDRGQECKHDSDCCGHLCCAGITCQFTYIPCKFPYCDGPRRAGLAVDSLSMPDLSENDLTSVVFVCQEPARPCLGPHAHSQLLVDFTCIKAIRCRKMKKK
	D_143		NA	SLSLSLSAHVYMHACTHTYKLMAFETKVQTDTSYLCRKHEQNPWSEHIKSIFCRFHHEHLCPRSVCRLKGFFVTGWPSGHSCTANNHCSVNSCINQKCGANIDGVCLSNKDCPQGATCKSEPYAWFNSEKKCLLTRRPKQAHHIADSHWL
	D_147		O2	MGKLTILVLVAAALLSTQIMVQGDGDQPADRDAVPRDDNPGGPSEKFMNVLSGRECPWQRWCR
	D_153	OK053_124	I2	MVRVTSVSCFLLVIVSLNLVVLTNACIPEGSPCSTGNSCCHKSCCRWTCNLPCLIPGKRAKLLEFFRQR
	D_154	OK053_105	H	MNTAGRLLLLCLALSLVFESLGIPVADDVEADRDTDPDEKDPSVHNSLKDVYGDCGGELCKFGCCKTDDGERKCQHFGCR
	D_156		M	MMSKLGVLLIICLLLFPLTAVPLDGDQPADRPAERMQDDISSEHHPMFDAIRGCCPPLACSMGCDPCCG
	D_158	OK053_251	O2	KENIKFLLKRKRAADRGMWGKCKDGLTKCLAPSECCSGNCEQNCKMW
	D_159	OK053_401	PDI-A2	VKKEGAKDILDTFKAAAGEFKGKVLFIYLDTAIEKNKRFMEVFGLKAADTPAMRLIQLGEGLVKYKPESDSLDKSTITKFVQDFLDGKLKPDLKSEEVPENWDAQPVKVLVSKNFKEVAMDKSKAVFVEFYAPWCGHCKELAPIWDQLGEKFKDSKDVIIAKMDATANELEDLQIKSFPTLQYFPKGSDEIIEYDGERTLKELIKFVESGGKQEPPKKEEEEKEEDDDKKKDEL
		OK053_002	A	MGMRMMFIMFLFVVLATTVVSFTSDRASDDRNAAPNGKACDLIALIVRG
		OK053_003	A	MGMRMMFIVFLLVVFASSVTLDHAYHDRYAAVVDRASALLAQAVLRGCCSNPPCALNNPDCR
		OK053_004	A	MGMRMMFIMFLFVVLATTVVSLTLDRASDDTDVAAEIMSGLIALAIDSCCSDSDCNANHPDMCS
		OK053_005	A	MRMMFIMFLFVVLATTVVSFTSDRVSDGRSAAANDKAPDLISQTVRDDCCHNAPCRFNNPDICG
		OK053_006	A	MGMRMMFIMFLFVVLATTVVSFTSDRASDGRNAAANVKAPDLIALTVRNDCCHNAPCRNNHPGICG
		OK053_007	A	MGVRMMFIMFVFVVLATTVVSFTSDRASDGRNAAANVKAPDLIALTVRNDCCHNAPCRNNHPGICG
		OK053_010	A	MGMRIMFTVFLLVVLATTVVSFTSDRAFRGRNAAAKASGLVGLTDKRQECCSYPACNLDHPELCG
		OK053_014	B1	MQLYTHLYLLVPLVTFYLILGTGTLGDGGALTERRSADVTALKPEPVLLQKSAARSTSDNGKDRLTQMRRIFIKRGNTARGYEDDAEDVEYIGDLEEL
		OK053_015	B1	MQLYTHLYLLVPLVTFYLILGTGTLGDGGALTERRSADATALKPEPILLQKSAARSTDDNGKDTLTQMKRTLKKRGNVATDREEILETIRELNESGKR
		OK053_017	B1	MQLYTHLYLLVPLVTFYLILGTGTLGDGGALTERRSADATALKPEPVLLQKSAARSTDDNGKDRLTQMRRIFIKRGNTARGYEEDREVAETVRELDEHGKR
		OK053_018	B2	MLRLIIAAVLASACLAYPQRRDGAPANAAPNLQPFNGEMAMPNMQPMHALPMSMSGMSSPQLMPLNPNLGMGFKRENLEKRRQHSQFSDDNKSPFDSEDGLGNFMNFMKENGNNLPFANMDSAATDLGHFEPSAENEDGKFRFFDKEQ
		OK053_019	B2	MLRLIIAAVLASACLAFPQRRDGAPANVDPNLQPFGGVIPNMQPMQGMTGMPSPQFLPFNPNFAVGLKRENLEKRRHNPQFSDNNQSPFGSEGDLDSFMNFMKENGNNLPFADVNSAATDLGHFEPSDENEAGKFRFFDKEQ
		OK053_020	B2	MLRLIIAAVLASACLAYPQRRDGAPAEATNLQGFGPGMMQPMPDMQGMQPMQPMQPMPAGQFLPFNPNYFAGYKRAADENPEKRRLPSKFNEDKSSFEPEGGLGDFMNFMKETGNSLPFANIEGPAAGLGNFETSAENSQEDGKFRFFDKEQ
		OK053_021	B2	MLRLITAAVLVSACLAYPQKKEDAPPDTANLQGFGQPMPAMPNMQGMQMPGMQMPGMPMQNPFLPFGMGFKRDLDEDLEKRKHHSKFNEGNNSPFGSEADPESFMNFMKGNGDNFPFANMDSADTADLGNFQPSENEDGKFRFFDKEQ
		OK053_022	B2	KRHHSQCNEDNISPFNTEEGLGNFMKFMDNGNNLPFANMDSDDLGLDSFQPSAENEEGKFRFFDGQL
		OK053_023	B2	MLRLIIAAVLVCACLAYPQKRDGAPADAANLQGFDQGMMAMPNMQPMQPMPMMGMQGQFMPFNPGFGAMGYKRDLDEDLEQKRHHSQFNEDNISPFNTEEGLGNFMNFMDNGNNLPFANVDSDDLGLDSFQPSAENEEGKFRFFDGQQ
		OK053_025	C	MQTAYWVVMMMMMVWITAPLSEGGKLNDVIRGLVPDDLTLQRMFKSLFSHRLSGGTYSRVDTCIWKVCPQSP
		OK053_026	Cerm_02	MRFLLLLCIVVLLTPFRETEARLPEKSFRQRQAHPFQRIQRCPWCGMSCCSPNYCQGVTCTIVG
		OK053_029	Cerm_03	MKMSATLIVLLVLGLSFTDGALHRTINGRGASGPHNRDAMGQLIPRGKCGDRCPSGICNVDGTCRD
		OK053_032	Cerm_08	MKLFIFAAIIVAMATAEQCPNNRAVCAWQDQEGVNCDCIGTSCTKDSAHSINAAGSTLYTCQEISAFRECVGSEAALNSDFSQMNCRCASGVYTISGTAVVCG
		OK053_035	Cerm_10	MKFSTFVMVLMAAVLLTGILETEARRSFTARLKAKRFDQDDYLERVEEICEGTNRDCRGQPDGTTCCRNSHCSQGVCYLNF
		OK053_036	Cerm_11	MEFCRVVAVALIVTLVMTIDSVPADQTETGRVSLREDDRFPCASDQCACLPEEGSTTSWVCQSIQASRDDCVNDECITEDEWGGRR
		OK053_037	Cerm_11	MEFRRLVTVALLLALVLSIDSMPADQTETGRVSLREGNEFPCNSDQCACLPKEGSSTSYQCQSTSASTDDCFNDECITEDEW
		OK053_041	Tpra_06	MLSMLAWTLMTAMVVMNAHGQFCPTMTDSRPGENKCLHDNYLCGKEDDSGSCTSLCYCKSGQMCFRDNDHTITAVPRIINDRPVEITYYTCVALSSLNECSGIQEALKVLSPEAEEGESSVEVLCRCPSPK
		OK053_042	Con-ikot-ikot	MAMNMWMTISVCVVVVMATTVVGSTPLQERGLSLDERRAIGCCAWQVYDCLVQRGHYWYICYSWASWICTRGLSDRCCPGLERCIRRCVSGYRNVCYYHCIFESC
		OK053_043	Con-ikot-ikot	MAMNMWMTISVCVVVVMATTVVGSTPSQEQGLSLDKRRNVGCCAWEVYDCLIQRRSHFYICYSWASWICTRDLSDGCCPRLGRCIRRCVWGDRDLCYYHCIVARC
		OK053_048	Conkunitzin	MATFNIVLAALFASVILVDFAVQARRCHPPCEYGERCVSANRRERRHRHNNVCVPVRCLFQARRGRCLNFDRRYHFNTLTMSCTRVHTGACYGRNNRFSSSENCELTCAPRR
		OK053_074	Aboa_01	MTMYMKTMFGGFVLVVLVITVVGTSGHRGEFPNNLIHCRLPEFRFCLIRCWIEEERNCYSNCTFEIGKNLGIHTHGFDCTVFKVCYYRCYLFGRPEAHCWNKAAETVTGEVAELDVC
		OK053_077	Rmil_02	MRFYLLLTVTLLLTLSTGGDAGPRRANGLPKHFVLRTCTGNCRLCGAICCCEPKVCRNNQCIDDK
		OK053_078	Rmil_02	MEFRRLVTVALLLALVLSIDAEPMQGMEAEGHFVRRDCGEGCGTCGGGCCCIPDSCVDSQCQSHVGPN
		OK053_080	Pmag_02	MKAVAVFLVVALAVAYGQFFCPDSENDPLNCVETMGTLATCMKSKSGKSYSYACGYCGKKKESCFGDKVPVDGYDCQVRNIANPCGGSAL
		OK053_083	Pmag_02	MKTVAVFLVVALAVAYGQFFCPDSEDDPLNCLETQATSATCMKSTEDETYSYVCGYCGKKKESCFGKKVPTSDYNCQIHKIPNHCGGPVM
		OK053_084	Rimp_01	MARLLSMLLCIAVAVVLAAGIQYSAESPMQQCSTHAVSKMEVYSNNQGKYELLDSYCSCDSGEAYFEAQDTTTSSSTVSSYKIYVCGMPTESCTGGTLPVTDSDNGPRRMQCTCGQYKYFISASLGWHVRCK
		OK053_087	CAP-superfamily	WAMQCILNHDGFANRAEPDLPGYVGQNVGWSSYHMTFPDVVDLWAAEIEDYEYGVWTNITGHYIQQIYAEASRIGCGQSACGEDRYFVCNYYKSTMGNTPYAQGSRCGQCPNSCWEELCDCTSGPDACCNGGSLNIDTCECQCPRLWSGADCQEKQCPDHDYEDMCDYPDVVNNPEYWCQFSNIRSDCPIRCGDCP
		OK053_089	E	MMTRVFFAMFFLMALTEGWPRLYDSDCVRGRNMHITCFKDQTCGLTVKRNGRLNCSLTCSCRRGESCLHGEYIDWDSRGLKVHICPKPWF
		OK053_094	F	MQRGAVLLVVVAFLALWSQAAAEEYDLNDPDVLAIVDEGQKLMHACSIANKYTYDPWWKLNILAFKEMRVYHSMMSDMVTCLNHFSRRRHEEH
		OK053_095	F	MQRGAVLLVVVAFLALWSQAAADVYDLMDPDVLAMIDVGKKMMHACSIANKHIDDPWWMLDVLDFKEKSVYYTMMSDLVTCLNHFFRIRFEEP
		OK053_096	F	MQRGAVLLGVVAFLGLLPQAAAKVYNLHETEVWAVVAYSKRLMNACAIANSLMDDLWLVVDDKELEERS
		OK053_097	H	MRTSGRLLLLCLAVGLLLESQAHPIADAGDANRDVGSDRTSVELSKMLEGWQAEKGQRKATARKPVYVYPPGGRSFY
		OK053_099	H	ADAGDATRDVGSDRTSVKLSKMLKRWQAEKGQRKASAHDEEGAFYIFDPNRRSFY
		OK053_102	H	ADAGDATRDVGSDRTSVKLSKMLKRWQAEKGQRKATARGKKNFYVVPPAGSRSFY
		OK053_107	H	MRTSSQLLFLCVSMGLVFALLGHPIADVRDAAGGADSEERSMQGSQTVEEKEASSS
		OK053_110	I1	MKLCVTFLLILVILPSVTGEESSERTLSGDTLTGDRRTCSDRGHACVHESDCCAQLCCMDKKCALTMPPCNYY
		OK053_114	I1	MKLCVTFLLLLVILPTVTGEKSSERTLSGAKGDRRRCVTVGERCEQFSNCCGGMCCLSHVCVITAIPCAF
		OK053_119	I1	MKLCVTFLLILVILPSMTGEKSSKHTLSGAILRGNRERCLHRGEQCRRANACCMNMCCHDLKCESMPGECPPF
		OK053_120	I2	MMCRLTSLCCLLVIVFLNSAAGGIPCVGSGGVCSSHVWCCDSLDVCCELPGPSMCTPEAACESVGSALGRRAQYTRFFRR
		OK053_122	I2	MVRVTSVSCFLLVIVSLNLVVLTNACAPPGSSCNHTDNKCCISACCSGACVLPCRRPGKRAKLLEFFRQR
		OK053_123	I2	MVRVTSVSCFLLVIVFLNLIVPTTTNDCIPEGSHCGVSSSCCKSTCCMETCQDPCRYTWKRAKLQELFRQR
		OK053_125	I2	MMFRLTSVSCFLLVIVLLNLVVLTDACGAAGLPCPLNDPCCADMDCCGDVCLLNCEKRGRRQVPLKLFGQR
		OK053_126	I2	MFRVTSVSCFLLVIVLLNLAALTDACHPEGTPCTNDEQCCLMECCFWSCSSNCEKRGRRQALMALFGQR
		OK053_127	I2	MFRVTSVSCFLLVIVLLNLAALTDACHLEGALCENDADCCLLECCLWRCASNCEKRGRRQALMALFGQR
		OK053_128	I3	MKLFWAIVVILMLLPLRTGVETSDNHASRSATALRDRLLRPKRCYGSLHECENTDECCTGYCCVKAGYC
		OK053_131	I4	GHTSVSFLLLSIVALGMVATVICSCNPYISSETCEHPEENCSCPNTSCCELYPRKNQCMSEEMCYIARLPPGSRGLTRMQKRFLRMPRHLAD
		OK053_140	Cerm_03	MKLTVMFIVFLMLTMPMASAEISRRTIDGGEAGVLAGDRATNKNALLQQRLCPTSCSSCSNC
		OK053_141	Cerm_03	MKLSVMFIVFLMLTMPMTCAGISRSATNGGEADVRAHDKAANLMALLQERMCPPLCKPSCTNCG
		OK053_142	Cerm_03	MQPSVMLVVLLMLTMPFINGLMPRTATRRKDVAPNDRHAVDSQKLKRFCPNPCQSCPSPGECVRPYTGHTFFLHLR
		OK053_143	Cerm_03	MQPSVMLVVLLMLTMPFINGLMPRTATRRKDVAPNDRHAVDSQKLKRFCPNPCQSCPSPGECVLPNSYAFILRLR
		OK053_144	Cerm_03	MHLSVMLVVLLLTMPLFNGFVHNTIAGRKTVVPKDDSAEYPKIRRCPTTCTSCNPPGTCQT
		OK053_151	M	LQLDADQPVERDAENKQDLNADERMTLLLEDGCCTRPRCTGACSCCQD
		OK053_153	M	LQLDADQPVERDAENKQDLNADERMTLLLYALGEDGCCTRPRCTGACSCCQD
		OK053_154	M	MMLKLRVVLFILLVLFPLTTLQLDADQPVERYVENKENLNPDERREIILPALR
		OK053_155	M	MMLKMGVVLFVFLVLFPLATLQLNADQHVKRYAENKQDLHPNERTGFILPAMRRRCCSLRRCEPHCHCCVQRH
		OK053_162	M	MSKLGVVLCIFLVLFPMATLQLDGDQTADRHADQRGQDLTEQQRNSKRVLKKRDWEYHAHPKPNSFWTLV
		OK053_163	M	MSKLGVVLCIFLVLFPMATLQMDADQTADRHADERDQDLADQYRNLMRVLKRGWTHHVKVEPNSFWSLV
		OK053_172	M	ICLLLFSLNAVPLDGDQPADQPAERLQDNISSKHHPIFDAVRGCCHPSTCHMRKGCSRCCS
		OK053_185	N	MMSTLKMLLLTLLLLLPLATFDSDGQAIPGGGIPSAVNSRVRGDEKSGRSLEKRCSSGKTCGSVGPVLCCPRSDC
		OK053_187	N	MSTLKMMLLILLLLLPMATFDSDGQAIPGGGIPSAVNSRVRGDEKSGRSLEKRCSSGKTCGSVGPVLCCPRSDC
		OK053_188	N	MSTLKMLLLTLLLLLPLATFDSDGQAIPGSGIPGAVSSRVRRLLGGDKKSGRSLEKRCSSGKTCGNMGLVVCCPRSDCYCSVVNNGNFRKPVCVCP
		OK053_190	O1	MKLTCMMIVAVLFLTAWTFATADDPRNGLGNLFSNAHHEMKNPEASKLNKRWCKQSGEMCNFTDQNCCDGYCILLFCT
		OK053_191	O1	MKLTCMMIVAVLFLTAWTFATADDSSNGLENLFSKAHHEMKNPEASKLNKRCVDQ
		OK053_192	O1	MKLTCMMLVAVLFLTAWTFVTANVSRNGLENLFPEERHEMMNPEAAKLNNRDCVKAGTACGFPKPEPACCSSWCIFVCT
		OK053_194	O1	MKMTYILIVAVLFLTAWTSVTAGDFKNKLKNLSLKARKEVENPKASKLHQKACVNRGDPCQRTVRCCSRRCGVNSCA
		OK053_195	O1	MKMTYILIVAVLFLTAWTSVTAGDFKNKLKNLSLKARKEVENPKASKLHQKGCVQTGGSCPSTTGCCNGLCNVDKCT
		OK053_198	O1	KMKNPKASKLNKRCRLGAESCEVFSQNCCQGTCVFICLP
		OK053_201	O1	LFLTAWTFVTADHSKYGVENLFSEARDEMMNPEASKLDNKRGCIAHGKACVLPIITNALCCTGFCLFVCV
		OK053_203	O1	MKVSSVLIVAMLTLTAGQLVSASSHYSKDVQILPSVRSADEVENSENVRLSKRRCVEQGEVCGLILFSSSCCGQLCLFGFCIL
		OK053_207	O1	MKLTCMMIIAVLFLTAWTFATADDSSNGLENLSSKAHHKMKNPKASKLNKR
		OK053_212	O1	WTCATADDSGNGLENLFSNAHHEMKNPEASKLNKRCKQADEPCSILSLDQCCSGVCFGICI
		OK053_215	O1	MKLTCMMIVAVLFLTAWTLVMADDSNNGLANLFSKSRDEMEDPEASKLEKRDCHERWDWCPASLLGVIYCCEGLICFIAFCI
		OK053_216	O1	MKLTCMMIVAVLFLTAWTLVMADDSNNGLANHFLKSRDEMEDPEASKLEKRACSKKWEYCIVPILGFVYCCPGLICGPFVCV
		OK053_217	O1	MKLTCMMIVAVLFLTAWTLVMADDSNNGLANHFLKSRDEMEDPEASKLEKRACSKKWEYCIVPIIGFIYCCPGLICGPFVCV
		OK053_218	O1	MKLTCMMIVAVLFLTAWTLVMADDSNNGLANLFSKSRDEMEDTEASKLEKRDCHERWDWCPASLLGVIYCCEGLICFIAFCI
		OK053_222	O1	MKLTCVLIITVLFLTASQLITAHYSSDKRQYRAARLRDEMRNFKDARACGKEGERCLIRPCCPDLTCSGIIGGKCES
		OK053_223	O1	MKLTCVLIISVLFLTASQLITADFSRDKRQYRAARLRDEMRNFKGARDCGEQGQGCYTRPCCPNLVCRGGGTGGGVCQP
		OK053_225	O1	MKLTCVVIVAVLLLTTCHLITADDSRSTQKHRALRSETKLSMSTRCKGKGASCLRTAYDCCTGSCNRGRCG
		OK053_226	O1	MKLTCVVIVAVLFLTACQLITADDSRSTQKHRALRSTIKHSMLTRYCTPHGGHCGYHNDCCSHQCNINRNKCE
		OK053_227	O1	MKLTRVLIIAVLFLTACQLITSDYPRDEYRAVTSRFGVRNSKGSRECRESGQGCTRTAPCCPGLNCYGTRAGGRCS
		OK053_228	O1	MKLTCVLIIAVLFLTACQLTTAETYSRGRQKHRARRSTDKNSKWTRECTDSGGACNSHDQCCNEFCSTATRTCI
		OK053_229	O1	MKLTCVMIVAVLFLTACQLTTAEISSRGKQKHRVLRSADKNPKWTRECTRPGGACYYDSHCCRHVCHEVFNTCM
		OK053_231	O1	LTCMMIVAVLFLTAWTFVTAITRNGLENLFPKAHHEMKNPEASKLNKRCVPYEGPCNWLTQNCCDATCVVFWCL
		OK053_241	O1	MIVAVLFLTAWTFVTAVPHSSYVLENLYLKALHETENHEASKLNVRDDECEPPGDFCGFFKIGPPCCSGWCFLWCA
		OK053_252	O2	MQKLTILLLVAAVLMSIQALNQGDGVKSPREKINFLSKRKTTAESWWEGECSGWSVYCTSDAECCSGECGNHYCELF
		OK053_256	O2	ILLLVAAVLMSTQALIQSGAEKRPWENIRFLSKRQASWEVWWEGNCIEWLASCSTDEQCCSGACDAYCTLW
		OK053_257	O2	MQKLTILLLVAAVLILTQALIQGGGEKRLKEKIKFLSKRKTTAESWWEGECLGWSNGCTSPADCCSNSCDHYCEL
		OK053_261	O2	MQKLTILLLVAAVLMSIQALNQRGGVKRPREMIKYLSKRKTALESWWENECSGWSVYCTKHSECCSDECIGYYCDLW
		OK053_267	O2	MGKLTILVLVAAILLSTQVTVQGDRDQPADRNAVPRDDNPGRATRKFMKVLQGRGSECPWKPWCG
		OK053_268	O2	MGKLTILFLVAAALLSTQVMAQGDGDQPADRDAVPRDDNPAGTIEKFMNLLRQVRCQWTPACG
		OK053_271	O2	LIQEQRQKAKINLFSKREPSAERRQGGKRCIVLGSCTAHAECCSDFCALSECVSLY
		OK053_275	O2	MEKLTILLLVAAVLMSTQALNQEQQQRAKINLLSKRKPPAERWWECSIWFSRCTKDSECCSNSCDKTYCELMPFPPDW
		OK053_278	O2	MEKPTILLLVAAVLMSTQALIEEQRQKAKINLFSKRKPSSERRYSGCKLWGPCTVDAECCSGCGEISCSLLR
		OK053_279	O2	MEKPTILLLVAAVLMSTQALLQEQRQKAKINLFSKREPSAERRRGDKGCIEWGPCTAHAECCSAYCGETECIFLL
		OK053_281	O2	MEKPTILLLVAAVLMSTQTLIQGGGEKRPKEKINFLSKRKTAAESRWEEECSPW
		OK053_282	O2	MEKPTILLLVAAVLMSTQALIQEQRQKAKINLFSKREPSAERRRGDKGCIEWGPCTAHAECCSAYCGETECIFLL
		OK053_284	O2	MENLTILLLVAAVLTSTQALIQGRGERQKAEINFLSKRKSTFWRWWDGDCRTWNAPCNPGVECCTDVCRHGRCVWW
		OK053_285	O2	MEKLTILLLVAAVLMSTQALIQDQRQRAKINLFSKRQPYARDWWEDDGCSVWGPCTVNAECCSGDCHETCIFGWEL
		OK053_288	O2	LKRKSAADRGMWGECKDGLTTCRAPSECCSEDCEGSCAMW
		OK053_289	O2	MEKLTILLLVAAVLMSTQALIQEQRQKAEINLFSKRKPSAERWWVDSECNSFWGSCTVDADCCFNSCDETYGYCWPSF
		OK053_292	O2	MEKLTILLLVAAILMSTQALVERAGENRSKENIKFLLKRKRAADRGMW
		OK053_293	O2	MEKLTILLLLAAVLMSTQALIQGGVEKSPKEKIRGFSEIWYTIWRWYHGKCKGWSNGCVRHSECCSYNCKGMYCDI
		OK053_296	O2	MEKLTILLLVAAVLMSTQALVERAGENRSKENIKFLLKRKRAADRGMWGDCKDGLTTCFAPSECCSEDCEGSCTMW
		OK053_297	O2	MEKLTILLLVAAVLLSTQALNQEKRPKEMINFLSKGKTNAERRKRQCEDVWMPCTSNWECCSLDCEMYCTQIG
		OK053_298	O2	MEKLTILLLVAAVLLSTQVLVQGDEENPLKPMIYFILTGRAIPGNTPKSCDQTGEPCVLNEQCCYGWCTNYGTCY
		OK053_299	O2	VAAVLMSTQTLIQGGGEKRPKEKINILSKRKIPAKRGRNDYCTEWLLPCRRDSECCSNFCLEYSCML
		OK053_300	O3	MSGLGIMVLTLLLLVSMATSHTDRGVGLLMPRDGLQERTCTSDDDCGDLQCCPDTVDKPEGRCDSDCTIY
		OK053_301	O3	MSGLGIMLLALLLLVSLETSLQGGGEGQTMHRGKYKQGRRRILLRRALQKLRTPPQGTKKSASLDFLVPAVFA
		OK053_304	P	MHLSLARSAVLMLLLLFALGNFVGVQPEQITRDVDNGQLTDNRRNLQSEWKPVSLFMSRRSCHKPCQNHYECASHCICLIGECNDAG
		OK053_305	P	LLLLYALGNFVGVQPEQITRDVDNGQLTDNRRNLQSEWKPVSLFKSLYKRLPRFESCEQDSDCDFLYFCWNNECHKIFLI
		OK053_306	P	MHLSLARSAVLMLLLLFALGNFVVVQSGQITRDVDNGQLTDNRRNLQSKWKPVSLFKSLYKRLPRFESCEQDSDCDFLYFCWNNECHLLGFQRLWSQP
		OK053_308	P	MHLSLARSAVLMLLLLFALGNFVVVQSGQITRDVDNGQLTDNRRNLQSKWKPVSLFKSLYKRLPRFESCEQDSDCDFLYFCWNNECHVSRGDKGVAHTAA
		OK053_310	P	MHLSLARSAVLMLLLLFALGNFVVVQSGQITRDVDNGQLTDNRRNLQSEWKPVSLFMSRRSCHKPCQNHYECASHCICLIDTCNDAG
		OK053_311	P	LLLLYALGNFVGVQPEQITRDVDNGQLTDNRRNLQSEWKPVSLFMSRRSCHKPCQNHYECASHCICLIDTCNDAG
		OK053_313	Proteasome subunit alpha type-4	YGGWKATCIGNNSANAVSLLKQEYKEGETSLDEALSLAVKVLSKSLDLTKLTPDKVEMATLTRKDGKTVMTILPDNQVEAL
		OK053_314	S	FARGCTFSCEYQDNRCRGECHCPGKTSCYCTSGHHNKGCGCAC
		OK053_317	T	MLCLPVFIILLLLASPAAPKSLETRIQNDLIRAGLTDADLKTEKGFLSGLLNVAGSVCCKVDTSCCSNQ
		OK053_325	T	PVFVILLLLIASVPSVDAQLKTKDDMPLASSHAKVKRMLQILRNKRCCITMELCCEMETD
		OK053_328	T	MCCLPVFVILLLLIASAPSVDAQPKTKDDVPLAPLHDNAKSALQHLNQRCCQTFYWCCVQGK
		OK053_331	T	MLCLPVFVILLLLIASTPRVDARRKTKDNMPLAPFHENAKSTLQILLNKRQCCPTFSDCCEIEEEFGLK
		OK053_334	T	ILLLLIASIASDTVQLKTKHDMPLTSFHGNARQTLQMLLYKRHCCFIDTPCCEW
		OK053_336	T	MHCLPVVVILLLLTASGGPSVDAGLKTKDDVPLSSFRDNTKSILQRLWKRGNCCEFWEFCCD
		OK053_339	T	MRCLPVLIILLLLTASAPGVDVLPKTEDDMPLSSVYGNGKSILRGILRKGICCGVSFCYPC
		OK053_340	T	LPVVVILLLLTASGPSVDAGLKTKDDVPLASFLDNAKGTRQTSCCPDMPLCCVGIGK
		OK053_341	T	MRCLPVLIILLLLTASAPGVDVLPKTEDDMPLSSVYGNGKSILRGILRKDVCCGFRMCHPC
		OK053_342	T	PSVDAGLKTKDDVPLSSFRDNAKSIQQRQSTHYCCMYRLWCCR
		OK053_349	T	MRCLPVFVILLLLIASAPSVDARLKTKDDMPLASFHANVKRTLQILRDKRFCCRTQEVCCEVIKNG
		OK053_350	T	MRCLPVFVILLLLIASAPSVDARLKTKDDMPLPSSHANIKRTLQIHRNKRCCPGWELCCEWDEW
		OK053_351	T	MRCLPVLIILLLLTASAPSVDALLKTKGGVLRSSFRGNPERTRQKLSNNIRAWCHPCPFEYGQ
		OK053_352	T	MRCLPVFVILLLLIASAPSVDALLKTKGGVLRSSFRGNPERTRQKLSNNIRAWCHPCPFEYGQ
		OK053_354	T	MRCLPVFVILLLLIASAPSVDARLKTKDDMPLASFHANVKRTLQKLLNKRCCQIVPQCCEWN
		OK053_357	T	MCSLPVFIILLLLIPSAPSADVQPKTKDDVPLSSFRDNTKSTLQRLLKRVNCCPIDESCCS
		OK053_364	V	MAAPRMMSFILLLLLSLAIHCADGKAVQGDGDPSASLLTGDKNHDLPVKRDCTTCSGEECCGRCTCSWGNCNCISWGK
		OK053_365	V	MAAPRMMSFILLLLLSLAIHCADGKEVQGDGDPSASLLTGDQNHDLRVKRACITCNGEECCGKCTCLWGDTCSRSGWGK
		OK053_366	V	MAAPIMMSFILLLLLSLAIHCADGKAVQGDGDPSASLLTGDQNHDLRVKRACITCNGEECCGKCTCLWGDTCSRSGWGK
		OK053_367	Y	MQKAIVLILAILLLLPLSTAQDDEGSQENAAPRKRDTASQCGGTGTHCNEPEGQNCCTSLKCVNNCCWTTTEGCPS
		OK053_375	Conopressin / Conophysin	QACFIRNCPKGGKRDVDERQLVHACMFCSFGQCVGPHICCGDGGCQMGTPEANRCSQEDESPIPCQVIGNHCSLNNPGNIHGHCVAYGICCVDDTCTTHSGCL
		OK053_380	Ferritin	MSQVRQNFHEECEAAINRQINLQKYADYVYMSMSFYFDRDDVSLKGFHEFFKKKAHEECGYAEKLMEYQNMRGGRILLQTVKKPDRDDWGSGLEALQAALQLEKSINQSMMELHQCASCHNDPQMSDFVEDNFLKEQVETIKEISDYITNLKRVGTGLGEFIFDKETLQEKQE
		OK053_381	Ferritin	MALNVSQCRQNYHAESEAGVNRQINMELYACYCYQSMSFYFDRDDVALPGFAKYFKEMSDEEREHAEKLMKFQNKRGGRIVLQDIKKPDRDEWGTGLDAMQVALGLEKSVNQALLDLHEVATSHKDAQMTDFLEGEYLQEQVESIKKIGDHITNLKRVGSGLGEYMFDKNLS
		OK053_382	Ferritin	MALNVSQCRQNYHAESEAGVNRQINMELYACYCYQSMSFYFDRDDVALPGFAKYFKEMSDEEREHAEKLMKFQNKRGGRIVLQDIKKPDRDEWGTGLDAMQVALGLEKSVNQALLDLHEVATSHKDAQMTDFLEGEYLQEQVESIKKIGDHITNLKRVGTGLGEYMFDKNLS
		OK053_383	Ferritin	MAVSQCRQNYHAECEAGINRQINMELHASYCYQSMAFYFDRDDVALPGFAKFFRKSSEEEREHAEKLMTFQNQRGGRIVLQDIKKPDRDEWGSGLDAMQVALALEKSVNQSLLDLHEVATSHNDAQMTDFLEGNYLQEQVRSIKELGDYITNLKRVGPGLGEYMFDKETLQE
		OK053_384	Insulin	MTTSSYFLLVALGLLLYVCQSSFGGEHVCGSNQPNHPNGKCGSKMADYLEEQCEEEEAAQGGTNDARATTGRALSLSKRRGFLSMLKRRGKRNEASPLQRAGRGIVCECCKNHCTDEEFTEYCPHVTESG
		OK053_387	Lysozyme	MKWVGFLVWCGLLFCVRGSDVPCRQAGGTCQHNSIYCSGSYRRNMCAGSARRQCCIPASSGSDTPCINQGGTCQYDNRQCSGQYQSNLCSGAANRRCCIPSHSSSGSSHSSGGYNCYGNFMNLHPTGASAQTASQDGIDHGGVSASQRMVANDIHELNKRKHCYIQAGNNNCVHPAVIAGIASRESRGGAVINRTEGWGDNHNAYGIMQCDGGASGLGSRCTRYPWNSCEHINMMVEILLVPYIRTMQTKHRSWAPEQQLQGAVSAYNAGTGNVRTFHRMDEGTTGNDYSNDVMARAQHLVNRFGW
		OK053_395	PDI-A2	YPTIKFFHKEKPKSPTDYVGGRQAADIVNWLKKKTGPPAKELKEKDEVKAFVENNEVVVIGFFKDQESTGALAFKKAAAGIDDIPFAITSEDHVFKEYKMDKDGIVLLKKFDEGRNDFEGDLEEEAIVKHVRENQLPLVVEFTQESAQKIFGGEVKNHILLFLKKEGGEDTIEKFRGAAEDFKGKVLFIYLDTDNEENGRITEFFGLKDDEIPAVRLIQLAEDMSKYKPESSDLETATIKKFVQDFLDGKLKPHLMSEDVPGDWDAKPVKVLVGKNFKEVAMDKSKAVFVEFYAPWCGHCKQLAPIWDELGEKYKDSKDIVVAKMDATANEIEEVKVQSFPTLKYFPKDSEEAVDYNGERTLDAFVKFLESGGTEGAGVQEDEEEEEEDEEGDDEDLPR…
		OK053_396	PDI-A6	MKMTGTGLVLFSLAVAGVSALYSPSDDVVDLTPTNFHSKVINGDELWIVEFYAPWCGHCQSLAPEWKKAASALKGIVKVGAVNADDHNALGGQYGVRGFPTIKFFGLDKFKPQDYQGQRTAQGIVDFSINQAKSVASARLSGKKSGDSKSKSGGSGKAGDPADVVELTDSNFEKEVLEHDGLVMVEFYAPWCGHCKNLAPQWAKAASELKGKVKLCALDATVHTVMANRYGVRGYPTIKAFPAGKKDGEAEDYDGGRTASDIVQWAMEKAAANIPSPDVYEITSSEVLMDNCEGHQLCIISVLPQIYDCQSECRNNYISILKTLGEKFKKNQWGWLWAEAGAQPALEQSLEVGGFGYPALAAVNTRKMKFSLLRGQFSEKGINEFLRDLSYGKGSTSPL…
		OK053_397	PDI-A2	FVKKEGAKDTLDTFKAAAGEFKGKVLFIYLDTTKEENEHIMGFFGLKAADAPAMRLIQLGEGLAKYKPESDSLDKSTITKFVQDFLDGKLKPDLKSEEVPENWDAQPVKVLVSKNFKEVAMDKSKAVFVEFYAPWCGHCKELAPIWDQLGEKFKDSKDVIIAKMDATANELEDLQIKSFPTLQYFPKGSDEIIEYDGERTLKELIKFVESGGKQEPPKKEEEEKEEDDDKKKDEL
		OK053_404	PDI-A3	MRRAVILFSCIVLAVQASDVLEFTDSNFESKIKELDVALVEFYAPWCGHCKRLAPEYEKAATKLKKSDPPVPLVKVDCTAEPKTCSEYGVSGYPTLKIFKGGEFAKDYQGSRESDGIIKTMEREAGPASKELEDFKQYEDFIGRDTVCVVGFFADADSKMAKTFSKLADTHEGEIRFGHSTASAVMDKAKYKDEIVLFRPKVMQNKFEDSAVKFTGDATKKSAIEEFLTQEQFGMCGIRTMKNAGDFSKPTFVVFYDVDYVKNPKGSNYWRNRVMKVGKKLRDEGLKVFFGVSNKEEHSHELGECGLQDAEGDKPIVCAYDEKNRKFKMEEEFSVDSFEKFVRGVLNGEVEAYLKSEPVPENNDQPVKVVVAKNFDELVNDPEKDVLIEFYAPWCGHCK…
		OK053_431	Prohormone-4	GAALNPYSAMGYGAYPMWPAQFAHMWPLHPYYQTVMPAQEGMCSYDRPFKCWGSATCIAIEAICDKNFDCNNHADEDPRICVAGRRPSYDILVSYLMLPNQHWMLQKLFNNVDPYTAAHALKLATSLGDLRWSLALTDENINNTKTVLEAVENDNKGPLVSLGMQASAWESVKFLMKNLLSTDFFSD
		OK053_440	Transcription factor	MPRHLISDAHEWINEIPTVPIYYLAKPQPRERAWRNQRGKKTLLSLTLVRLCEET
		OK053_455	Conorfamide	MSGRGFLLLALLLLVTVEATTVEKNKPGVLDIPVKSNSDDDSIFR

## Sheet: 2-Shared_protein_families
Supplementary Material Table 2: List of the protein families found in the venom and the numer of proteins per family
Protein family	Predatory	Defensive	Transcriptome
A (conotoxin superfamily)	4	1	8
Aboa_01 (conotoxin superfamily)	1	1	2
Actin	1	0	0
Alkaline-Phosphatase-like	1	1	0
Angiotensin-converting enzyme-like	4	4	0
Arginine kinase	1	1	0
B1 (conotoxin superfamily)	0	0	3
B2 (conotoxin superfamily)	0	0	6
C (conotoxin superfamily)	0	0	1
Calreticulin-like	0	1	0
CAP-superfamily	1	1	2
Carbonic anhydrase2	1	1	0
Carboxypeptidase D-like	1	1	0
Carboxypeptidase E-1	2	1	0
Cerm_02 (conotoxin superfamily)	0	0	1
Cerm_03 (conotoxin superfamily)	0	0	6
Cerm_08 (conotoxin superfamily)	1	1	2
Cerm_10 (conotoxin superfamily)	0	0	1
Cerm_11 (conotoxin superfamily)	0	0	2
Choline transporter-like protein 2	1	1	0
Coagulation factor	1	0	0
Collagen alpha-4	3	3	0
Collagen-alpha-5	1	1	0
Con-ikot-ikot	0	0	2
Conkunitzin	0	0	1
Conodipine	0	1	1
Conoporin	1	1	0
Conopressin / Conophysin	1	1	2
Conorfamide	1	1	3
E (conotoxin superfamily)	1	0	2
EF-hand (Calcium binding)	1	1	0
Elongation factor	1	0	0
F (conotoxin superfamily)	1	1	4
Ferritin	0	0	4
FK506-binding protein 2-like	0	2	0
Galactose-binding-like	0	2	0
Gelsolin-like	1	1	0
GGNG-1 precursor	2	2	0
Glutamatinyl cyclase	1	1	0
H (conotoxin superfamily)	4	4	7
Hypotethical protein	1	1	0
I1 (conotoxin superfamily)	7	6	8
I2 (conotoxin superfamily)	0	2	8
I3 (conotoxin superfamily)	0	0	1
I4 (conotoxin superfamily)	1	0	2
Immunoglobulin-like domain	3	4	0
Insulin	1	0	2
J (conotoxin superfamily)	3	4	3
Lysozyme	0	0	1
M (conotoxin superfamily)	13	10	16
Metallopeptidase	2	2	0
N (conotoxin superfamily)	1	1	4
NA	26	23	0
Neuroendocrine convertase	1	1	0
Neuroendocrine convertase 1-like	1	0	0
Neuropeptide F	2	2	1
Nucleobinding-2-like	1	1	0
O1 (conotoxin superfamily)	14	14	35
O2 (conotoxin superfamily)	20	12	35
O3 (conotoxin superfamily)	0	0	2
P (conotoxin superfamily)	2	1	8
PDI-A2	3	5	7
PDI-A3	0	0	1
PDI-A6	0	0	1
PLAT/LH2 (membrane disrupting?)	0	1	0
Pmag_02 (conotoxin superfamily)	0	0	2
Prohormone-4	3	2	4
Pro-neuregulin	2	1	0
Proteasome subunit alpha type-4	0	0	1
protein DDB	1	1	0
R (conotoxin superfamily)	1	1	0
Rimp_01	0	0	1
Rmil_02	0	0	2
S (conotoxin superfamily)	2	2	2
Serine protease hepsin-like	1	1	0
Synaptic vesicle membrane	1	0	0
T (conotoxin superfamily)	10	7	24
Thioredoxin peroxidase 2	0	1	0
Thioredoxin-like	1	1	0
Thyrostimulin hormone alpha	1	1	1
Thyrostimulin hormone beta 5	1	1	1
Tpra_06 (conotoxin superfamily)	0	1	2
Transcription factor	0	0	1
Transmembrane protease serine 3-like	1	1	0
U (conotoxin superfamily)	0	2	2
V (conotoxin superfamily)	0	0	3
von Willebrand factor A-like (glycoprotein )	8	8	0
Y (conotoxin superfamily)	0	0	1

## Sheet: 3-Exclusive_protein_families
Supplementary Material Table 2: Protein families exclusive to the predatory (left) and defensive (right) venoms
Predatory	Number peptides	Found in transcriptome		Defensive	Number peptides	Found in transcriptome
Actin	1	No		Calreticulin-like	1	No
Coagulation factor	1	No		Conodipine	1	Yes
E	1	Yes		FK506-binding protein 2-like	2	No
Elongation factor	1	No		Galactose-binding-like	2	No
I4	1	Yes		I2	2	Yes
Insulin	1	Yes		PLAT/LH2	1	No
Synaptic vesicle membrane	1	No		Thioredoxin peroxidase 2	1	No
				Tpra_06	1	Yes
				U	2	Yes
