# Supplementary material for: A Combined Transcriptomics and Proteomics Approach Reveals the Differences in the Predatory and Defensive Venoms of the Molluscivorous Cone Snail Cylinder ammiralis (Caenogastropoda: Conidae)
Source: Toxins (Basel). 2021 Sep 10;13(9):642. doi: 10.3390/toxins13090642 (PMC8472973; doi:10.3390/toxins13090642)
Supplement: Supplementary file 1 [file toxins-13-00642-s001.zip › Sup. Mat. Table 3 - Summary significances among diets.xlsx]

## Sheet: Summary significances
Supplementary Material Table 3: Summary of the statistical analyses comparing the abundance of each superfamily per diet
		Pairwise significance			Differential diet	Average per diet			Standard error				Leyend significances
Superfamilies	Significance	Molluscivorous– Piscivorous	Molluscivorous – Vermivorous	Piscivorous – Vermivorous		Molluscivory	Vermivory	Piscivory	Molluscivory	Vermivory	Piscivory		No	P > 0,05
A	No				No	8.22381	2.74008	5.07569	3.41359	1.25201	0.929916		.	P ≤ 0,05
A2	No				No	0	0.419799	0.418709	0	0.221035	0.270542		*	P ≤ 0,01
Aant_01	.		*	.	Vermivorous	0	0.696296	0	0	0.311499	0		**	P ≤ 0,001
Aant_02	No				No	0	0.0778816	0	0	0.0778816	0		***	P ≤ 0,0001
Aant_03	*		*	*	Vermivorous	0	0.351245	0	0	0.117586	0
Aant_04	No				No	0	0.193618	0	0	0.126861	0
Aant_05	No				No	0	0.196085	0	0	0.127888	0
Aboa_01	No				No	0.136705	0.502678	0	0.136705	0.242975	0
Amai_01	No				No	0	0.0754148	0	0	0.0754148	0
B1	.	*	*		Molluscivorous	0.857143	6.16667	3.66667	0.404061	2.27181	0.494413
B2	No				No	0.855368	0.996192	2.03531	0.370414	0.246112	0.382396
C	.		*		Only extreme	0.0683527	0.656056	0.494318	0.0683527	0.149258	0.224558
Cerm_01	.	*			Only extreme	0	0.311821	1.10541	0	0.233333	0.312814
Cerm_02	No				No	0.0683527	0.153296	0.449065	0.0683527	0.096972	0.204731
Cerm_03	No				No	0.410116	2.48875	1.07146	0.410116	1.22481	0.688074
Cerm_04	No				No	0	0.30906	0.428359	0	0.230715	0.305855
Cerm_06	No				No	0	0	0.632695	0	0	0.415096
Cerm_07	No				No	0	0	0.30052	0	0	0.19017
Cerm_08	No				No	0.281006	0.382008	1.02362	0.181481	0.247694	0.420534
Cerm_10	No				No	0.0683527	0.655974	0.541258	0.0683527	0.329527	0.373864
Cerm_11	No				No	0.136705	0.464823	0.64428	0.136705	0.381548	0.211705
Cerm_13	No				No	0	0	0.438596	0	0	0.438596
Con-ikot-ikot	.		*		Only extreme	0.669792	2.22594	2.26898	0.281271	0.306699	0.943384
Conkunitzin	*	*	*		Molluscivorous	0.0683527	4.46961	7.08555	0.0683527	1.44561	1.27917
D	No				No	0	0.306593	0.759235	0	0.193944	0.437542
E	No				No	0.581957	1.08162	0.545618	0.168163	0.384035	0.258408
F	No				No	0.718662	0.975852	2.51048	0.25309	0.345917	1.57806
Ggeo_01	No				No	0.721501	0	0	0.721501	0	0
Ggeo03	No				No	0	0.387236	0.988637	0	0.253722	0.449115
H	No				No	2.04008	1.73105	2.07967	0.537132	0.644906	0.457671
I1	No				No	6.4924	1.31985	1.61131	3.13487	0.406596	0.262055
I2	.	*			Only extreme	7.5826	2.54138	1.69443	2.99203	1.05963	0.995893
I3	.		*		Only extreme	0.0683527	1.11482	0.72452	0.0683527	0.432653	0.339845
I4	No				No	0.840328	1.22026	1.03175	0.558072	0.454619	0.420046
I5	.	*		*	Piscivorous	0	0	0.494318	0	0	0.224558
J	No				No	1.9296	1.67784	1.04806	0.639688	0.507206	0.424644
K	No				No	0.0564653	0.228711	0.268748	0.0564653	0.155294	0.170955
L	.	.	*		Molluscivorous	0	0.68004	0.668167	0	0.303089	0.35656
M	No				No	10.9005	10.5765	14.4609	3.85132	1.53946	2.44234
M---L-LTVA	No				No	0	0.39075	0	0	0.256302	0
MKFPLLFISL	No				No	0	0.447427	0	0	0.447427	0
MKVAVVLLVS	No				No	0	0.23126	0	0	0.156471	0
MRFYIGLMAA	No				No	0	0.0797448	0	0	0.0797448	0
MSGLR	No				No	0	0.111857	0	0	0.111857	0
MSTLGMTLL	No				No	0	0.637959	0	0	0.637959	0
MWSGK	No				No	0	0.111857	0	0	0.111857	0
N	No				No	0.587107	0.946054	0	0.295861	0.445781	0
O1	No				No	20.0446	14.2759	13.1087	2.85359	1.76401	0.917417
O2	No				No	11.1371	8.62039	8.2135	3.29986	1.12928	1.38136
O3	.	*	.		Molluscivorous	0.525492	1.39797	2.63494	0.187032	0.342071	0.271045
P	No				No	1.71318	3.78816	0.944799	0.626497	1.61031	0.246357
Pmag_01	No				No	0	0.532427	0.154321	0	0.445552	0.154321
Pmag_02	No				No	0.281006	0.542999	1.14296	0.181481	0.253988	0.528019
Q	No				No	0	0.849592	0.500127	0	0.385176	0.350295
Rimp_01	No				No	0.0683527	0.502678	0.146199	0.0683527	0.242975	0.146199
Rimp_02	No				No	0	0.575626	0.152905	0	0.29801	0.152905
Rimp_03	No				No	0	0.422329	0.154321	0	0.223151	0.154321
Rimp_04	No				No	0	0.153296	0	0	0.096972	0
Rimp_05	No				No	0	0.349381	0.154321	0	0.168204	0.154321
Rmil_01	No				No	0	0.30906	0.152905	0	0.230715	0.152905
Rmil_02	No				No	0.136705	0.739084	0.30052	0.136705	0.366683	0.19017
S	*	*		**	Piscivorous	0.728269	0.456755	3.70087	0.130021	0.200167	0.254114
T	.	*			Only extreme	18.8977	11.322	11.0348	5.19562	1.97529	1.36403
Tand_01	No				No	0	0.424796	0.154321	0	0.192588	0.154321
Tpra_06	No				No	0.425306	0.349381	0.152905	0.298039	0.168204	0.152905
U	No				No	0.769978	0.653507	0	0.294821	0.325665	0
V	No				No	0.205058	0.571746	0.94044	0.205058	0.276708	0.336936
Y	No				No	0.0683527	0.458794	0	0.0683527	0.311784	0
Others/New	No				No	0.898473	3.89326	0	0.898473	2.06209	0
