# Supplementary material for: A Combined Transcriptomics and Proteomics Approach Reveals the Differences in the Predatory and Defensive Venoms of the Molluscivorous Cone Snail Cylinder ammiralis (Caenogastropoda: Conidae)
Source: Toxins (Basel). 2021 Sep 10;13(9):642. doi: 10.3390/toxins13090642 (PMC8472973; doi:10.3390/toxins13090642)
Supplement: Supplementary file 1 [file toxins-13-00642-s001.zip › Sup. Mat. Table 4 - mtDNA tree.xlsx]

## Sheet: Hoja1
Supp. Mat. Table 4: Mitochondrial genomes used in the phylogenetic analyses
Species	Diet	Reference	GenBank accesion
Conus marmoreus	Molluscivorous	Abalde et al. (2019)	--
Cylinder ammiralis	Molluscivorous	This study	--
Cylinder gloriamaris	Molluscivorous	Chen, Hsiao, Chen, Tseng, Wu, and Hwang (unpublished)	NC_030213
Cylinder textile	Molluscivorous	Bandyopadhyay et al. (2008)	NC_008797
Cylinder victoriae	Molluscivorous	Abalde et al. (2019)	--
Darioconus episcopatus	Molluscivorous	Abalde et al. (2019)	--
Eugeniconus nobilis	Molluscivorous	Abalde et al. (2019)	--
Dendroconus betulinus	Vermivorous	Abalde et al. (2019)	--
