# Supplementary material for: A Combined Transcriptomics and Proteomics Approach Reveals the Differences in the Predatory and Defensive Venoms of the Molluscivorous Cone Snail Cylinder ammiralis (Caenogastropoda: Conidae)
Source: Toxins (Basel). 2021 Sep 10;13(9):642. doi: 10.3390/toxins13090642 (PMC8472973; doi:10.3390/toxins13090642)
Supplement: Supplementary file 1 [file toxins-13-00642-s001.zip › Sup. Mat. Table 5 - Abundance superfamilies per diet.xlsx]

## Sheet: Superfamilies_abundance
Supplementary Material Table 5: Venom composition from all the specimens used in the comparative analysis
Source	This study	Robinson et al. (2017)	Robinson et al. (2014)	ConoServer	Lavergne et al. (2015)	Conoserver	Conoserver	Abalde et al. (2020)	Abalde et al. (2020)	Abalde et al. (2020)	Peng et al. (2016)	Li et al. (2017)	Gao et al. (2018)	Abalde et al. (2018)	Abalde et al. (2018)	Abalde et al. (2018)	Pardos-Blas et al. (2019)	Pardos-Blas et al. (2019)	Pardos-Blas et al. (2019)
Species	Cylinder ammiralis	Cylinder gloriamaris	Cylinder victoriae	Cylinder victoriae	Darioconus episcopatus	Darioconus episcopatus	Conus marmoreus	Africonus maioensis	Kalloconus trochulus	Varioconus mercator	Dendroconus betulinus	Turriconus praecellens	Calamiconus quercinus	Chelyconus ermineus	Chelyconus ermineus	Chelyconus ermineus	Pionoconus magus	Pionoconus magus	Pionoconus magus
Diet	Molluscivory	Molluscivory	Molluscivory	Molluscivory	Molluscivory	Molluscivory	Molluscivory	Vermivory	Vermivory	Vermivory	Vermivory	Vermivory	Vermivory	Piscivory	Piscivory	Piscivory	Piscivory	Piscivory	Piscivory
Comments					Based on Supp. Dataset_S01			A_0055	K_0010	V_1302				Cerm_1	Cerm_2	Cerm_3	Pmag_1	Pmag_2	Pmag_3
A	8	3	3	4	27	1	7	1	3	3	9	0	9	3	3	5	7	9	5
A2	0	0	0	0	0	0	0	1	1	0	0	2	0	0	2	1	0	0	0
Aant_01	0	0	0	0	0	0	0	3	2	3	0	0	0	0	0	0	0	0	0
Aant_02	0	0	0	0	0	0	0	1	0	0	0	0	0	0	0	0	0	0	0
Aant_03	0	0	0	0	0	0	0	1	1	1	1	0	0	0	0	0	0	0	0
Aant_04	0	0	0	0	0	0	0	0	1	1	0	0	0	0	0	0	0	0	0
Aant_05	0	0	0	0	0	0	0	1	1	0	0	0	0	0	0	0	0	0	0
Aboa_01	2	0	0	0	0	0	0	3	1	2	0	0	0	0	0	0	0	0	0
Amai_06	0	0	0	0	0	0	0	0	0	1	0	0	0	0	0	0	0	0	0
B1	3	1	1	1	0	0	0	8	2	3	15	0	9	3	5	2	4	5	3
B2	6	1	1	1	0	0	1	1	2	1	1	2	2	3	3	3	1	1	2
C	1	0	0	0	0	0	0	2	1	2	1	0	1	0	0	0	1	1	1
Cerm_01	0	0	0	0	0	0	0	0	2	1	0	0	0	1	2	1	1	0	2
Cerm_02	1	0	0	0	0	0	0	1	0	1	0	0	0	1	1	1	0	0	0
Cerm_03	6	0	0	0	0	0	0	10	10	7	0	0	0	3	5	0	0	0	0
Cerm_04	0	0	0	0	0	0	0	3	0	1	0	0	0	2	1	0	0	0	0
Cerm_06	0	0	0	0	0	0	0	0	0	0	0	0	0	0	2	0	0	0	2
Cerm_07	0	0	0	0	0	0	0	0	0	0	0	0	0	0	0	0	1	1	0
Cerm_08	2	1	0	0	0	0	0	2	0	3	0	0	0	3	2	1	1	0	0
Cerm_10	1	0	0	0	0	0	0	4	1	3	0	0	0	0	3	1	0	0	0
Cerm_11	2	0	0	0	0	0	0	5	0	1	0	0	0	0	1	1	0	1	1
Cerm_13	0	0	0	0	0	0	0	0	0	0	0	0	0	0	0	0	3	0	0
Con-ikot-ikot	2	2	1	1	0	0	0	3	3	5	4	3	4	5	4	5	1	0	0
Conkunitzin	1	0	0	0	0	0	0	9	6	8	8	0	12	5	6	6	7	9	11
D	0	0	0	0	0	0	0	2	0	2	0	0	0	3	0	0	1	1	0
E	2	1	1	1	0	0	1	2	2	1	2	0	3	0	2	0	1	1	0
F	4	1	1	1	0	0	1	2	3	3	3	0	0	1	3	0	2	11	0
Ggeo_01	0	5	0	0	0	0	0	0	0	0	0	0	0	0	0	0	0	0	0
Ggeo03	0	0	0	0	0	0	0	0	2	2	0	0	0	0	0	0	2	2	2
H	7	3	3	3	0	0	7	5	2	10	3	1	0	2	2	4	2	1	2
I1	8	2	6	6	5	1	3	5	1	4	5	1	0	1	1	2	2	2	2
I2	8	3	4	5	14	1	12	2	2	1	8	2	8	7	1	2	0	1	0
I3	1	0	0	0	0	0	0	1	3	1	2	4	0	2	2	1	0	0	0
I4	2	4	1	0	0	0	0	5	1	5	0	3	0	3	2	1	0	1	0
I5	0	0	0	0	0	0	0	0	0	0	0	0	0	0	0	0	1	1	1
J	3	4	4	4	0	0	3	1	2	4	3	6	1	0	2	0	1	3	1
K	0	0	0	0	0	0	1	1	0	2	0	0	0	0	1	0	1	0	0
L	0	0	0	0	0	0	0	1	0	1	0	2	2	0	3	0	1	1	0
M	16	7	13	13	11	0	82	14	13	18	30	24	10	14	12	13	18	11	22
M---L-LTVA	0	0	0	0	0	0	0	0	0	0	3	0	1	0	0	0	0	0	0
MKFPLLFISL	0	0	0	0	0	0	0	0	0	0	0	4	0	0	0	0	0	0	0
MKVAVVLLVS	0	0	0	0	0	0	0	0	0	0	1	0	1	0	0	0	0	0	0
MRFYIGLMAA	0	0	0	0	0	0	0	0	0	0	1	0	0	0	0	0	0	0	0
MSGLR	0	0	0	0	0	0	0	0	0	0	0	1	0	0	0	0	0	0	0
MSTLGMTLL	0	0	0	0	0	0	0	0	0	0	8	0	0	0	0	0	0	0	0
MWSGK	0	0	0	0	0	0	0	0	0	0	0	1	0	0	0	0	0	0	0
N	4	1	0	0	0	0	3	2	2	1	6	0	0	0	0	0	0	0	0
O1	35	12	21	25	21	1	86	29	13	36	33	31	11	13	17	14	19	11	11
O2	35	18	20	23	0	0	16	22	18	20	16	7	8	8	18	10	10	4	5
O3	2	1	1	1	0	0	0	5	2	4	4	0	1	4	3	3	3	2	2
P	8	3	3	3	0	0	0	1	3	3	13	16	2	0	1	1	1	2	1
Pmag_01	0	0	0	0	0	0	0	1	0	0	0	0	3	0	0	0	0	1	0
Pmag_02	2	1	0	0	0	0	0	2	2	2	0	0	0	0	0	0	2	3	2
Q	0	0	0	0	0	0	0	4	2	4	0	0	0	1	0	2	0	0	0
Rimp_01	1	0	0	0	0	0	0	3	1	2	0	0	0	0	0	0	1	0	0
Rimp_02	0	0	0	0	0	0	0	2	1	4	0	0	0	1	0	0	0	0	0
Rimp_03	0	0	0	0	0	0	0	1	1	3	0	0	0	0	0	0	0	1	0
Rimp_04	0	0	0	0	0	0	0	1	0	1	0	0	0	0	0	0	0	0	0
Rimp_05	0	0	0	0	0	0	0	2	1	1	0	0	0	0	0	0	0	1	0
Rmil_01	0	0	0	0	0	0	0	3	0	1	0	0	0	1	0	0	0	0	0
Rmil_02	2	0	0	0	0	0	0	3	3	2	0	0	0	0	0	0	1	1	0
S	2	1	1	1	1	0	2	1	0	1	1	2	0	5	5	4	4	3	3
T	24	21	26	26	70	0	28	20	21	25	17	28	6	13	19	10	14	14	4
Tand_01	0	0	0	0	0	0	0	2	1	2	0	0	0	0	0	0	0	1	0
Tpra_06	2	2	0	0	0	0	0	2	1	1	0	0	0	1	0	0	0	0	0
U	2	1	2	2	0	0	0	3	1	4	0	0	0	0	0	0	0	0	0
V	3	0	0	0	0	0	0	3	0	3	0	1	0	0	2	2	0	1	1
Y	1	0	0	0	0	0	0	2	0	0	0	0	2	0	0	0	0	0	0
Others/New	0	0	0	0	10	0	0	0	0	0	11	8	14	0	0	0	0	0	0
Total	209	99	113	121	159	4	253	214	141	221	209	149	110	109	136	96	114	108	86
